# Supplementary material for: Epigenome-wide association study of left-handedness for different tissues and ages
Source: Research Square preprint supplement (doi:10.21203/rs.3.rs-375556/v1), 2021-04-12
Supplement: Supplementary file 1 [file 2900ae52650a5ad32e398389.xlsx]

## Sheet: content
sheet	Title
S5	Inflation estimates and alpha Bonferroni in the models
S6	Meta-analysis (NTR and ALSPAC adults), basic model
S8	Handedness, EWAS, NTR adults, basic model
S9	Handedness, EWAS, NTR adults, adjusted model
S10	Handedness, EWAS, ALSPAC adults, basic model
S11	Handedness, EWAS, ALSPAC adults, adjusted model
S12	EWAS follow-up of CpGs from significant DMRs
		change direction of effect

## Sheet: S5
Table S5. Inflation estimates and alpha Bonferroni in the models
model	N sample	N probes	bias (bc)	Bayesian estimate of inflation	Median-based lambda	alpha Bonferroni
Metaanalysis (NTR adults + ALSPAC adults) (basic)	3941*	409563	0.171	1.039	1.18	1.22e-07
Metaanalysis (NTR adults + ALSPAC adults) (adjusted)	3721*	409562	0.166	1.049	1.19	1.22e-07
EWAS of handedness in NTR adults (basic)	2710*	411169	0.002	1.009	1.07	1.22e-07
EWAS of handedness in NTR adults (adjusted)	2663*	411169	-0.012	1.009	1.07	1.22e-07
EWAS of handedness in ALSPAC adults (basic)	1232	471465	0.074	0.994	1.15	1.06e-07
EWAS of handedness in ALSPAC adults (adjusted)	1058	471465	0.095	1.013	1.21	1.06e-07
EWAS of handedness in ALSPAC at birth (basic)	703	471465	-0.026	0.962	0.949	1.06e-07
EWAS of handedness in ALSPAC at birth (adjusted)	688	471465	0.007	0.963	0.956	1.06e-07
EWAS of handedness in ALSPAC at 7 years (basic)	757	471465	0.063	1.037	1.01	1.06e-07
EWAS of handedness in ALSPAC at 7 years (adjusted)	742	471465	0.053	1.029	1.04	1.06e-07
EWAS of handedness in ALSPAC at 17 years (basic)	759	471465	0.093	1.035	1.02	1.06e-07
EWAS of handedness in ALSPAC at 17 years (adjusted)	641	471465	0.012	1.004	0.996	1.06e-07
EWAS of handedness in ALSPAC at 24 years (basic)	442	838019	-0.044	0.984	0.977	5.97e-08
EWAS of handedness in ALSPAC at 24 years (adjusted)	431	838019	-0.058	0.986	0.992	5.97e-08
EWAS of handedness in NTR children (basic)	946	787711	0.393	1.043	1.37	6.35e-08
EWAS of handedness in NTR children (adjusted)	866	787711	0.359	1.016	1.26	6.35e-08
MZ discordant within-pair EWAS in adults (basic)	266	411169	0.112	0.969	0.954	1.22e-07
MZ discordant within-pair EWAS in adults (adjusted)	264	411169	0.121	0.967	0.953	1.22e-07
MZ discordant within-pair EWAS in children (basic)	172	787711	-0.247	0.933	0.932	6.35e-08
MZ discordant within-pair EWAS in children (adjusted)	168	787711	-0.267	0.932	0.945	6.35e-08
The number includes duplicates (see Methods and Subjects)

## Sheet: S6
Table S6. Meta-analysis (NTR adults and ALSPAC adults), RH vs LH (basic model)
cgid	CHR	Position	Gene	Gene.region	N NTR	N ALSPAC	Weight	Estimate	SE	p-value	q-value	Direction
cg22804475	8	20054597	ATP6V1B2	TSS200	2695	1196	3891	-0.0007	0.0001	3.296e-06	0.402528	--
cg13719901	3	46608139	LRRC2;LRRC2	5'UTR;TSS200	2710	1226	3936	0.0077	0.0017	4.985e-06	0.402528	++
cg09239756	12	106642360	CKAP4	TSS1500	2707	1225	3932	-0.0029	0.0006	5.421e-06	0.402528	--
cg02850812	13	46961666	C13orf18	TSS200	2710	1216	3926	-0.0013	0.0003	6.585e-06	0.402528	--
cg01878788	6	33176342	RING1;RING1	1stExon;5'UTR	2700	1204	3904	-0.0008	0.0002	9.04e-06	0.402528	--
cg07506334	16	3073707	HCFC1R1;HCFC1R1;HCFC1R1;THOC6;THOC6	Body;Body;Body;TSS1500;TSS1500	2707	1222	3929	-0.002	0.0005	1.333e-05	0.402528	--
cg12802822	11	58910102	FAM111A;FAM111A;FAM111A	TSS1500;TSS1500;TSS1500	2705	1217	3922	-0.0006	0.0001	1.502e-05	0.402528	--
cg02060794	3	52273307	TWF2	TSS200	2710	1223	3933	-0.0006	0.0001	1.57e-05	0.402528	--
cg25625872	20	62258572	GMEB2	TSS200	2707	1223	3930	-0.0004	0.0001	1.716e-05	0.402528	--
cg23782833	7	218121	FAM20C	Body	2705	1229	3934	-0.0048	0.0011	1.76e-05	0.402528	--
cg07556148	3	49577474			2703	1222	3925	-0.001	0.0002	2.174e-05	0.402528	--
cg20832722	2	198523055	RFTN2	Body	2706	1223	3929	-0.007	0.0016	2.213e-05	0.402528	--
cg17162132	11	62439285	C11orf83;C11orf48	1stExon;TSS200	2671	1193	3864	-0.0005	0.0001	2.222e-05	0.402528	--
cg15260437	17	79430805	BAHCC1	Body	2709	1231	3940	-0.0063	0.0015	2.396e-05	0.402528	--
cg14235273	17	47295142	ABI3;ABI3	Body;Body	2710	1231	3941	-0.0057	0.0013	2.524e-05	0.402528	--
cg13239297	3	50192725	SEMA3F	TSS200	2709	1227	3936	-0.0015	0.0004	2.568e-05	0.402528	--
cg09893588	20	61340109	NTSR1	TSS200	2703	1184	3887	-0.001	0.0002	2.592e-05	0.402528	--
cg01513909	11	64889881	FAU;MRPL49	TSS1500;1stExon	2706	1227	3933	-0.0007	0.0002	2.704e-05	0.402528	--
cg03333377	11	93277841	C11orf75	TSS1500	2707	1227	3934	0.0061	0.0015	2.737e-05	0.402528	++
cg14039020	8	99989605			2708	1232	3940	-0.0092	0.0022	2.884e-05	0.402528	--
cg14438323	17	58156134	HEATR6	1stExon	2705	1227	3932	-0.0009	0.0002	2.955e-05	0.402528	--
cg06954540	11	65686660	C11orf68;C11orf68;DRAP1	TSS200;TSS200;TSS200	2710	1226	3936	-0.0005	0.0001	3.029e-05	0.402528	--
cg01741924	16	31453406	ZNF843	5'UTR	2710	1225	3935	0.0071	0.0017	3.286e-05	0.402528	++
cg19613592	15	59639303	MYO1E	Body	2708	1228	3936	-0.0048	0.0011	3.306e-05	0.402528	--
cg16852837	18	51750955	MBD2;MBD2;MBD2;MBD2	1stExon;1stExon;5'UTR;5'UTR	2707	1224	3931	-0.0005	0.0001	3.395e-05	0.402528	--
cg18173908	7	129710284	KLHDC10	TSS200	2706	1222	3928	-0.0013	0.0003	3.436e-05	0.402528	--
cg03074872	20	45035404	ELMO2;ELMO2	TSS200;TSS200	2706	1217	3923	-0.0021	0.0005	3.459e-05	0.402528	--
cg24630209	17	60744606	MRC2	Body	2710	1231	3941	-0.0038	0.0009	3.624e-05	0.402528	-+
cg24881202	1	11724943	FBXO6	5'UTR	2708	1230	3938	-0.005	0.0012	3.647e-05	0.402528	--
cg12402132	12	121148554	UNC119B	Body	2707	1227	3934	-0.0007	0.0002	3.782e-05	0.402528	--
cg03960589	17	40840485	CNTNAP1	Body	2710	1225	3935	-0.0031	0.0008	3.803e-05	0.402528	--
cg04021745	1	236445389	ERO1LB	TSS200	2707	1214	3921	-0.0004	0.0001	3.815e-05	0.402528	--
cg13959088	3	13035351	IQSEC1	Body	2704	1227	3931	-0.0005	0.0001	3.979e-05	0.402528	--
cg07106761	12	112205145	ALDH2	Body	2704	1221	3925	0.0043	0.0011	4.01e-05	0.402528	++
cg12500891	11	57225987			2708	1210	3918	0.0017	0.0004	4.049e-05	0.402528	++
cg25626012	10	95721252	PIPSL	Body	2709	1225	3934	-0.0045	0.0011	4.237e-05	0.402528	--
cg06550462	18	5544208	EPB41L3	TSS1500	2710	1228	3938	0.004	0.001	4.334e-05	0.402528	++
cg23089549	11	44331905	ALX4	TSS200	2707	1230	3937	0.0052	0.0013	4.398e-05	0.402528	++
cg22541911	12	51785465	GALNT6	TSS1500	2699	1214	3913	-0.0008	0.0002	4.501e-05	0.402528	--
cg17278249	12	76478805	NAP1L1;NAP1L1	TSS200;TSS200	2707	1228	3935	-0.0008	0.0002	4.565e-05	0.402528	--
cg11985287	19	2556805	GNG7	5'UTR	2710	1222	3932	-0.0044	0.0011	4.591e-05	0.402528	--
cg01822537	2	9695953	ADAM17	TSS200	2710	1225	3935	-0.0007	0.0002	4.745e-05	0.402528	--
cg24800655	12	133065941	FBRSL1	TSS1500	2710	1225	3935	-0.0004	0.0001	4.767e-05	0.402528	--
cg12338697	4	166034274	TMEM192	TSS1500	2708	1204	3912	-0.0012	0.0003	4.79e-05	0.402528	--
cg23986470	19	57831678	ZNF543	TSS200	2703	1207	3910	-0.0008	0.0002	4.915e-05	0.402528	--
cg06812522	12	569221	B4GALNT3	TSS1500	2710	1219	3929	-0.0011	0.0003	5.101e-05	0.402528	--
cg26528128	19	1095391	POLR2E	TSS200	2697	1227	3924	-0.0006	0.0001	5.49e-05	0.402528	--
cg04217419	2	129075484	HS6ST1	Body	2707	1220	3927	-0.0007	0.0002	5.497e-05	0.402528	--
cg00987513	1	145413337	HFE2;HFE2;HFE2;HFE2;HFE2;HFE2;HFE2;HFE2	1stExon;5'UTR;5'UTR;1stExon;1stExon;5'UTR;5'UTR;1stExon	2710	1229	3939	-0.0039	0.001	5.709e-05	0.402528	--
cg20347626	2	25896320	DTNB;DTNB;DTNB;DTNB;DTNB;DTNB;DTNB;DTNB;DTNB;DTNB	1stExon;1stExon;1stExon;5'UTR;5'UTR;5'UTR;1stExon;5'UTR;1stExon;5'UTR	2696	1225	3921	-0.0006	0.0002	5.741e-05	0.402528	--
cg09111071	4	38665154	FLJ13197;KLF3	Body;TSS1500	2710	1223	3933	-0.0011	0.0003	5.781e-05	0.402528	--
cg02425732	20	17662212	RRBP1;RRBP1	5'UTR;5'UTR	2699	1221	3920	-0.0022	0.0006	5.811e-05	0.402528	--
cg07441654	11	1330807	TOLLIP;LOC255512;TOLLIP	1stExon;TSS200;5'UTR	2709	1225	3934	-0.0003	0.0001	5.959e-05	0.402528	--
cg22860233	1	235324437	RBM34;RBM34;RBM34	Body;Body;Body	2696	1214	3910	-0.0008	0.0002	6.225e-05	0.402528	--
cg23977631	2	100938799	LONRF2;LONRF2	5'UTR;1stExon	2708	1216	3924	-0.0006	0.0002	6.343e-05	0.402528	--
cg16619935	16	2037439	GFER	3'UTR	2708	1228	3936	-0.0031	0.0008	6.438e-05	0.402528	--
cg25956012	20	35086635	DLGAP4	Body	2705	1219	3924	0.0035	0.0009	6.573e-05	0.402528	++
cg24113439	19	11216129	LDLR	Body	2709	1223	3932	-0.0025	0.0006	6.596e-05	0.402528	--
cg15739997	20	48729771	UBE2V1;UBE2V1;UBE2V1;TMEM189-UBE2V1;UBE2V1	TSS200;Body;Body;Body;Body	2701	1227	3928	-0.0006	0.0001	6.803e-05	0.402528	--
cg02473680	21	43639067	ABCG1;ABCG1;ABCG1;ABCG1;ABCG1;ABCG1	TSS1500;TSS200;5'UTR;Body;Body;TSS200	2703	1228	3931	-0.0007	0.0002	6.858e-05	0.402528	--
cg13997759	19	39230902	CAPN12	Body	2706	1232	3938	-0.0064	0.0016	6.867e-05	0.402528	--
cg02822963	3	149470953	COMMD2	TSS1500	2709	1210	3919	0.003	0.0008	6.921e-05	0.402528	++
cg02976929	1	234656318			2702	1226	3928	-0.0023	0.0006	7.084e-05	0.402528	--
cg13241807	11	33757992	CD59;CD59;CD59;CD59;CD59;CD59;CD59;CD59	1stExon;5'UTR;1stExon;5'UTR;5'UTR;1stExon;5'UTR;1stExon	2708	1223	3931	-0.001	0.0003	7.192e-05	0.402528	--
cg01777187	21	40721343	HMGN1	TSS1500	2702	1225	3927	-0.0007	0.0002	7.23e-05	0.402528	--
cg06839611	1	19812479	CAPZB	TSS1500	2710	1216	3926	-0.0006	0.0001	7.264e-05	0.402528	--
cg10899904	8	74005557	C8orf84	TSS200	2706	1198	3904	-0.0011	0.0003	7.391e-05	0.402528	--
cg12365107	3	52720035	GNL3;GNL3;GNL3;PBRM1;GNL3;GNL3;GNL3	1stExon;5'UTR;5'UTR;TSS200;1stExon;5'UTR;1stExon	2695	1191	3886	-0.0004	0.0001	7.459e-05	0.402528	+-
cg20680872	18	2655890	SMCHD1;SMCHD1	5'UTR;1stExon	2709	1219	3928	-0.0007	0.0002	7.484e-05	0.402528	--
cg27530239	17	46909074	CALCOCO2	5'UTR	2710	1211	3921	0.0049	0.0012	7.494e-05	0.402528	+-
cg06606198	12	124086727	DDX55	1stExon	2699	1212	3911	-0.0006	0.0002	7.803e-05	0.411969	--
cg15492422	19	2328553	SPPL2B;LSM7;SPPL2B	TSS200;Body;TSS200	2710	1225	3935	-0.0005	0.0001	7.952e-05	0.411969	--
cg04873147	13	73634369	KLF5	Body	2707	1201	3908	0.0017	0.0004	7.999e-05	0.411969	++
cg14719188	2	20851049	HS1BP3	TSS200	2705	1203	3908	-0.0005	0.0001	8.114e-05	0.411969	--
cg06343669	12	132690782	GALNT9;GALNT9	Body;TSS1500	2710	1230	3940	-0.0103	0.0026	8.269e-05	0.411969	--
cg23621158	4	83206416			2706	1221	3927	-0.0007	0.0002	8.569e-05	0.411969	--
cg15809694	7	150675516	KCNH2;KCNH2	TSS1500;TSS1500	2710	1225	3935	-0.0005	0.0001	8.604e-05	0.411969	--
cg24098326	10	123923050	TACC2;TACC2;TACC2;TACC2	Body;TSS200;TSS200;Body	2701	1222	3923	-0.0008	0.0002	8.669e-05	0.411969	+-
cg10267855	11	67121112	POLD4;LOC100130987	TSS200;Body	2690	1228	3918	-0.0007	0.0002	8.783e-05	0.411969	--
cg03611732	10	21785697	C10orf114;MIR1915	1stExon;TSS200	2706	1227	3933	-0.0005	0.0001	8.81e-05	0.411969	--
cg13946860	20	35807510	RPN2;RPN2;C20orf132;RPN2;C20orf132;RPN2;C20orf132	1stExon;5'UTR;Body;5'UTR;Body;1stExon;Body	2690	1212	3902	-0.0004	0.0001	9.079e-05	0.411969	--
cg12748915	4	95373019	PDLIM5;PDLIM5;PDLIM5;PDLIM5;PDLIM5	TSS200;TSS200;TSS200;TSS200;TSS200	2709	1226	3935	-0.0007	0.0002	9.298e-05	0.411969	--
cg07472199	16	31453477	ZNF843	5'UTR	2710	1212	3922	0.0086	0.0022	9.5e-05	0.411969	++
cg07474126	12	121975243	KDM2B;KDM2B	Body;Body	2710	1226	3936	-0.0006	0.0001	9.586e-05	0.411969	--
cg26240185	11	13690157	FAR1	TSS200	2699	1220	3919	-0.0005	0.0001	9.59e-05	0.411969	--
cg21665557	2	220427342	OBSL1	Body	2706	1167	3873	0.0026	0.0007	9.613e-05	0.411969	++
cg01561160	8	98637229			2692	1206	3898	0.0021	0.0005	9.634e-05	0.411969	++
cg03546163	6	35654363	FKBP5;FKBP5;FKBP5;FKBP5	5'UTR;5'UTR;5'UTR;5'UTR	2705	1232	3937	0.0103	0.0026	9.642e-05	0.411969	++
cg13984393	1	52831958	CC2D1B	TSS200	2710	1222	3932	-0.0004	0.0001	9.788e-05	0.412393	--
cg24375895	1	247374146			2710	1216	3926	-0.001	0.0003	9.88e-05	0.412393	+-
cg22987116	6	37461296	C6orf129	Body	2705	1229	3934	-0.003	0.0008	0.0001009	0.412393	--
cg09490756	16	86665961			2704	1214	3918	-0.0022	0.0006	0.0001018	0.412393	--
cg01934142	4	39368026	RFC1	TSS200	2707	1219	3926	-0.0007	0.0002	0.0001029	0.412393	--
cg02973320	1	162467753	UHMK1;UHMK1	1stExon;5'UTR	2701	1224	3925	-0.0008	0.0002	0.0001031	0.412393	--
cg11887124	14	101341331	MIR665	TSS200	2704	1230	3934	-0.0039	0.001	0.0001051	0.415967	--
cg01850135	16	4516078	NMRAL1	Body	2703	1232	3935	-0.0075	0.0019	0.000107	0.417081	--
cg12555306	19	58459142	ZNF256	TSS200	2709	1215	3924	-0.0004	0.0001	0.0001076	0.417081	--
cg18679324	5	85916067	COX7C	3'UTR	2698	1222	3920	0.0038	0.001	0.0001106	0.424296	++
cg12527384	11	123525060	SCN3B;SCN3B;SCN3B;SCN3B	1stExon;5'UTR;1stExon;5'UTR	2706	1222	3928	-0.0008	0.0002	0.0001149	0.424296	--
cg17498424	22	42528123	CYP2D6;CYP2D6	TSS1500;TSS1500	2691	1213	3904	-0.0059	0.0015	0.0001153	0.424296	--

## Sheet: S7
Table S7. Meta-analysis (NTR adults and ALSPAC adults), RH vs LH (adjusted model)
cgid	CHR	Position	Gene	Gene.region	N NTR	N ALSPAC	Weight	Estimate	SE	p-value	q-value	Direction
cg22804475	8	20054597	ATP6V1B2	TSS200	2648	1030	3678	-0.0007	0.0002	1.283e-06	0.197397	--
cg09239756	12	106642360	CKAP4	TSS1500	2660	1052	3712	-0.0032	0.0007	1.816e-06	0.197397	--
cg22541911	12	51785465	GALNT6	TSS1500	2653	1043	3696	-0.001	0.0002	1.897e-06	0.197397	--
cg13719901	3	46608139	LRRC2;LRRC2	5'UTR;TSS200	2663	1052	3715	0.0081	0.0017	2.604e-06	0.197397	++
cg02850812	13	46961666	C13orf18	TSS200	2663	1047	3710	-0.0014	0.0003	2.623e-06	0.197397	--
cg16852837	18	51750955	MBD2;MBD2;MBD2;MBD2	1stExon;1stExon;5'UTR;5'UTR	2660	1051	3711	-0.0006	0.0001	3.277e-06	0.205512	--
cg09893588	20	61340109	NTSR1	TSS200	2657	1019	3676	-0.0011	0.0003	9.117e-06	0.256332	--
cg12402132	12	121148554	UNC119B	Body	2660	1054	3714	-0.0009	0.0002	9.542e-06	0.256332	--
cg05922972	15	77362853	TSPAN3;TSPAN3;TSPAN3	Body;Body;Body	2651	1046	3697	-0.0005	0.0001	1.089e-05	0.256332	--
cg25956012	20	35086635	DLGAP4	Body	2658	1048	3706	0.0031	0.0007	1.108e-05	0.256332	++
cg01777187	21	40721343	HMGN1	TSS1500	2655	1051	3706	-0.0009	0.0002	1.114e-05	0.256332	--
cg03333377	11	93277841	C11orf75	TSS1500	2661	1056	3717	0.0065	0.0015	1.124e-05	0.256332	++
cg19613592	15	59639303	MYO1E	Body	2661	1055	3716	-0.0051	0.0012	1.144e-05	0.256332	--
cg01513909	11	64889881	FAU;MRPL49	TSS1500;1stExon	2660	1055	3715	-0.0008	0.0002	1.176e-05	0.256332	--
cg17162132	11	62439285	C11orf83;C11orf48	1stExon;TSS200	2625	1023	3648	-0.0005	0.0001	1.39e-05	0.256332	--
cg24800655	12	133065941	FBRSL1	TSS1500	2663	1052	3715	-0.0005	0.0001	1.399e-05	0.256332	--
cg01878788	6	33176342	RING1;RING1	1stExon;5'UTR	2653	1033	3686	-0.0009	0.0002	1.521e-05	0.256332	--
cg00746864	17	65373877	PITPNC1;PITPNC1	TSS200;TSS200	2657	1051	3708	-0.001	0.0002	1.606e-05	0.256332	--
cg01822537	2	9695953	ADAM17	TSS200	2663	1051	3714	-0.0008	0.0002	1.699e-05	0.256332	--
cg07506334	16	3073707	HCFC1R1;HCFC1R1;HCFC1R1;THOC6;THOC6	Body;Body;Body;TSS1500;TSS1500	2660	1048	3708	-0.0021	0.0005	1.727e-05	0.256332	--
cg25999486	13	76056030	TBC1D4;TBC1D4	1stExon;5'UTR	2661	1041	3702	-0.0009	0.0002	1.771e-05	0.256332	--
cg14438323	17	58156134	HEATR6	1stExon	2658	1053	3711	-0.001	0.0002	1.774e-05	0.256332	--
cg24630209	17	60744606	MRC2	Body	2663	1057	3720	-0.0039	0.0009	1.83e-05	0.256332	--
cg14039020	8	99989605			2661	1058	3719	-0.0096	0.0022	1.857e-05	0.256332	--
cg06875060	7	128096171	C7orf68;C7orf68	5'UTR;5'UTR	2661	1055	3716	-0.0017	0.0004	1.957e-05	0.256332	--
cg23782833	7	218121	FAM20C	Body	2658	1055	3713	-0.0048	0.0011	2.012e-05	0.256332	--
cg13959088	3	13035351	IQSEC1	Body	2657	1054	3711	-0.0006	0.0001	2.112e-05	0.256332	--
cg13997759	19	39230902	CAPN12	Body	2659	1058	3717	-0.007	0.0016	2.16e-05	0.256332	--
cg14235273	17	47295142	ABI3;ABI3	Body;Body	2663	1057	3720	-0.0058	0.0014	2.279e-05	0.256332	-+
cg01850135	16	4516078	NMRAL1	Body	2656	1058	3714	-0.0082	0.0019	2.347e-05	0.256332	--
cg15739997	20	48729771	UBE2V1;UBE2V1;UBE2V1;TMEM189-UBE2V1;UBE2V1	TSS200;Body;Body;Body;Body	2654	1055	3709	-0.0007	0.0002	2.427e-05	0.256332	--
cg27256934	11	61197489	CPSF7;CPSF7;CPSF7;SDHAF2	TSS200;TSS200;TSS200;TSS200	2660	1054	3714	-0.0008	0.0002	2.442e-05	0.256332	--
cg26528128	19	1095391	POLR2E	TSS200	2650	1054	3704	-0.0007	0.0002	2.518e-05	0.256332	--
cg03232960	7	2595437	C7orf27	TSS1500	2662	1053	3715	-0.0009	0.0002	2.578e-05	0.256332	--
cg11145633	14	91976900	SMEK1	TSS1500	2662	1053	3715	-0.0008	0.0002	2.603e-05	0.256332	--
cg22223602	11	119077220	CBL	1stExon	2654	1048	3702	-0.0006	0.0001	2.667e-05	0.256332	--
cg16532176	3	156393537	TIPARP;LOC100287227	5'UTR;TSS200	2660	1054	3714	-0.0022	0.0005	2.713e-05	0.256332	--
cg21344989	2	43864329	PLEKHH2	TSS200	2662	1054	3716	-0.0011	0.0003	2.867e-05	0.256332	--
cg23089549	11	44331905	ALX4	TSS200	2660	1057	3717	0.0054	0.0013	2.908e-05	0.256332	++
cg22790142	14	24769116	C14orf21;DHRS1;C14orf21;DHRS1	5'UTR;TSS1500;1stExon;TSS200	2659	1054	3713	-0.0006	0.0001	2.985e-05	0.256332	--
cg05771701	12	123259330	CCDC62;CCDC62;CCDC62	Body;Body;Body	2659	1051	3710	-0.0007	0.0002	3.019e-05	0.256332	--
cg10267855	11	67121112	POLD4;LOC100130987	TSS200;Body	2643	1054	3697	-0.0009	0.0002	3.037e-05	0.256332	--
cg18173908	7	129710284	KLHDC10	TSS200	2659	1048	3707	-0.0014	0.0003	3.149e-05	0.256332	--
cg13984393	1	52831958	CC2D1B	TSS200	2663	1051	3714	-0.0005	0.0001	3.242e-05	0.256332	--
cg11384281	3	64009226	PSMD6	TSS200	2661	1054	3715	-0.0006	0.0001	3.25e-05	0.256332	--
cg03960589	17	40840485	CNTNAP1	Body	2663	1051	3714	-0.0032	0.0008	3.286e-05	0.256332	--
cg12294506	8	6565850	AGPAT5	TSS200	2608	1001	3609	-0.0009	0.0002	3.299e-05	0.256332	--
cg18679324	5	85916067	COX7C	3'UTR	2652	1051	3703	0.0042	0.001	3.317e-05	0.256332	++
cg20185360	6	133119641	C6orf192;C6orf192	5'UTR;1stExon	2656	1052	3708	-0.0012	0.0003	3.338e-05	0.256332	--
cg01934142	4	39368026	RFC1	TSS200	2661	1048	3709	-0.0008	0.0002	3.56e-05	0.259279	--
cg21211480	17	41363774	TMEM106A	TSS200	2652	1040	3692	-0.0011	0.0003	3.562e-05	0.259279	--
cg24798115	7	149157735	ZNF777	5'UTR	2663	1054	3717	-0.0007	0.0002	3.601e-05	0.259279	--
cg24881202	1	11724943	FBXO6	5'UTR	2661	1057	3718	-0.0051	0.0012	3.652e-05	0.259279	--
cg10899904	8	74005557	C8orf84	TSS200	2659	1029	3688	-0.0012	0.0003	3.901e-05	0.271828	--
cg25626012	10	95721252	PIPSL	Body	2662	1052	3714	-0.0046	0.0011	4.156e-05	0.280489	--
cg04873147	13	73634369	KLF5	Body	2660	1034	3694	0.0019	0.0005	4.228e-05	0.280489	++
cg04985652	20	18568437	DTD1	TSS200	2661	1047	3708	-0.0028	0.0007	4.317e-05	0.280489	--
cg09124213	11	62432393	SNORA57;C11orf48;METTL12	TSS1500;Body;TSS1500	2659	1045	3704	-0.0007	0.0002	4.393e-05	0.280489	--
cg10767703	3	186524559	RFC4;RFC4	TSS200;TSS1500	2657	1054	3711	-0.0009	0.0002	4.398e-05	0.280489	--
cg17278249	12	76478805	NAP1L1;NAP1L1	TSS200;TSS200	2660	1055	3715	-0.0009	0.0002	4.585e-05	0.283985	--
cg05964622	7	1609908	PSMG3;KIAA1908;KIAA1908;KIAA1908;PSMG3	TSS1500;Body;Body;Body;TSS1500	2661	1054	3715	-0.0009	0.0002	4.607e-05	0.283985	--
cg07074390	21	40555500	PSMG1;PSMG1	TSS200;TSS200	2663	1047	3710	-0.0007	0.0002	5.041e-05	0.283985	--
cg01741924	16	31453406	ZNF843	5'UTR	2663	1053	3716	0.007	0.0017	5.154e-05	0.283985	++
cg26569144	5	170846504	FGF18	TSS200	2663	1055	3718	-0.0009	0.0002	5.156e-05	0.283985	--
cg01351037	15	85525384	PDE8A;PDE8A;PDE8A;PDE8A	5'UTR;5'UTR;1stExon;1stExon	2658	1051	3709	-0.0007	0.0002	5.166e-05	0.283985	--
cg20347626	2	25896320	DTNB;DTNB;DTNB;DTNB;DTNB;DTNB;DTNB;DTNB;DTNB;DTNB	1stExon;1stExon;1stExon;5'UTR;5'UTR;5'UTR;1stExon;5'UTR;1stExon;5'UTR	2649	1053	3702	-0.0007	0.0002	5.189e-05	0.283985	--
cg05297854	22	50623687	TRABD	TSS1500	2661	1035	3696	-0.0012	0.0003	5.257e-05	0.283985	--
cg15492422	19	2328553	SPPL2B;LSM7;SPPL2B	TSS200;Body;TSS200	2663	1051	3714	-0.0005	0.0001	5.26e-05	0.283985	--
cg18729886	14	61788339	PRKCH	TSS200	2663	1052	3715	-0.001	0.0003	5.282e-05	0.283985	--
cg14052221	9	80912058	PSAT1;PSAT1;PSAT1;PSAT1	1stExon;1stExon;5'UTR;5'UTR	2653	1039	3692	-0.0004	0.0001	5.283e-05	0.283985	--
cg04364453	2	10442941	HPCAL1;HPCAL1	TSS1500;TSS200	2663	1052	3715	-0.0005	0.0001	5.578e-05	0.295539	--
cg15260437	17	79430805	BAHCC1	Body	2662	1057	3719	-0.0061	0.0015	5.874e-05	0.295539	--
cg14719188	2	20851049	HS1BP3	TSS200	2658	1035	3693	-0.0006	0.0002	5.883e-05	0.295539	--
cg27088491	6	33362953	KIFC1	Body	2662	1056	3718	-0.0029	0.0007	5.939e-05	0.295539	--
cg00987513	1	145413337	HFE2;HFE2;HFE2;HFE2;HFE2;HFE2;HFE2;HFE2	1stExon;5'UTR;5'UTR;1stExon;1stExon;5'UTR;5'UTR;1stExon	2663	1055	3718	-0.004	0.001	6.049e-05	0.295539	--
cg12113561	17	36860216			2662	1055	3717	-0.0008	0.0002	6.147e-05	0.295539	+-
cg15598244	1	23696413	C1orf213;C1orf213;ZNF436;C1orf213	3'UTR;Body;TSS200;1stExon	2663	1050	3713	0.0068	0.0017	6.167e-05	0.295539	++
cg27530239	17	46909074	CALCOCO2	5'UTR	2663	1039	3702	0.0051	0.0013	6.287e-05	0.295539	+-
cg02660350	10	99186001	PGAM1	TSS200	2637	1051	3688	-0.0007	0.0002	6.387e-05	0.295539	--
cg01561160	8	98637229			2645	1032	3677	0.0021	0.0005	6.614e-05	0.295539	++
cg16860848	19	50269991	AP2A1;AP2A1	TSS200;TSS200	2663	1052	3715	-0.0009	0.0002	6.856e-05	0.295539	--
cg05862135	16	3074294	HCFC1R1;HCFC1R1;THOC6;HCFC1R1;THOC6;THOC6;THOC6	TSS200;TSS200;1stExon;TSS200;5'UTR;5'UTR;1stExon	2658	1040	3698	-0.0005	0.0001	6.883e-05	0.295539	--
cg03074872	20	45035404	ELMO2;ELMO2	TSS200;TSS200	2659	1046	3705	-0.0022	0.0005	6.917e-05	0.295539	--
cg17498424	22	42528123	CYP2D6;CYP2D6	TSS1500;TSS1500	2644	1042	3686	-0.0062	0.0016	6.937e-05	0.295539	--
cg00032419	17	27895566	TP53I13	TSS200	2650	1040	3690	-0.0006	0.0002	6.98e-05	0.295539	--
cg03546163	6	35654363	FKBP5;FKBP5;FKBP5;FKBP5	5'UTR;5'UTR;5'UTR;5'UTR	2658	1058	3716	0.0107	0.0027	7.081e-05	0.295539	++
cg15809694	7	150675516	KCNH2;KCNH2	TSS1500;TSS1500	2663	1052	3715	-0.0005	0.0001	7.174e-05	0.295539	--
cg10904972	11	119227328	USP2;USP2	3'UTR;3'UTR	2662	1053	3715	-0.0007	0.0002	7.303e-05	0.295539	--
cg21820436	3	130613407	ATP2C1;ATP2C1;ATP2C1;ATP2C1	TSS200;TSS200;TSS200;TSS200	2658	1051	3709	-0.0006	0.0001	7.311e-05	0.295539	--
cg11457695	19	59030948	ZBTB45	TSS200	2660	1052	3712	-0.0011	0.0003	7.337e-05	0.295539	--
cg17465133	8	12809420	C8orf79	5'UTR	2662	1047	3709	-0.0009	0.0002	7.396e-05	0.295539	--
cg04021745	1	236445389	ERO1LB	TSS200	2660	1042	3702	-0.0004	0.0001	7.521e-05	0.295539	--
cg02516845	16	84076320	SLC38A8	TSS1500	2662	1055	3717	-0.0071	0.0018	7.547e-05	0.295539	--
cg13759513	20	48448154	SLC9A8	Body	2659	1025	3684	0.0121	0.0031	7.552e-05	0.295539	++
cg05021796	5	180632114	TRIM7;TRIM7;TRIM7;TRIM7;TRIM7;TRIM7;TRIM7	1stExon;1stExon;TSS1500;TSS1500;5'UTR;5'UTR;TSS1500	2661	1035	3696	-0.0005	0.0001	7.569e-05	0.295539	--
cg15682575	4	88732782	IBSP	Body	2662	1052	3714	-0.005	0.0013	7.69e-05	0.295539	--
cg11032268	7	5632272	FSCN1	TSS200	2661	1041	3702	-0.0008	0.0002	7.756e-05	0.295539	--
cg06954540	11	65686660	C11orf68;C11orf68;DRAP1	TSS200;TSS200;TSS200	2663	1052	3715	-0.0005	0.0001	7.884e-05	0.295539	--
cg00856002	1	28198968	C1orf38;C1orf38;C1orf38	TSS200;TSS200;TSS200	2662	1053	3715	-0.0007	0.0002	7.966e-05	0.295539	--
cg09490756	16	86665961			2657	1043	3700	-0.0023	0.0006	8.099e-05	0.295539	--

## Sheet: S8
Table S8. Handedness, EWAS, NTR adults, RH vs LH (basic model)
	CHR	Position	Gene	Gene.region	Weight	Estimate	SE	p.value	q.value	Direction
cg16661464	18	61037759			2665	-0.00608933	0.00135424	6.9084e-06	0.875162	--
cg14235273	17	47295142	ABI3;ABI3	Body;Body	2665	-0.00632078	0.00144238	1.175e-05	0.875162	--
cg24630209	17	60744606	MRC2	Body	2665	-0.00399989	0.00092469	1.52078e-05	0.875162	--
cg19878838	4	77135506	SCARB2	TSS1500	2665	0.00417379	0.000973087	1.79295e-05	0.875162	++
cg13719901	3	46608139	LRRC2;LRRC2	5'UTR;TSS200	2665	0.00740223	0.00174129	2.12818e-05	0.875162	++
cg16532893	10	38146893	ZNF248	TSS1500	2665	0.00226063	0.000536829	2.54152e-05	0.875162	++
cg27530239	17	46909074	CALCOCO2	5'UTR	2665	0.00543516	0.00129439	2.6808e-05	0.875162	++
cg21611775	3	11058836	SLC6A1	5'UTR	2665	-0.0030187	0.000722376	2.92979e-05	0.875162	--
cg20832722	2	198523055	RFTN2	Body	2665	-0.00723771	0.00173542	3.03818e-05	0.875162	--
cg03333377	11	93277841	C11orf75	TSS1500	2665	0.00663693	0.00159544	3.18326e-05	0.875162	++
cg15682575	4	88732782	IBSP	Body	2665	-0.00556621	0.00134031	3.28239e-05	0.875162	--
cg26386472	12	122277360			2665	0.00208167	0.000503838	3.60198e-05	0.875162	++
cg24881202	1	11724943	FBXO6	5'UTR	2665	-0.0054848	0.00133186	3.81946e-05	0.875162	--
cg04738301	12	96184580	NTN4	TSS200	2665	-0.00200471	0.000489849	4.2673e-05	0.875162	--
cg03960589	17	40840485	CNTNAP1	Body	2665	-0.00320801	0.000784722	4.34961e-05	0.875162	--
cg26444348	19	6530187	TNFSF9	TSS1500	2665	-0.00407223	0.00099614	4.35095e-05	0.875162	--
cg10587401	1	120292140	HMGCS2;HMGCS2	3'UTR;3'UTR	2665	-0.00444135	0.00109542	5.0248e-05	0.875162	--
cg27092705	18	48556386	SMAD4	TSS200	2665	0.00199335	0.000492923	5.25622e-05	0.875162	++
cg09132240	12	124922727	NCOR2;NCOR2	Body;Body	2665	-0.00462457	0.00114408	5.29618e-05	0.875162	--
cg09107912	6	159590059	FNDC1	TSS1500	2665	0.00284901	0.000705592	5.39655e-05	0.875162	++
cg15466505	17	77983884	TBC1D16	Body	2665	-0.00361325	0.000896682	5.58768e-05	0.875162	--
cg18261223	5	32711517	NPR 3,00	TSS200	2665	0.00258202	0.000642686	5.88087e-05	0.875162	++
cg23990334	8	141046436	TRAPPC9;TRAPPC9	Body;Body	2665	-0.00348419	0.000868916	6.07676e-05	0.875162	--
cg23732384	19	7968566	MAP2K7	TSS200	2665	0.00109026	0.000271972	6.10471e-05	0.875162	++
cg01741924	16	31453406	ZNF843	5'UTR	2665	0.00693202	0.0017318	6.26003e-05	0.875162	++
cg07129212	7	6487749	DAGLB;DAGLB	TSS200;TSS200	2665	-0.00180642	0.000452844	6.63362e-05	0.875162	--
cg14989308	19	17357472	NR2F6	TSS1500	2665	-0.0036619	0.000918071	6.644e-05	0.875162	--
cg24973591	4	10079421	WDR1;WDR1	Body;Body	2665	-0.00405567	0.00102155	7.18422e-05	0.875162	--
cg00987513	1	145413337	HFE2;HFE2;HFE2;HFE2;HFE2;HFE2;HFE2;HFE2	1stExon;5'UTR;5'UTR;1stExon;1stExon;5'UTR;5'UTR;1stExon	2665	-0.00404162	0.00102071	7.50687e-05	0.875162	--
cg11887124	14	101341331	MIR665	TSS200	2665	-0.00413737	0.00104534	7.56021e-05	0.875162	--
cg02351223	22	43253208	ARFGAP3;ARFGAP3;ARFGAP3;ARFGAP3	1stExon;5'UTR;1stExon;5'UTR	2665	-0.00131013	0.000332135	7.99387e-05	0.875162	--
cg24113439	19	11216129	LDLR	Body	2665	-0.00250852	0.000636726	8.15768e-05	0.875162	--
cg27088491	6	33362953	KIFC1	Body	2665	-0.00282043	0.000716556	8.28206e-05	0.875162	--
cg04005938	7	148334417			2665	-0.00850568	0.00216612	8.61259e-05	0.875162	--
cg06618322	15	85923867	AKAP13;AKAP13	TSS200;TSS200	2665	-0.00310826	0.000793658	8.98921e-05	0.875162	--
cg05258027	6	134273465	TBPL1	TSS1500	2665	0.00230453	0.000588878	9.09982e-05	0.875162	++
cg09490756	16	86665961			2665	-0.00227336	0.000581368	9.21598e-05	0.875162	--
cg09776094	16	89357477	ANKRD11	Body	2665	-0.0026829	0.000689684	0.000100229	0.875162	--
cg05343755	12	31800175	C12orf72;C12orf72	5'UTR;1stExon	2665	0.00333829	0.000858467	0.000100797	0.875162	++
cg13885357	12	53184041	KRT3	Body	2665	-0.00696298	0.00179118	0.000101333	0.875162	--
cg08619712	11	2288051			2665	-0.00475375	0.00122364	0.000102356	0.875162	--
cg16619935	16	2037439	GFER	3'UTR	2665	-0.00305336	0.000786495	0.000103501	0.875162	--
cg09340403	6	138247491			2665	0.00813925	0.002097	0.000103869	0.875162	++
cg25973273	6	56407538	DST;DST;DST;DST;DST	Body;Body;Body;Body;Body	2665	0.00141208	0.00036388	0.000104195	0.875162	++
cg23089549	11	44331905	ALX4	TSS200	2665	0.00536868	0.00138658	0.000107993	0.875162	++
cg02861293	1	160011013	KCNJ10	3'UTR	2665	-0.00379437	0.000980439	0.000108803	0.875162	--
cg26633994	19	57791739	ZNF460	TSS200	2665	0.00154725	0.000400502	0.000111869	0.875162	++
cg17063910	11	433316	ANO9	Body	2665	-0.00508832	0.00132289	0.000119882	0.875162	--
cg08050663	14	77725701	TMEM63C	3'UTR	2665	-0.00310431	0.000807404	0.000120651	0.875162	--
cg11805083	2	97218336	ARID5A	3'UTR	2665	-0.00378216	0.000984161	0.000121526	0.875162	--
cg18679324	5	85916067	COX7C	3'UTR	2665	0.00411695	0.00107182	0.000122494	0.875162	++
cg18951256	17	6882421			2665	-0.00328197	0.000854532	0.000122702	0.875162	--
cg27073809	11	108536195	DDX10	Body	2665	0.00317105	0.000826017	0.000123557	0.875162	++
cg25626012	10	95721252	PIPSL	Body	2665	-0.00456607	0.00118964	0.00012394	0.875162	--
cg21626523	7	120628113	C7orf58;C7orf58	TSS1500;TSS1500	2665	0.00352663	0.00091976	0.000125929	0.875162	++
cg25956012	20	35086635	DLGAP4	Body	2665	0.0038646	0.00100802	0.000126155	0.875162	++
cg04985652	20	18568437	DTD1	TSS200	2665	-0.00339881	0.00088677	0.000126694	0.875162	--
cg14039020	8	99989605			2665	-0.00900534	0.00235139	0.000128252	0.875162	--
cg11650763	5	92930530			2665	-0.0058264	0.00152542	0.0001337	0.875162	--
cg05823563	9	104249936	C9orf125	TSS1500	2665	0.00669796	0.00175429	0.00013451	0.875162	++
cg21211243	7	42951746	C7orf25;C7orf25	TSS200;TSS200	2665	-0.00252297	0.000660841	0.000134637	0.875162	--
cg01196158	1	93912688	FNBP1L;FNBP1L;FNBP1L	TSS1500;TSS1500;TSS1500	2665	0.0111933	0.00293544	0.000137192	0.877386	++
cg17076539	3	57204284			2665	-0.0011007	0.000289281	0.000141839	0.892066	--
cg00099766	6	90120705	RRAGD	Body	2665	0.00664522	0.00175472	0.000152445	0.892066	++
cg06241208	11	30344200	C11orf46	TSS1500	2665	0.0147571	0.00389777	0.000153064	0.892066	++
cg24440625	10	126810216	CTBP2;CTBP2	5'UTR;5'UTR	2665	-0.00270854	0.00071555	0.000153545	0.892066	--
cg08229018	4	119274133	PRSS12	TSS1500	2665	0.00426143	0.00112621	0.000154419	0.892066	++
cg19468029	3	46854231			2665	0.00243774	0.000644906	0.000156836	0.892066	++
cg08506053	1	151737992	OAZ3;OAZ3	Body;TSS1500	2665	0.00512737	0.00135706	0.00015791	0.892066	++
cg10421984	20	30945843	ASXL1;ASXL1	TSS1500;TSS1500	2665	0.00164944	0.000436612	0.00015821	0.892066	++
cg09989681	11	1892043	LSP1;LSP1;LSP1;LSP1	5'UTR;TSS200;TSS200;Body	2665	-0.00700158	0.00185534	0.00016081	0.892066	--
cg07660750	11	31828715	PAX6;PAX6;PAX6	5'UTR;5'UTR;5'UTR	2665	-0.00729185	0.00193318	0.000161986	0.892066	--
cg00396520	2	70314546	PCBP1	TSS200	2665	0.00294704	0.000782737	0.00016652	0.904475	++
cg15079934	11	1892307	LSP1;LSP1;LSP1;LSP1;LSP1	5'UTR;5'UTR;Body;1stExon;5'UTR	2665	-0.00610529	0.00162457	0.000171209	0.904913	--
ch.15.1497565F	15	88581122	NTRK3;NTRK3;NTRK3	Body;Body;Body	2665	0.00217139	0.000578071	0.000172469	0.904913	++
cg05941247	12	131943683			2665	-0.00281792	0.000751811	0.000178127	0.904913	--
cg01481569	12	29673649	TMTC1	Body	2665	-0.00457635	0.00122161	0.000179558	0.904913	--
cg24911891	8	142405051			2665	-0.0145309	0.00388538	0.000184089	0.904913	--
cg11985287	19	2556805	GNG7	5'UTR	2665	-0.00418569	0.00111991	0.000185847	0.904913	--
cg01472538	16	58549086	SETD6;SETD6	TSS1500;TSS1500	2665	-0.00213884	0.000572375	0.000186395	0.904913	--
cg21605540	17	17485823	PEMT;PEMT	Body;TSS200	2665	-0.00303972	0.000817686	0.000201231	0.904913	--
cg10938336	10	78676267	KCNMA1;KCNMA1;KCNMA1;KCNMA1	Body;Body;Body;Body	2665	-0.00383762	0.00103257	0.000201937	0.904913	--
cg22228748	1	99385800	LPPR5;LPPR5	Body;Body	2665	-0.00293896	0.000791868	0.000206091	0.904913	--
cg10786087	13	99092272	FARP1	Body	2665	-0.00134455	0.00036304	0.000212562	0.904913	--
cg07546433	8	102063914			2665	0.00422856	0.00114226	0.000213958	0.904913	++
cg08360738	19	35597447	LOC100128675;LOC100128675	TSS1500;TSS1500	2665	0.00525614	0.00142048	0.00021538	0.904913	++
cg16788099	11	67141792	LOC100130987;CLCF1;CLCF1	Body;TSS1500;TSS200	2665	0.00224211	0.000606226	0.000216907	0.904913	++
cg23036426	1	10093530	UBE4B;UBE4B;UBE4B;UBE4B	5'UTR;1stExon;5'UTR;1stExon	2665	0.00219648	0.000594847	0.000222048	0.904913	++
cg09177131	1	114696462	SYT6;SYT6	5'UTR;1stExon	2665	-0.00140084	0.000379626	0.000224216	0.904913	--
cg05904808	5	57790494	GAPT	Body	2665	0.00439742	0.00119211	0.000225331	0.904913	++
cg22987116	6	37461296	C6orf129	Body	2665	-0.0029009	0.0007875	0.000229892	0.904913	--
cg24571794	5	179564268	RASGEF1C	Body	2665	-0.00255022	0.000693192	0.000234188	0.904913	--
cg03052632	12	57634626	NDUFA4L2	TSS200	2665	-0.00412672	0.00112192	0.000234826	0.904913	--
cg15046735	14	78174352	ALKBH1;C14orf156;ALKBH1	1stExon;TSS200;5'UTR	2665	0.00114295	0.000310742	0.000234962	0.904913	++
cg21796427	17	61562170	ACE;ACE	TSS200;Body	2665	-0.00209707	0.00057037	0.000236293	0.904913	--
cg18496543	3	87016674	VGLL3	Body	2665	-0.00334339	0.000909889	0.000238311	0.904913	--
cg26209816	7	978305	ADAP1	Body	2665	0.00186238	0.000507254	0.000241141	0.904913	++
cg23130731	10	105978651	MIR609;C10orf79	TSS200;Body	2665	0.00660437	0.0018011	0.000245555	0.904913	++
cg06617692	9	80262196	GNA14	Body	2665	-0.00265107	0.000723228	0.000246744	0.904913	--
cg16212145	14	25103730	GZMB	TSS1500	2665	-0.00579112	0.00158007	0.000247246	0.904913	--

## Sheet: S9
Table S9. Handedness, EWAS, NTR adults, RH vs LH (adjusted model)
	CHR	Position	Gene	Gene.region	Weight	Estimate	SE	p.value	q.value	Direction
cg04738301	12	96184580	NTN4	TSS200	2618	-0.00220513	0.000484153	5.24809e-06	0.890617	--
cg14235273	17	47295142	ABI3;ABI3	Body;Body	2618	-0.00652118	0.00145174	7.0561e-06	0.890617	--
cg13719901	3	46608139	LRRC2;LRRC2	5'UTR;TSS200	2618	0.00772024	0.00175899	1.13859e-05	0.890617	++
cg24630209	17	60744606	MRC2	Body	2618	-0.00404151	0.000931488	1.43288e-05	0.890617	--
cg16661464	18	61037759			2618	-0.00594527	0.00137615	1.55879e-05	0.890617	--
cg03333377	11	93277841	C11orf75	TSS1500	2618	0.00692803	0.0016131	1.74815e-05	0.890617	++
cg09107912	6	159590059	FNDC1	TSS1500	2618	0.00303368	0.000708023	1.82967e-05	0.890617	++
cg19878838	4	77135506	SCARB2	TSS1500	2618	0.00417784	0.000977913	1.93551e-05	0.890617	++
cg21211243	7	42951746	C7orf25;C7orf25	TSS200;TSS200	2618	-0.00277202	0.000650438	2.02804e-05	0.890617	--
cg27530239	17	46909074	CALCOCO2	5'UTR	2618	0.00549105	0.00130887	2.72569e-05	0.893602	++
cg16532893	10	38146893	ZNF248	TSS1500	2618	0.00228188	0.000545875	2.91218e-05	0.893602	++
cg26444348	19	6530187	TNFSF9	TSS1500	2618	-0.00419354	0.00100479	2.99866e-05	0.893602	--
cg06618322	15	85923867	AKAP13;AKAP13	TSS200;TSS200	2618	-0.00328154	0.000787601	3.09316e-05	0.893602	--
cg21611775	3	11058836	SLC6A1	5'UTR	2618	-0.00302727	0.000729394	3.31907e-05	0.893602	--
cg09340403	6	138247491			2618	0.00854973	0.00207648	3.83141e-05	0.893602	++
cg03960589	17	40840485	CNTNAP1	Body	2618	-0.00322511	0.000787301	4.19603e-05	0.893602	--
cg15682575	4	88732782	IBSP	Body	2618	-0.00547736	0.00134681	4.76374e-05	0.893602	--
cg24881202	1	11724943	FBXO6	5'UTR	2618	-0.0054351	0.00134142	5.08387e-05	0.893602	--
cg23990334	8	141046436	TRAPPC9;TRAPPC9	Body;Body	2618	-0.00356613	0.000881965	5.2685e-05	0.893602	--
cg26386472	12	122277360			2618	0.00204826	0.000507113	5.36652e-05	0.893602	++
cg08050663	14	77725701	TMEM63C	3'UTR	2618	-0.00329459	0.000820519	5.93833e-05	0.893602	--
cg11650763	5	92930530			2618	-0.00607025	0.00151737	6.3207e-05	0.893602	--
cg27088491	6	33362953	KIFC1	Body	2618	-0.00290182	0.000725465	6.33559e-05	0.893602	--
cg24113439	19	11216129	LDLR	Body	2618	-0.00256601	0.000642006	6.41878e-05	0.893602	--
cg14989308	19	17357472	NR2F6	TSS1500	2618	-0.00372322	0.000931561	6.42159e-05	0.893602	--
cg25956012	20	35086635	DLGAP4	Body	2618	0.00305086	0.000764456	6.58243e-05	0.893602	++
cg27092705	18	48556386	SMAD4	TSS200	2618	0.00200031	0.000501321	6.60539e-05	0.893602	++
cg04005938	7	148334417			2618	-0.00862829	0.00216714	6.85044e-05	0.893602	--
cg23089549	11	44331905	ALX4	TSS200	2618	0.00556407	0.00139829	6.91482e-05	0.893602	++
cg05258027	6	134273465	TBPL1	TSS1500	2618	0.00237284	0.000597961	7.24127e-05	0.893602	++
cg00396520	2	70314546	PCBP1	TSS200	2618	0.00312102	0.000791024	7.96201e-05	0.893602	++
cg01741924	16	31453406	ZNF843	5'UTR	2618	0.00690961	0.00175209	8.02565e-05	0.893602	++
cg25973273	6	56407538	DST;DST;DST;DST;DST	Body;Body;Body;Body;Body	2618	0.00144088	0.000366524	8.45183e-05	0.893602	++
cg02351223	22	43253208	ARFGAP3;ARFGAP3;ARFGAP3;ARFGAP3	1stExon;5'UTR;1stExon;5'UTR	2618	-0.00132656	0.000338415	8.85801e-05	0.893602	--
cg24973591	4	10079421	WDR1;WDR1	Body;Body	2618	-0.00394936	0.00100761	8.87251e-05	0.893602	--
cg20832722	2	198523055	RFTN2	Body	2618	-0.00682558	0.00174386	9.07542e-05	0.893602	--
cg09132240	12	124922727	NCOR2;NCOR2	Body;Body	2618	-0.00448166	0.00114654	9.27377e-05	0.893602	--
cg15466505	17	77983884	TBC1D16	Body	2618	-0.00353925	0.000908342	9.76396e-05	0.893602	--
cg09989681	11	1892043	LSP1;LSP1;LSP1;LSP1	5'UTR;TSS200;TSS200;Body	2618	-0.00721437	0.00185266	9.85751e-05	0.893602	--
cg10938336	10	78676267	KCNMA1;KCNMA1;KCNMA1;KCNMA1	Body;Body;Body;Body	2618	-0.00402205	0.00103388	0.000100137	0.893602	--
cg08506053	1	151737992	OAZ3;OAZ3	Body;TSS1500	2618	0.00533209	0.00137242	0.000102257	0.893602	++
cg15079934	11	1892307	LSP1;LSP1;LSP1;LSP1;LSP1	5'UTR;5'UTR;Body;1stExon;5'UTR	2618	-0.00630954	0.00162827	0.000106625	0.893602	--
cg07129212	7	6487749	DAGLB;DAGLB	TSS200;TSS200	2618	-0.00176866	0.000457295	0.000109891	0.893602	--
cg10786087	13	99092272	FARP1	Body	2618	-0.00141668	0.00036703	0.000113452	0.893602	--
cg11887124	14	101341331	MIR665	TSS200	2618	-0.0040677	0.00105595	0.000117078	0.893602	--
cg09490756	16	86665961			2618	-0.00226605	0.000588932	0.000119218	0.893602	--
cg17063910	11	433316	ANO9	Body	2618	-0.00514358	0.00133929	0.000122766	0.893602	--
cg00987513	1	145413337	HFE2;HFE2;HFE2;HFE2;HFE2;HFE2;HFE2;HFE2	1stExon;5'UTR;5'UTR;1stExon;1stExon;5'UTR;5'UTR;1stExon	2618	-0.0039568	0.00103085	0.000123848	0.893602	--
cg16212145	14	25103730	GZMB	TSS1500	2618	-0.00609666	0.00159006	0.000125951	0.893602	--
cg05343755	12	31800175	C12orf72;C12orf72	5'UTR;1stExon	2618	0.00330547	0.000862267	0.000126354	0.893602	++
cg18679324	5	85916067	COX7C	3'UTR	2618	0.00418058	0.00109086	0.000126915	0.893602	++
cg22228748	1	99385800	LPPR5;LPPR5	Body;Body	2618	-0.00306591	0.00080022	0.000127451	0.893602	--
cg09776094	16	89357477	ANKRD11	Body	2618	-0.00266405	0.000695558	0.000128098	0.893602	--
cg00099766	6	90120705	RRAGD	Body	2618	0.00677904	0.00177096	0.000129242	0.893602	++
cg11923957	19	10530257	PDE4A	TSS1500	2618	0.0045826	0.0012	0.000134077	0.893602	++
cg18261223	5	32711517	NPR 3,00	TSS200	2618	0.00253263	0.000663476	0.000134968	0.893602	++
cg27073809	11	108536195	DDX10	Body	2618	0.00315217	0.000825977	0.000135472	0.893602	++
cg07546433	8	102063914			2618	0.00432802	0.00113617	0.000139359	0.893602	++
cg10421984	20	30945843	ASXL1;ASXL1	TSS1500;TSS1500	2618	0.00167576	0.000441398	0.000146766	0.893602	++
cg14039020	8	99989605			2618	-0.00896211	0.00236207	0.000148136	0.893602	--
cg04985652	20	18568437	DTD1	TSS200	2618	-0.00338266	0.00089257	0.000150768	0.893602	--
cg02861293	1	160011013	KCNJ10	3'UTR	2618	-0.00374345	0.000987877	0.000151022	0.893602	--
cg06307176	5	131281290			2618	0.00457252	0.00120869	0.000154918	0.893602	++
cg05941247	12	131943683			2618	-0.00286166	0.000757435	0.000158036	0.893602	--
cg05823563	9	104249936	C9orf125	TSS1500	2618	0.00669362	0.00177311	0.000159965	0.893602	++
cg18173058	12	114838359	TBX5;TBX5;TBX5;TBX5	Body;Body;Body;Body	2618	0.00454793	0.0012053	0.000161125	0.893602	++
cg24440625	10	126810216	CTBP2;CTBP2	5'UTR;5'UTR	2618	-0.00273035	0.000723649	0.000161278	0.893602	--
cg16619935	16	2037439	GFER	3'UTR	2618	-0.00294784	0.000783739	0.000169062	0.893602	--
cg25626012	10	95721252	PIPSL	Body	2618	-0.00454038	0.0012081	0.000171079	0.893602	--
cg08619712	11	2288051			2618	-0.0046255	0.00123137	0.000172386	0.893602	--
cg02888633	6	126661628	C6orf173	Body	2618	-0.00222395	0.000592416	0.000174007	0.893602	--
cg05904808	5	57790494	GAPT	Body	2618	0.00452027	0.00120452	0.000174892	0.893602	++
cg09941884	16	891400			2618	0.00553023	0.00147615	0.000179391	0.893602	++
cg01472538	16	58549086	SETD6;SETD6	TSS1500;TSS1500	2618	-0.00218838	0.000584505	0.000181116	0.893602	--
cg13885357	12	53184041	KRT3	Body	2618	-0.00678272	0.00181449	0.000185422	0.893602	--
cg07769421	17	80816851	TBCD	Body	2618	-0.0062774	0.00168248	0.000190683	0.893602	--
cg16956876	6	31746820	VARS	Body	2618	-0.00313793	0.000844145	0.000201375	0.893602	--
cg07065759	2	198017462	ANKRD44	Body	2618	0.00963169	0.00259476	0.000205641	0.893602	++
cg16788099	11	67141792	LOC100130987;CLCF1;CLCF1	Body;TSS1500;TSS200	2618	0.00227791	0.000613747	0.000206053	0.893602	++
cg08846221	1	10541698	PEX14	Body	2618	-0.00243201	0.000655738	0.000208235	0.893602	--
cg26363167	8	42010494	AP3M2;AP3M2;AP3M2;AP3M2	1stExon;5'UTR;5'UTR;1stExon	2618	-0.00132956	0.000358604	0.000209224	0.893602	--
cg19468029	3	46854231			2618	0.00237665	0.000641067	0.000209446	0.893602	++
cg09177131	1	114696462	SYT6;SYT6	5'UTR;1stExon	2618	-0.00142992	0.000386032	0.000212109	0.893602	--
cg25535047	20	61174805			2618	-0.00887595	0.00239696	0.000213062	0.893602	--
cg07055330	2	239986535	HDAC4	Body	2618	-0.00255739	0.000690757	0.000213651	0.893602	--
cg08606497	8	28244769	ZNF395	TSS1500	2618	0.00555939	0.00150275	0.000216039	0.893602	++
cg06241208	11	30344200	C11orf46	TSS1500	2618	0.0144989	0.00391979	0.00021655	0.893602	++
cg08229018	4	119274133	PRSS12	TSS1500	2618	0.00418267	0.00113546	0.000229883	0.893602	++
cg07236781	1	25291041	RUNX3	1stExon	2618	-0.00634565	0.00172371	0.000231969	0.893602	--
cg19119538	10	21822272	MLLT10;MLLT10	TSS1500;TSS1500	2618	0.00578286	0.00157239	0.000235309	0.893602	++
cg23130731	10	105978651	MIR609;C10orf79	TSS200;Body	2618	0.0066121	0.00179945	0.000238295	0.893602	++
cg18911129	12	56470635			2618	-0.00331168	0.000901885	0.0002407	0.893602	--
cg24911891	8	142405051			2618	-0.0143506	0.00391157	0.00024372	0.893602	--
cg13997759	19	39230902	CAPN12	Body	2618	-0.00635474	0.00173223	0.00024394	0.893602	--
cg19088553	6	101901884	GRIK2;GRIK2;GRIK2	Body;Body;Body	2618	-0.00696248	0.00189793	0.000244024	0.893602	--
cg10587401	1	120292140	HMGCS2;HMGCS2	3'UTR;3'UTR	2618	-0.0040417	0.00110221	0.000245505	0.893602	--
cg08245702	2	71127349	VAX2	TSS1500	2618	0.00326019	0.000890279	0.00025027	0.893602	++
cg17832212	1	33367304	TMEM54	TSS1500	2618	0.00440238	0.00120249	0.000251175	0.893602	++
cg22121647	7	134845376	TMEM140	5'UTR	2618	0.00535692	0.00146343	0.000251697	0.893602	++
cg08360738	19	35597447	LOC100128675;LOC100128675	TSS1500;TSS1500	2618	0.0052471	0.00143347	0.0002518	0.893602	++

## Sheet: S10
Table S10. Handedness, EWAS, ALSPAC adults, RH vs LH (basic model)
	CHR	Position	Gene	Gene.region	Weight	Estimate	SE	p.value	q.value	Direction
cg19915181	14	81905381			1232	-0.0225409	0.0047402	2.22131e-06	1	--
cg13862631	4	78979894	FRAS1;FRAS1	Body;Body	1229	0.00835809	0.00179535	3.59281e-06	1	++
cg08275602	12	29935873	TMTC1	5'UTR	1215	-0.00360182	0.00078342	4.73218e-06	1	--
cg20947268	22	41682278	RANGAP1	TSS200	1227	-0.0022349	0.000488946	5.36019e-06	1	--
cg15935227	7	157934685	PTPRN2;PTPRN2;PTPRN2	Body;Body;Body	1201	-0.0460325	0.0102601	7.94985e-06	1	--
cg24098326	10	123923050	TACC2;TACC2;TACC2;TACC2	Body;TSS200;TSS200;Body	1222	-0.000969354	0.000216272	8.10132e-06	1	--
cg12113561	17	36860216			1228	-0.000893067	0.000199668	8.45409e-06	1	--
cg13934606	12	57610705	NXPH4;NXPH4	5'UTR;1stExon	1226	-0.00135361	0.000303249	8.81508e-06	1	--
cg12365107	3	52720035	GNL3;GNL3;GNL3;PBRM1;GNL3;GNL3;GNL3	1stExon;5'UTR;5'UTR;TSS200;1stExon;5'UTR;1stExon	1191	-0.000539207	0.000121086	9.27879e-06	1	--
cg09433910	17	1626509	WDR81;WDR81;WDR81	TSS1500;Body;5'UTR	1211	0.00641293	0.00145768	1.18329e-05	1	++
cg04821107	4	170947779	MFAP3L	TSS1500	1220	-0.00126428	0.000288089	1.24231e-05	1	--
cg17366378	15	45458906			1221	-0.000815272	0.000185971	1.26864e-05	1	--
cg06812522	12	569221	B4GALNT3	TSS1500	1219	-0.001399	0.000320142	1.35107e-05	1	--
cg06699638	8	37963308	ASH2L;ASH2L	Body;TSS200	1225	-0.00120082	0.00027619	1.49182e-05	1	--
cg16852837	18	51750955	MBD2;MBD2;MBD2;MBD2	1stExon;1stExon;5'UTR;5'UTR	1224	-0.000568429	0.00013144	1.655e-05	1	--
cg05017302	11	125315788	FEZ1	3'UTR	1224	0.0177936	0.00411789	1.68176e-05	1	++
cg05877109	14	23775794	BCL2L2	TSS1500	1229	0.0129603	0.00301677	1.87885e-05	1	++
cg00746864	17	65373877	PITPNC1;PITPNC1	TSS200;TSS200	1224	-0.00108302	0.000252256	1.90256e-05	1	--
cg13198297	17	18046564	MYO15A	Body	1231	-0.0271816	0.00633711	1.93622e-05	1	--
cg16255150	14	73924775	NUMB;NUMB;NUMB;NUMB	5'UTR;5'UTR;5'UTR;5'UTR	1220	-0.00313121	0.000734329	2.16631e-05	1	--
cg03907864	22	41865051	ACO2;PHF5A	TSS200;TSS1500	1225	-0.000722178	0.000169665	2.23882e-05	1	--
cg03983811	10	99400441	PI4K2A	TSS200	1227	-0.000753862	0.000177175	2.25441e-05	1	--
cg10943348	15	72668568	HEXA;C15orf34	TSS200;Body	1229	-0.00184066	0.000432671	2.26122e-05	1	--
cg01878788	6	33176342	RING1;RING1	1stExon;5'UTR	1204	-0.000900124	0.000212442	2.44184e-05	1	--
cg23417677	2	238289824	COL6A3;COL6A3;COL6A3;COL6A3;COL6A3	Body;Body;Body;Body;Body	1214	0.00288303	0.000686401	2.86635e-05	1	++
cg02850812	13	46961666	C13orf18	TSS200	1216	-0.00136704	0.000325592	2.88561e-05	1	--
cg17178220	1	172114068	DNM3;DNM3;MIR199A2	Body;Body;TSS1500	1230	-0.0173314	0.00412977	2.90771e-05	1	--
cg20266894	11	15960076			1219	-0.020251	0.00483292	2.99283e-05	1	--
cg08658621	10	133999287	DPYSL4	TSS1500	1205	-0.000928007	0.000221493	3.00095e-05	1	--
cg05759718	1	50489596	AGBL4;AGBL4	1stExon;5'UTR	1125	0.00255039	0.000608574	3.00358e-05	1	++
cg25715328	19	9649297	ZNF426;ZNF426	5'UTR;1stExon	1225	-0.000666864	0.000159425	3.08775e-05	1	--
cg05070518	17	7555322	ATP1B2	Body	1217	0.00742311	0.00177994	3.26105e-05	1	++
cg08713568	1	91195504			1228	0.0231894	0.00556253	3.28112e-05	1	++
cg03611732	10	21785697	C10orf114;MIR1915	1stExon;TSS200	1227	-0.000533915	0.000128162	3.32315e-05	1	--
cg09493652	7	97601644	MGC72080	TSS200	1221	-0.00135609	0.000326217	3.45465e-05	1	--
cg24375895	1	247374146			1216	-0.00112711	0.000271531	3.5472e-05	1	--
cg21904595	2	61991516			1229	-0.000795823	0.000191826	3.5797e-05	1	--
cg23678114	17	43212777	ACBD4;ACBD4;ACBD4;ACBD4;ACBD4	TSS1500;TSS1500;5'UTR;TSS1500;TSS1500	1221	-0.00221214	0.000534019	3.67866e-05	1	--
cg12527384	11	123525060	SCN3B;SCN3B;SCN3B;SCN3B	1stExon;5'UTR;1stExon;5'UTR	1222	-0.000951815	0.000229865	3.70498e-05	1	--
cg27182106	3	128417740			1223	0.0133411	0.00322783	3.82773e-05	1	++
cg15175129	12	65672052	MSRB3;MSRB3	TSS1500;TSS1500	1231	0.0232902	0.00563972	3.88363e-05	1	++
cg02362686	1	150521404	ADAMTSL4;ADAMTSL4	TSS1500;TSS1500	1229	-0.000751943	0.000182619	4.09113e-05	1	--
cg13986501	9	115142201	HSDL2	TSS200	1226	-0.000848456	0.000206493	4.24607e-05	1	--
cg06123714	11	48000611	PTPRJ;PTPRJ	TSS1500;TSS1500	1228	0.0140971	0.00343532	4.34298e-05	1	++
cg26084005	2	241760190	KIF1A	TSS1500	1217	-0.000672758	0.000164034	4.38702e-05	1	--
cg06107469	12	56862350	SPRYD4;SPRYD4	1stExon;5'UTR	1226	-0.000789314	0.000192466	4.39002e-05	1	--
cg25321556	11	64418907	NRXN2;NRXN2	Body;Body	1230	0.0238916	0.00582594	4.39225e-05	1	++
cg01065033	6	170863692	PSMB1;TBP	TSS1500;5'UTR	1218	-0.000672772	0.000164215	4.47088e-05	1	--
cg17278249	12	76478805	NAP1L1;NAP1L1	TSS200;TSS200	1228	-0.000914139	0.000223417	4.56974e-05	1	--
cg21239265	7	74489542	WBSCR16	1stExon	1220	-0.00107304	0.000262262	4.57423e-05	1	--
cg11153969	1	207277031	C4BPA	TSS1500	1217	0.00602036	0.00147322	4.67261e-05	1	++
cg18593717	1	156722068	HDGF;HDGF;HDGF	TSS200;TSS1500;1stExon	1217	-0.000477675	0.000116899	4.67867e-05	1	--
cg09095818	3	178969459	KCNMB3;KCNMB3;KCNMB3;KCNMB3;KCNMB3;KCNMB3;KCNMB3	1stExon;TSS200;Body;Body;5'UTR;Body;Body	1224	-0.0142411	0.00348528	4.67992e-05	1	--
cg24749672	12	51718108	BIN2	TSS200	1220	-0.00272028	0.000666387	4.75969e-05	1	--
cg09413529	12	115112225	TBX3;TBX3	Body;Body	1231	0.0363662	0.00892232	4.88508e-05	1	++
cg23621158	4	83206416			1221	-0.000767102	0.000188433	4.9905e-05	1	--
cg15739997	20	48729771	UBE2V1;UBE2V1;UBE2V1;TMEM189-UBE2V1;UBE2V1	TSS200;Body;Body;Body;Body	1227	-0.000669687	0.000164708	5.09663e-05	1	--
cg07266350	3	49460521	AMT;AMT;AMT;NICN1;AMT;AMT	TSS1500;TSS1500;TSS1500;3'UTR;TSS1500;TSS1500	1217	0.00633626	0.00156085	5.23935e-05	1	++
cg05025046	2	119013708			1231	-0.0282611	0.00697628	5.42596e-05	1	--
cg07441654	11	1330807	TOLLIP;LOC255512;TOLLIP	1stExon;TSS200;5'UTR	1225	-0.000308287	7.61394e-05	5.47455e-05	1	--
cg26035892	2	174855415			1229	0.0234218	0.00580322	5.78078e-05	1	++
cg01934142	4	39368026	RFC1	TSS200	1219	-0.000811042	0.00020112	5.86664e-05	1	--
cg21379321	3	40518745	ZNF619;ZNF619;ZNF619;ZNF619;ZNF619;ZNF619;ZNF619;ZNF619;ZNF619;ZNF619;ZNF619	1stExon;Body;1stExon;5'UTR;5'UTR;1stExon;1stExon;1stExon;5'UTR;5'UTR;5'UTR	1216	0.00270507	0.000671971	6.04359e-05	1	++
cg10764381	14	22005948	SALL2	TSS1500	1217	0.0115546	0.00287234	6.11649e-05	1	++
cg17185401	1	110052093	AMIGO1;AMIGO1	1stExon;5'UTR	1220	-0.00159496	0.00039682	6.20184e-05	1	--
cg14746738	6	149887876	C6orf72	Body	1226	-0.000799062	0.00019905	6.3306e-05	1	--
cg13241807	11	33757992	CD59;CD59;CD59;CD59;CD59;CD59;CD59;CD59	1stExon;5'UTR;1stExon;5'UTR;5'UTR;1stExon;5'UTR;1stExon	1223	-0.00124004	0.000309442	6.5208e-05	1	--
cg10681065	7	100239172	TFR2;TFR2	5'UTR;1stExon	1232	-0.0161152	0.00402659	6.65889e-05	1	--
cg26944245	16	421049	TMEM8A;MRPL28	3'UTR;TSS1500	1232	-0.0613256	0.0153282	6.6969e-05	1	--
cg21427956	20	30619244	C20orf160	3'UTR	1223	-0.0112515	0.00281332	6.74052e-05	1	--
cg20347626	2	25896320	DTNB;DTNB;DTNB;DTNB;DTNB;DTNB;DTNB;DTNB;DTNB;DTNB	1stExon;1stExon;1stExon;5'UTR;5'UTR;5'UTR;1stExon;5'UTR;1stExon;5'UTR	1225	-0.000700638	0.000175341	6.83976e-05	1	--
cg03848676	22	38528943	PLA2G6;PLA2G6	Body;Body	1165	0.00219177	0.000548423	6.84272e-05	1	++
cg09111071	4	38665154	FLJ13197;KLF3	Body;TSS1500	1223	-0.00128023	0.000320559	6.9012e-05	1	--
cg21662506	5	167956425	FBLL1	TSS200	1229	0.00462183	0.00115769	6.94023e-05	1	++
cg23665729	3	49977591	RBM6;RBM6;RBM6;RBM6	5'UTR;1stExon;1stExon;5'UTR	1229	-0.000904835	0.000226679	6.95788e-05	1	--
cg18558647	15	93198495	FAM174B	Body	1212	-0.00109252	0.00027404	7.10973e-05	1	--
cg02773192	3	8893478			1224	-0.00551941	0.00138499	7.15129e-05	1	--
cg11733769	18	77532565			1231	-0.0222122	0.00557842	7.2488e-05	1	--
cg12402132	12	121148554	UNC119B	Body	1227	-0.000787836	0.000197961	7.3124e-05	1	--
cg02060794	3	52273307	TWF2	TSS200	1223	-0.000579467	0.000145684	7.38109e-05	1	--
cg25625872	20	62258572	GMEB2	TSS200	1223	-0.000400874	0.000100797	7.39622e-05	1	--
cg23573822	10	1151180	WDR37	Body	1202	-0.0125494	0.00315567	7.41213e-05	1	--
cg22234855	19	44006148	PHLDB3	Body	1225	-0.0160639	0.00405614	7.92368e-05	1	--
cg22001533	2	50574516	NRXN1;NRXN1;NRXN1;NRXN1	Body;1stExon;5'UTR;Body	1224	0.00801807	0.00202728	8.10011e-05	1	++
cg07263322	2	222657752			1224	-0.0156023	0.00394659	8.15789e-05	1	--
cg10899904	8	74005557	C8orf84	TSS200	1198	-0.00130549	0.000330427	8.25076e-05	1	--
cg11168694	6	28478432	GPX6	Body	1216	0.00835181	0.00211571	8.35983e-05	1	++
cg09857273	8	95230984	CDH17	TSS1500	1222	-0.0157046	0.00398251	8.50053e-05	1	--
cg09009644	17	72209721	MGC16275;TTYH2;TTYH2	TSS1500;1stExon;5'UTR	1226	-0.000680188	0.000172501	8.50956e-05	1	--
cg19596435	1	11741483	MAD2L2;MAD2L2	TSS1500;5'UTR	1226	-0.0036159	0.00091766	8.60644e-05	1	--
cg01853367	14	105634387	JAG2;JAG2	Body;Body	1215	-0.000753906	0.000191439	8.69086e-05	1	--
cg14750948	3	147130477	ZIC1	Body	1204	0.0130367	0.00331059	8.70366e-05	1	++
cg04001726	12	112547043	NAA25	TSS1500	1216	-0.00219382	0.000558155	8.96645e-05	1	--
cg17089729	4	40043204			1222	-0.00607942	0.00154744	9.03039e-05	1	--
cg20465143	8	144653962	C8orf73	Body	1218	0.00138899	0.000353758	9.11773e-05	1	++
cg04587829	17	80692947	FN3K	TSS1500	1230	-0.0232286	0.00592357	9.3017e-05	1	--
cg10911971	3	40351164	EIF1B	TSS200	1218	-0.000581954	0.000148576	9.48027e-05	1	--
cg21656824	11	76494942	TSKU	5'UTR	1226	-0.00130196	0.000332855	9.68855e-05	1	--
cg04034767	12	52400907	GRASP	1stExon	1226	-0.00166186	0.000424897	9.69931e-05	1	--
cg20364241	4	87056153	MAPK10;MAPK10;MAPK10	Body;Body;Body	1230	0.0203018	0.00519734	9.89817e-05	1	++

## Sheet: S11
Table S11. Handedness, EWAS, ALSPAC adults, RH vs LH (adjusted model )
	CHR	Position	Gene	Gene.region	Weight	Estimate	SE	p.value	q.value	Direction
cg19915181	14	81905381			1058	-0.0254202	0.00506988	6.27655e-07	0.295918	--
cg00746864	17	65373877	PITPNC1;PITPNC1	TSS200;TSS200	1051	-0.00135905	0.00027254	7.21716e-07	0.340264	--
cg16852837	18	51750955	MBD2;MBD2;MBD2;MBD2	1stExon;1stExon;5'UTR;5'UTR	1051	-0.000713071	0.00014496	1.01286e-06	0.477529	--
cg03983811	10	99400441	PI4K2A	TSS200	1053	-0.000965895	0.000196795	1.06942e-06	0.504193	--
cg12113561	17	36860216			1055	-0.00109694	0.000225964	1.39481e-06	0.657604	--
cg12884381	3	33481853	UBP1;UBP1;UBP1;UBP1;UBP1;UBP1	1stExon;1stExon;5'UTR;5'UTR;1stExon;5'UTR	1053	-0.00124948	0.000268158	3.58801e-06	1	--
cg20418501	4	80644890			1056	-0.02079	0.00447414	3.81156e-06	1	--
cg00958781	5	140018929	TMCO6	TSS200	1025	-0.000862704	0.000186906	4.4297e-06	1	--
cg20947268	22	41682278	RANGAP1	TSS200	1054	-0.00243657	0.000530305	4.87441e-06	1	--
cg22541911	12	51785465	GALNT6	TSS1500	1043	-0.00103649	0.000225951	5.0538e-06	1	--
cg25433188	10	7453511	SFMBT2	TSS200	1052	-0.00334053	0.000744513	8.0477e-06	1	--
cg06421633	17	48797139	LUC7L3;LUC7L3	1stExon;1stExon	1051	-0.00123482	0.000275323	8.11813e-06	1	--
cg03907864	22	41865051	ACO2;PHF5A	TSS200;TSS1500	1053	-0.000852269	0.000190277	8.3395e-06	1	--
cg10202233	1	249168142			1052	-0.0020023	0.000449135	9.18188e-06	1	--
cg06699638	8	37963308	ASH2L;ASH2L	Body;TSS200	1051	-0.00138257	0.000311433	1.00025e-05	1	--
cg10943348	15	72668568	HEXA;C15orf34	TSS200;Body	1056	-0.00219609	0.00049624	1.06524e-05	1	--
cg12793681	2	240066324	HDAC4	Body	1043	-0.0235287	0.00532775	1.11213e-05	1	--
cg05025046	2	119013708			1057	-0.0348339	0.00789284	1.12531e-05	1	--
cg04246880	10	135150497	CALY	TSS200	1052	-0.000988554	0.000224448	1.1726e-05	1	--
cg17366378	15	45458906			1050	-0.000921732	0.00020962	1.21181e-05	1	--
cg16780771	16	81643766	CMIP;CMIP	Body;Body	1058	-0.0158154	0.00360553	1.27093e-05	1	--
cg03022732	13	42614748			1046	-0.00333634	0.000761987	1.31882e-05	1	--
cg02850812	13	46961666	C13orf18	TSS200	1047	-0.00157622	0.00036043	1.35056e-05	1	--
cg22223602	11	119077220	CBL	1stExon	1048	-0.000680926	0.000156149	1.42798e-05	1	--
cg20991483	7	1215631			1058	0.0187242	0.00430616	1.50888e-05	1	++
cg03939709	17	1064210	ABR;ABR	Body;5'UTR	1040	-0.0141083	0.00324818	1.54417e-05	1	--
cg08713568	1	91195504			1055	0.0275519	0.00634619	1.55554e-05	1	++
cg10764381	14	22005948	SALL2	TSS1500	1045	0.0136245	0.00314783	1.65209e-05	1	++
cg09857273	8	95230984	CDH17	TSS1500	1050	-0.0197062	0.0045624	1.71845e-05	1	--
cg15739997	20	48729771	UBE2V1;UBE2V1;UBE2V1;TMEM189-UBE2V1;UBE2V1	TSS200;Body;Body;Body;Body	1055	-0.000794375	0.000184614	1.84718e-05	1	--
cg07135478	17	1090677	ABR	TSS200	1055	-0.00157752	0.000366676	1.85275e-05	1	--
cg22001533	2	50574516	NRXN1;NRXN1;NRXN1;NRXN1	Body;1stExon;5'UTR;Body	1051	0.00976536	0.00227444	1.92617e-05	1	++
cg26084005	2	241760190	KIF1A	TSS1500	1046	-0.000774265	0.000180536	1.96856e-05	1	--
cg10698404	7	75988421	YWHAG	TSS200	1052	-0.000991433	0.000231269	1.98307e-05	1	--
cg01777187	21	40721343	HMGN1	TSS1500	1051	-0.000990383	0.000231148	2.00334e-05	1	--
cg03263168	2	158732716	ACVR1;ACVR1	TSS1500;TSS1500	1052	-0.00133151	0.000310991	2.03121e-05	1	--
cg25715328	19	9649297	ZNF426;ZNF426	5'UTR;1stExon	1052	-0.000755647	0.0001767	2.07688e-05	1	--
cg20536263	22	41418742			1052	-0.000534587	0.000125217	2.14347e-05	1	--
cg06054963	11	65657880	CCDC85B;CCDC85B	1stExon;5'UTR	1038	-0.0021908	0.000513219	2.15125e-05	1	--
cg06107469	12	56862350	SPRYD4;SPRYD4	1stExon;5'UTR	1053	-0.000911109	0.000213813	2.2206e-05	1	--
cg24004745	3	190231805	IL1RAP;IL1RAP;IL1RAP;IL1RAP;IL1RAP;IL1RAP	TSS200;TSS200;TSS200;TSS200;TSS200;TSS200	1055	-0.000932405	0.000218873	2.23204e-05	1	--
cg04587829	17	80692947	FN3K	TSS1500	1056	-0.0283365	0.00665543	2.25528e-05	1	--
cg19292712	7	123564194	SPAM1;SPAM1	TSS1500;TSS1500	1058	-0.0141296	0.00331998	2.27194e-05	1	--
cg06941156	14	89796856	FOXN3;FOXN3	Body;Body	1033	-0.00514669	0.00121051	2.31994e-05	1	--
cg08275602	12	29935873	TMTC1	5'UTR	1041	-0.00367999	0.000865876	2.33507e-05	1	--
cg05888872	10	14050479	FRMD4A	Body	1046	0.0167065	0.00393311	2.35834e-05	1	++
cg13183282	1	155948244	ARHGEF2;ARHGEF2;ARHGEF2;ARHGEF2;ARHGEF2	5'UTR;1stExon;TSS1500;1stExon;5'UTR	1054	-0.00108583	0.000255733	2.37448e-05	1	--
cg12821539	13	100642775			1046	0.0080813	0.00190449	2.40409e-05	1	++
cg12402132	12	121148554	UNC119B	Body	1054	-0.000953644	0.000224806	2.41521e-05	1	--
cg01934142	4	39368026	RFC1	TSS200	1048	-0.000961694	0.000226761	2.42773e-05	1	--
cg14326909	6	107235623			1052	0.0102507	0.00241749	2.43514e-05	1	++
cg10899904	8	74005557	C8orf84	TSS200	1029	-0.00153108	0.000361368	2.47584e-05	1	--
cg11257741	5	40438831			1056	-0.0336413	0.00794449	2.49567e-05	1	--
cg26857370	16	34442283			1057	-0.0349128	0.00827532	2.67179e-05	1	--
cg15935227	7	157934685	PTPRN2;PTPRN2;PTPRN2	Body;Body;Body	1031	-0.0488089	0.0115684	2.67485e-05	1	--
cg18731789	11	64009083	FKBP2;FKBP2;FKBP2	TSS1500;5'UTR;5'UTR	1054	-0.00119303	0.000283129	2.73319e-05	1	--
cg05225404	16	88689020	ZC3H18	Body	1037	-0.015917	0.0037787	2.75421e-05	1	--
cg17853087	1	144533354			1056	-0.0203868	0.00484711	2.82687e-05	1	--
cg12365107	3	52720035	GNL3;GNL3;GNL3;PBRM1;GNL3;GNL3;GNL3	1stExon;5'UTR;5'UTR;TSS200;1stExon;5'UTR;1stExon	1024	-0.000574653	0.000136805	2.90195e-05	1	--
cg01878788	6	33176342	RING1;RING1	1stExon;5'UTR	1033	-0.00100448	0.000239989	3.09501e-05	1	--
cg22456975	1	174969442	CACYBP;CACYBP	Body;5'UTR	1052	-0.00105011	0.000251069	3.12967e-05	1	--
cg13934606	12	57610705	NXPH4;NXPH4	5'UTR;1stExon	1052	-0.00141051	0.000337317	3.14342e-05	1	--
cg15932738	12	6875631	PTMS;PTMS	1stExon;5'UTR	1052	-0.0012298	0.000295252	3.37282e-05	1	--
cg17465133	8	12809420	C8orf79	5'UTR	1047	-0.0010412	0.000250113	3.40816e-05	1	--
cg10681065	7	100239172	TFR2;TFR2	5'UTR;1stExon	1058	-0.0186268	0.0044792	3.47052e-05	1	--
cg09124213	11	62432393	SNORA57;C11orf48;METTL12	TSS1500;Body;TSS1500	1045	-0.000872578	0.000210231	3.59459e-05	1	--
cg16860848	19	50269991	AP2A1;AP2A1	TSS200;TSS200	1052	-0.00104255	0.000251319	3.62794e-05	1	--
cg11733769	18	77532565			1057	-0.0260969	0.00629413	3.65896e-05	1	--
cg07309102	9	110251826	KLF4;KLF4	1stExon;5'UTR	1036	-0.000717164	0.000173008	3.68011e-05	1	--
cg04001726	12	112547043	NAA25	TSS1500	1044	-0.00260232	0.000627917	3.69187e-05	1	--
cg11990559	2	240727278			1049	-0.0226162	0.00546298	3.76175e-05	1	--
cg22790142	14	24769116	C14orf21;DHRS1;C14orf21;DHRS1	5'UTR;TSS1500;1stExon;TSS200	1054	-0.000601938	0.000145456	3.78659e-05	1	--
cg09433910	17	1626509	WDR81;WDR81;WDR81	TSS1500;Body;5'UTR	1038	0.00642814	0.00155345	3.79631e-05	1	++
cg06945667	16	19566991	C16orf62	TSS200	1054	-0.0019454	0.000470385	3.82752e-05	1	--
cg12527384	11	123525060	SCN3B;SCN3B;SCN3B;SCN3B	1stExon;5'UTR;1stExon;5'UTR	1050	-0.00105065	0.000254134	3.8541e-05	1	--
cg00584636	2	220253109	DNPEP	TSS1500	1045	-0.00346455	0.000838291	3.87804e-05	1	--
cg10633576	13	112823573			1056	-0.010199	0.00247191	3.99079e-05	1	--
cg12556436	6	83777615	DOPEY1	5'UTR	1052	-0.000725187	0.000175908	4.05095e-05	1	--
cg20347626	2	25896320	DTNB;DTNB;DTNB;DTNB;DTNB;DTNB;DTNB;DTNB;DTNB;DTNB	1stExon;1stExon;1stExon;5'UTR;5'UTR;5'UTR;1stExon;5'UTR;1stExon;5'UTR	1053	-0.000803009	0.00019486	4.07824e-05	1	--
cg21798447	4	85504053	CDS1	TSS200	1040	-0.0021764	0.000528454	4.12666e-05	1	--
cg17278249	12	76478805	NAP1L1;NAP1L1	TSS200;TSS200	1055	-0.00101911	0.000247479	4.12976e-05	1	--
cg09413529	12	115112225	TBX3;TBX3	Body;Body	1057	0.0419716	0.0102045	4.21706e-05	1	++
cg14576565	11	64059453	KCNK4	5'UTR	1051	-0.00075858	0.000184597	4.28494e-05	1	--
cg14474811	12	118500931			1057	0.0351104	0.00857627	4.57461e-05	1	++
cg13198297	17	18046564	MYO15A	Body	1057	-0.0297416	0.00726614	4.58883e-05	1	--
cg22693302	11	67188192	ATPGD1;ATPGD1	Body;Body	1053	-0.00105781	0.000258458	4.59807e-05	1	--
cg05279284	14	24769176	DHRS1;C14orf21;DHRS1	TSS1500;1stExon;TSS200	1037	-0.00058988	0.00014415	4.61633e-05	1	--
cg22336774	19	7600718	PNPLA6;PNPLA6;PNPLA6;PNPLA6;PNPLA6	Body;Body;Body;1stExon;Body	1049	-0.00070821	0.00017322	4.68341e-05	1	--
cg24635257	1	12226947	TNFRSF1B	TSS200	1050	-0.00112103	0.000274344	4.72875e-05	1	--
cg22092448	19	18530401	SSBP4;SSBP4;SSBP4;SSBP4	1stExon;5'UTR;1stExon;5'UTR	1049	-0.00066347	0.000162399	4.74497e-05	1	--
cg21211594	3	105587814	CBLB;CBLB	1stExon;5'UTR	1052	-0.00106278	0.000260255	4.78004e-05	1	--
cg18543164	2	22409266			1050	-0.00401921	0.000985558	4.89386e-05	1	--
cg23948874	11	10830481	EIF4G2;EIF4G2;EIF4G2;EIF4G2	5'UTR;1stExon;5'UTR;1stExon	1058	0.00321334	0.000788138	4.91135e-05	1	++
cg21871213	17	8383800	MYH10	Body	1038	0.000920807	0.00022601	4.98006e-05	1	++
cg27256934	11	61197489	CPSF7;CPSF7;CPSF7;SDHAF2	TSS200;TSS200;TSS200;TSS200	1054	-0.000840603	0.000206457	5.02969e-05	1	--
cg26284905	5	179128941	CANX;CANX	5'UTR;5'UTR	1058	-0.0124055	0.00304712	5.03576e-05	1	--
cg11384281	3	64009226	PSMD6	TSS200	1054	-0.000681907	0.00016754	5.06071e-05	1	--
cg26200001	6	56955042	ZNF451;ZNF451;ZNF451;ZNF451	5'UTR;1stExon;1stExon;5'UTR	1052	-0.000923177	0.0002271	5.17021e-05	1	--
cg16532176	3	156393537	TIPARP;LOC100287227	5'UTR;TSS200	1054	-0.00263509	0.000649035	5.28117e-05	1	--
cg17162132	11	62439285	C11orf83;C11orf48	1stExon;TSS200	1023	-0.000557372	0.000137329	5.32298e-05	1	--

## Sheet: S12
Table S12. EWAS follow-up of CpGs from significant DMRs
Analysis	CpG from DMR	Chr	Gene	Direction of effect*	EWAS atlas	EWAS catalogue
Meta-analysis	cg12862537	20	BLCAP; NNAT	--	myalgic encephalomyelitis/chronic fatigue syndrome	metabolic parameters, arm fat mass
	cg10981598	20	BLCAP; NNAT	--	myalgic encephalomyelitis/chronic fatigue syndrome; preterm birth; down syndrome	metabolic parameters,
	cg13790727	20	BLCAP; NNAT	--	not found	metabolic parameters,
	cg20783699	20	BLCAP; NNAT	--	not found	metabolic parameters,
	cg25712981	20	BLCAP; NNAT	--	myalgic encephalomyelitis/chronic fatigue syndrome; preterm birth	metabolic parameters,
	cg03615235	20	BLCAP; NNAT	--	myalgic encephalomyelitis/chronic fatigue syndrome; preterm birth	metabolic parameters,
	cg17643025	20	BLCAP; NNAT	--	myalgic encephalomyelitis/chronic fatigue syndrome	metabolic parameters,
	cg24762053	20	BLCAP; NNAT	--	myalgic encephalomyelitis/chronic fatigue syndrome	metabolic parameters,
	cg14469070	20	BLCAP; NNAT	--	myalgic encephalomyelitis/chronic fatigue syndrome; down syndrome	metabolic parameters,
	cg22298088	20	BLCAP; NNAT	++	myalgic encephalomyelitis/chronic fatigue syndrome	bone mineral density, metabolic parameters
	cg22943498	20	BLCAP; NNAT	--	myalgic encephalomyelitis/chronic fatigue syndrome; preterm birth	head circumference, metabolic parameters
	cg14765818	20	BLCAP; NNAT	--	not found	metabolic parameters,
	cg08402058	20	BLCAP; NNAT	--	not found	metabolic parameters,
	cg15473473	20	BLCAP; NNAT	--	myalgic encephalomyelitis/chronic fatigue syndrome	metabolic parameters,
	cg07156273	20	BLCAP; NNAT	--	down syndrome	metabolic parameters,
	cg01466133	20	BLCAP; NNAT	--	obesity	metabolic parameters,
	cg04210100	2	IAH1	--	not found	metabolic parameters; schizophrenia; bone mineral density
	cg01417553	2	IAH1	--	not found	metabolic parameters
	cg17568255	2	IAH1	--	not found	metabolic parameters
	cg20556744	2	IAH1	--	not found	bone mineral density, metabolic parameters
	cg05986044	2	IAH1	--	not found	metabolic parameters
	cg12285409	2	IAH1	--	not found	bone mineral density, metabolic parameters
	cg27494615	2	IAH1	--	not found	gestational age, bone mineral density, metabolic parameters
EWAS ALSPAC 7 years old	cg21737976	20	SDCBP2	++	not found	metabolic parameters
	cg21871261	20	SDCBP3	++	not found	metabolic parameters, arm fat mass
	cg14006741	20	SDCBP4	++	alcohol consumption	metabolic parameters, arm tissue mass
	cg12630018	20	SDCBP5	++	not found	bone mineral density
EWAS NTR 9 years old	cg10085209	9	IKBKAP; FAM206A	--	not found	not found
	cg13149234	9	IKBKAP; FAM206A	--	not found	not found
	cg14208721	9	IKBKAP; C9orf6	--	not found	not found
	cg07968629	9	IKBKAP; FAM206A	--	not found	not found
	cg00736037	9	IKBKAP; FAM206A	--	not found	not found
	cg05414225	9	C9orf6; IKBKAP	--	not found	bone mineral density, metabolic parameters
	cg14304916	9	C9orf6; IKBKAP	++	not found	metabolic parameters
	cg14290593	9	C9orf6; IKBKAP	--	not found	metabolic parameters
	cg14082422	9	C9orf6; IKBKAP	--	not found	smoking, bone mineral density, metabolic parameters
	cg11953824	9	C9orf6; IKBKAP	--	not found	metabolic parameters
	cg01353522	12	WNK1	--	not found	not found
	cg07525913	12	WNK1	--	not found	not found
	cg06793325	22	MB	--	ancestry	not found
	cg12628553	22	MB	--	not found	not found
	cg01753788	8	PLEC1	++	not found	gestational age, bone mineral density
	cg23934955	8	PLEC1	--	not found	gestational age, smoking status, arm bone mineral density
	cg15628518	8	PLEC1	--	myalgic encephalomyelitis/chronic fatigue syndrome; multiple sclerosis; systemic lupus erythematosus (SLE) ; Hyperdiploid B Acute Lymphoblastic Leukemia; prostate cancer	gestational age, sex, total bone mineral density, metabolic parameters
	cg19893585	8	PLEC1	--	smoking; breast cancer; Hyperdiploid B Acute Lymphoblastic Leukemia; prostate cancer; systemic lupus erythematosus (SLE)	gestational age, sex, metabolic parameters
*direction of effect in left-handers
