# Supplementary material for: Epigenome-wide association study of left-handedness for different tissues and ages
Source: Research Square preprint supplement (doi:10.21203/rs.3.rs-375556/v1), 2021-04-12
Supplement: Supplementary file 4 [file da6819f35f75b7bab35968ba.xlsx]

## Sheet: content
Table S1. Adult cohort characteristics
Table S2. Child cohort characteristics
Table S3. Year of birth and handedness in NTR adults
Table S4. Characteristics of discordant MZ twins

## Sheet: S1
Table S1. Adult cohort characteristics
		NTR adults						ALSPAC adults
	N	total	lefthanded	righthanded	p	N	total		lefthanded	righthanded	p
N		2682	324(12%)	2358(88%)			1232		99 (8%)	1133 (92%)
Age at blood sampling (years, mean (SD))	2682	36.5 (12.7)	34.3(11.2)	36.8(12.9)	0.001**	1232	48.98(5.55)		49.08 (5.92)	48.98 (5.51)	0.861
Sex	2682				0.208	1232
Males, n(%)		902 (34%)	119 (37%)	783 (33%)			364 (29.5%)		31 (31.3%)	333 (29.4%)
Females, n (%)		1780 (66%)	205 (63%)	1575(67%)			868 (70.5%)		68 (68.7%)	800 (70.7%)
BMI (mean(SD))	2667	24.2(3.9)	24.2(3.7)	24.2(3.9)	0.977	1095	26.6(4.7)		25.80 (4.25)	26.71 (4.74)	0.099
Smoking, current, n(%)	2677	551 (20.58%)	65(20.19%)	486(20.6%)	0.964	1232	461 (37.4%)		37 (37.4%)	424 (37.4%)	0.101
Cell percentage		Neutrophils						B lymphocytes
mean (SD)	2682	52.4(9.1)	52.77(8.7)	52.4(9.2)	0.485	1232	10.42(4.03)		10.76(4.3)	10.39 (4)	0.38
		Eosinophils						CD4T
	2682	3.09(2.23)	3.1(1.89)	3.09(2.27)	0.945	1232	18.07(6.69)		18.41(7.23)	18.04(6.64)	0.601
		Monocytes						CD8T
	2682	8.4(2.3)	8.4(2.16)	8.42(2.4)	0.922	1232	1.87(3.18)		2.16(3.77)	1.85(3.13)	0.351
Twin-specific characteristics								Natural killer cells
Singletons (n(%))		196(7.3%)	9(2.7%)	187(8%)		1232	20.79(5.81)		21.95(6.51)	20.69(5.73)	0.038
Multiples - twins and triplets (n(%))		2486(92.7%)	315(97.2%)	2171(92%)				Granulocytes
Zygosity	2484				0.489	1232	47.72(12.61)		45.54(14.72)	47.91(12.4)	0.073
MZ n(%)		1542(62%)	190(60.3%)	1352(62.3%)				Monocytes
DZ (n(%)		942(37.92%)	125(39.7%)	817(37.7%)		1232	7.43(3.49)		7.5(3.36)	7.43(3.5)	0.855
Handedness discordance
Discordant MZ n(%)		266(20.8%)	133(81.1%)	133(11.9%)
Concordant left-handed n(%)		31(2.4%)	31(18.9%)	-
Concordant right-handed n(%)		982(76.7%)	-	982(88%)
**<0.05
In total lefthanded and righthanded percentage is by row, in others percentage is by column

## Sheet: S2 
Table S2. Child cohort characteristics
		NTR children (buccal cells)					ALSPAC at birth (cord blood)					ALSPAC 7 years old (blood)					ALSPAC 17 years old (blood)				ALSPAC 24 years old (blood)
	N	total	lefthanded	righthanded	p*	N	total	lefthanded	righthanded	p	N	total	lefthanded	righthanded	p	N	total	lefthanded	righthanded	p	N	total	lefthanded	righthanded	p
N		946	139 (15%)	807 (85%)			703	60 (8.5%)	643 (91.5%)			757	68 (9%)	689 (91%)			759	69 (9.1%)	690 (90.9%)			442	37 (8.4%)	405 (91.6%)
Age at blood sampling (mean (SD))	946	9.57 (1.85)	9.58(1.78)	9.56(1.86)	0.943						757	7.44 (0.13)	7.43 (0.08)	7.44 (0.13)	0.585	759	17.11 (1.04)	16.91 (1.13)	17.13 (1.03)	0.082	442	24.33 (0.74)	24.3 (0.67)	24.33 (0.74)	0.76
Sex	946					703					757
Males, n(%)		483 (51%)	71 (51%)	412 (51%)	0.999		334 (47.5%)	32 (53.3%)	302 (47%)	0.348		368 (48.6%)	36 (52.9%)	332 (48.2%)	0.525	759	357 (47%)	36 (52.2%)	321 (46.5%)	0.379	442	189 (57.2%)	16 (43.2%)	173 (42.7%)	1
Females, n(%)		463 (49%)	68 (49%)	395 (49%)			369 (52.5%)	28 (46.7%)	341 (53%)			389 (51.4%)	32 (47.1%)	357 (51.8%)			402 (53%)	33 (47.8%)	369 (53.5%)			253 (57.2%)	21 (56.8%)	232 (57.3%)
Gestational age (mean (SD))	918	35.88(2.57)	35.51(2.83)	35.93(2.52)	0.298	703	39.6(1.53)	39.63 (1.37)	39.57 (1.55)	0.763	756	39.6 (1.53)	39.6 (1.37)	39.6 (1.55)	0.783
Birth weight (children), BMI (>=16 years old) (mean (SD))	914	2401 (541.2)	2369 (585.2)	2407 (533.5)	0.407	694	3485 (489.2)	3567.8 (434.4)	3477.3 (493.6)	0.174	747	3490.4 (489.8)	3582.9 (445.4)	3481.3 (493.3)	0.105	650	22.47 (3.64)	21.87 (3.76)	22.53 (3.63)	0.191	439	24.35 (4.46)	24.22 (3.55)	24.36 (4.54)	0.847
Maternal smoking during pregnancy, n(%)	874				0.189	697				0.401	752						B lymphocytes					B lymphocytes
Non-smoking		804(92%)	114(89%)	690(93%)			614 (88.1%)	50 (84.8%)	564 (88.4%)			661 (87.9%)	57 (85.1%)	604 (88.2%)		759	0.11(0.03)	0.11 (0.03)	0.11 (0.03)	0.477	442	0.11 (0.02)	0.12 (0.02)	0.11 (0.02)	0.398
Smoking		70(8%)	14(11%)	56(7%)			83 (11.9%)	9 (15.2%)	74 (11.6%)			91 (12.1%)	10 (14.9%)	81 (11.8%)	0.435		CD4T					CD4T
Cell proportions		Epithelium cells					B lymphocytes					B lymphocytes				759	0.18 (0.05)	0.18 (0.05)	0.18 (0.05)	0.558	442	0.18(0.06)	0.19 (0.05)	0.18 (0.06)	0.436
(mean (SD))	946	0.81(0.112)	0.78(0.14)	0.82(0.1)	0.001**	703	0.17 (0.04)	0.18 (0.05)	0.17 (0.04)	0.488	757	0.14(0.03)	0.14 (0.03)	0.14 (0.03)	0.24		CD8T					CD8T
		Natural killer cells					CD4T					CD4T				759	0.03(0.04)	0.03 (0.03)	0.03 (0.04)	0.503	442	0.02 (0.03)	0.02 (0.03)	0.02 (0.03)	0.249
	946	0.03(0.012)	0.032(0.013)	0.029(0.012)	0.013**	703	0.18 (0.06)	0.19 (0.06)	0.18 (0.06)	0.553	757	0.21(0.05)	0.21(0.05)	0.21 (0.05)	0.81		Natural killer cells					Natural killer cells
							CD8T					CD8T				759	0.21(0.06)	0.22 (0.06)	0.21 (0.06)	0.428	442	0.21(0.05)	0.22 (0.05)	0.21 (0.05)	0.897
Twin-specific characteristics						703	0.1 (0.05)	0.10 (0.04)	0.10 (0.05)	0.629	757	0.04(0.04)	0.03 (0.04)	0.04 (0.04)	0.231		Granulocytes					Granulocytes
Zygosity	946				0.298		Natural killer cells					Natural killer cells				759	0.47(0.09)	0.47 (0.08)	0.47 (0.09)	0.82	442	0.49(0.09)	0.47 (0.09)	0.49 (0.09)	0.351
MZ n(%)		794 (82%)	121 (87%)	673 (84%)		703	0.01(0.02)	0.01 (0.01)	0.01 (0.02)	0.18	757	0.19(0.05)	0.20 (0.04)	0.19 (0.05)	0.135		Monocytes					Monocytes
DZ n(%)		152 (18%)	18 (13%)	134 (16%)			Granulocytes					Granulocytes				759	0.06 (0.03)	0.06 (0.03)	0.06 (0.03)	0.109	442	0.05 (0.03)	0.05 (0.03)	0.05 (0.03)	0.717
Handedness discordance	946					703	0.35 (0.1)	0.34 (0.10)	0.35 (0.10)	0.51	757	0.44(0.08)	0.44 (0.07)	0.44 (0.08)	0.968
Discordant MZ n(%)		172 (24%)	86 (83%)	86 (14%)			Monocytes					Monocytes
Concordant left-handed n(%)		18 (3%)	18 (17%)	-		703	0.01 (0.02)	0.01 (0.01)	0.01 (0.02)	0.18	757	0.06(0.03)	0.06 (0.03)	0.06 (0.03)	0.179
Concordant right-handed n(%)		520 (73%)	-	520 (85%)			nRBC
						703	0.19 (0.09)	0.18 (0.09)	0.19 (0.09)	0.5
*p-values from GEE (corrected for relatedness) ** <0.05
nRBC=nucleated red blood cells
In total lefthanded and righthanded percentage is by row, in others percentage is by column

## Sheet: S3
Table S3. Year of birth and handedness in NTR adults
		<=1939	1940-49	1950-59	1960-69	1970-79	1980-89	1990+	total
Left-handed	Count	4	12	35	35	181	61	10	338
	%	0.042	0.059	0.111	0.102	0.134	0.134	0.137	0.119
Right-handed	Count	79	186	267	298	1147	390	63	2430
	%	0.823	0.907	0.845	0.869	0.846	0.857	0.863	0.855
Ambidextrous	Count	13	7	14	10	27	4	0	75
	%	0.135	0.034	0.044	0.029	0.02	0.009	0	0.026
	Count	96	205	316	343	1355	455	73	2843

## Sheet: S4
Table S4. Characteristics of discordant MZ twins
	lefthanded	righthanded	p (comparison of LH vs RH discordant twins)
Children (N)	86	86
Age at blood sampling (mean (SD))	9.8(1.81)	9.8(1.81)
Sex in each group
Males n(%)	45(52%)
Females n(%)	41(48%)
Gestational age (mean (SD))	35(3.15)
Maternal smoking during pregnancy n(%)	14(9%)
Birth weight (mean (SD))	2246.6(582.2)	2273.73(600.1)	0.762
Epithelium cells proportion in buccal swabs (mean (SD))	0.78(0.14)	0.79(0.118)	0.578
Natural killer cells proportion in buccal swabs (mean (SD))	0.031(0.012)	0.031(0.012)	0.666
Adults (N)	133	133
Age at blood sampling (mean (SD))	32.8(9.7)	32.7(9.7)
Sex in each group
Males n(%)	39 (29%)
Females n(%)	94 (71%)
BMI (mean(SD))	24.2(4.2)	24.3(3.9)	0.35
Smoking, current n(%)	25(19%)	21(16%)	0.646
Neutrophils percentage (mean (SD))	52.73(8.97)	53.54(9.75)	0.975
Eosinophils precentage (mean (SD))	2.89(1.72)	2.81(2.01)	0.889
Monocytes percentage (mean (SD))	8.56(2.09)	8.38(2.24)	0.906
