# Supplementary material for: Epigenome-wide association study of left-handedness for different tissues and ages
Source: Research Square preprint supplement (doi:10.21203/rs.3.rs-375556/v1), 2021-04-12
Supplement: Supplementary file 5 [file 76df4a1385206af2a0ca5533.xlsx]

## Sheet: S30
Table S30. Polygenic and methylation scores prediction of handedness
	N	Model	score	beta	SE	p-value	R2	R2 (%)
NTR EWAS cohorts
NTR adults	2198	handedness ~ pgs + GWAS covariates	PGS	0.0541	0.0636	0.3946	0.0009	0.09
		handedness ~ MS1 + PGS + GWAS covariates + EWAS covariates	PGS	0.0471	0.0653	0.4708	0.0006	0.06
	2198	handedness ~ MS1 + PGS + GWAS covariates + EWAS covariates	MS p<10-1	0.0155	0.0826	0.8509	0	0
		handedness ~ MS2 + PGS + GWAS covariates + EWAS covariates	PGS	0.04596	0.06529	0.4815	0.0006	0.06
	2198	handedness ~ MS2 + PGS + GWAS covariates + EWAS covariates	MS p<10-3	-0.0494	0.0743	0.5063	0.0006	0.06
		handedness ~ MS3 + PGS + GWAS covariates + EWAS covariates	PGS	0.04596	0.06529	0.4815	0.0006	0.06
	2198	handedness ~ MS3 + PGS + GWAS covariates + EWAS covariates	MS p<10-5	-0.0953	0.0866	0.2709	0.0016	0.16
NTR at 9 years old	799	handedness ~ pgs + GWAS covariates	PGS	0.0161	0.1035	0.8765	0	0
		handedness ~ MS1 + PGS + GWAS covariates + EWAS covariates	PGS	0.041	0.1279	0.7484	0.0002	0.02
	800	handedness ~ MS1 + PGS + GWAS covariates + EWAS covariates	MS p<10-1	-0.0107	0.1079	0.921	0.0001	0.01
		handedness ~ MS2 + PGS + GWAS covariates + EWAS covariates	PGS	0.1223	0.1065	0.2505	0.0048	0.48
	800	handedness ~ MS2 + PGS + GWAS covariates + EWAS covariates	MS p<10-3	-0.0176	0.1081	0.8704	0.0002	0.02
		handedness ~ MS3 + PGS + GWAS covariates + EWAS covariates	PGS	0.1151	0.1024	0.2609	0.0027	0.27
	800	handedness ~ MS3 + PGS + GWAS covariates + EWAS covariates	MS p<10-5	-0.0098	0.1079	0.9276	0.0001	0.01
ALSPAC EWAS cohorts
ALSPAC mothers	574	handedness ~ pgs + GWAS covariates	PGS	-0.178	0.162	0.272	0.00461	0.461
		handedness ~ MS1 + PGS + GWAS covariates + EWAS covariates	PGS	-0.248	0.188	0.187	0.00372	0.372
		handedness ~ MS1 + PGS + GWAS covariates + EWAS covariates	MS p<10-1	0.00136	0.582	0.998	-1.26e-05	-0.00126
		handedness ~ MS2 + PGS + GWAS covariates + EWAS covariates	PGS	-0.254	0.188	0.177	0.00399	0.399
		handedness ~ MS2 + PGS + GWAS covariates + EWAS covariates	MS p<10-3	-0.369	0.539	0.493	0.00383	0.383
		handedness ~ MS3 + PGS + GWAS covariates + EWAS covariates	PGS	-0.234	0.189	0.216	0.00122	0.122
		handedness ~ MS3 + PGS + GWAS covariates + EWAS covariates	MS p<10-5	-0.183	0.228	0.423	-0.0017	-0.17
ALSPAC at 7 years	630	handedness ~ pgs + GWAS covariates	PGS	0.0364951	0.144762	0.800961	0.000314588	0.0314588
		handedness ~ MS1 + PGS + GWAS covariates + EWAS covariates	PGS	0.116078	0.157085	0.459936	0.00348317	0.348317
		handedness ~ MS1 + PGS + GWAS covariates + EWAS covariates	MS p<10-1	0.0296097	1.0699	0.977921	4.06339e-06	0.000406339
		handedness ~ MS2 + PGS + GWAS covariates + EWAS covariates	PGS	0.117156	0.15682	0.45502	0.00355959	0.355959
		handedness ~ MS2 + PGS + GWAS covariates + EWAS covariates	MS p<10-3	0.14145	0.884429	0.872933	0.00015426	0.015426
		handedness ~ MS3 + PGS + GWAS covariates + EWAS covariates	PGS	0.121647	0.156866	0.438054	0.00413572	0.413572
		handedness ~ MS3 + PGS + GWAS covariates + EWAS covariates	MS p<10-5	0.676721	0.415105	0.103051	0.0128181	1.28181
