# Supplementary material for: Epigenome-wide association study of left-handedness for different tissues and ages
Source: Research Square preprint supplement (doi:10.21203/rs.3.rs-375556/v1), 2021-04-12
Supplement: Supplementary file 6 [file bb8a9dfdb10a11c623f61c31.xlsx]

## Sheet: content
sheet	Title
S14	MZ discordant within-pair EWAS, adults, basic model
S15	MZ discordant within-pair EWAS, adults, adjusted model
S16	MZ discordant within-pair EWAS, children, basic model
S17	MZ discordant within-pair EWAS, children, adjusted model
S18	Handedness, EWAS, ALSPAC at birth, basic model
S19	Handedness, EWAS, ALSPAC at birth, adjusted model
S20	Handedness, EWAS, ALSPAC 7 years, basic model
S21	Handedness, EWAS, ALSPAC 7 years, adjusted model
S22	Handedness, EWAS, ALSPAC 17 years, basic model
S23	Handedness, EWAS, ALSPAC 17 years, adjusted model
S24	Handedness, EWAS, ALSPAC 24 years, basic model
S25	Handedness, EWAS, ALSPAC 24 years, adjusted model
S26	Handedness, EWAS, NTR children, basic model
S27	Handedness, EWAS, NTR children, adjusted model
		change direction of effect

## Sheet: S14  
Table S14. MZ discordant within-pair EWAS in adults, RH vs LH (basic)
	CHR	Position	Gene	Gene region	Weight	Estimate	t	CI low	CI high	p-value	q-value	Direction
cg17232991	4	8372840	ACOX3;ACOX3	Body;Body	133	-0.00434742	-4.80038	-0.00613886	-0.00255597	4.22452e-06	0.999995	--
cg03608583	2	232761931			133	0.0139456	4.63968	0.00799995	0.0198912	8.30184e-06	0.999995	++
cg23586792	2	200423026			133	0.00750412	4.49811	0.00420409	0.0108041	1.4869e-05	0.999995	++
cg19006130	11	118478252	PHLDB1;PHLDB1;PHLDB1	TSS200;5'UTR;TSS200	133	0.00913101	4.41568	0.00504058	0.0132214	2.07635e-05	0.999995	++
cg20458981	13	41885231	NAA16;NAA16;NAA16	TSS200;TSS200;TSS200	133	0.00576252	4.33559	0.00313339	0.00839165	2.86082e-05	0.999995	++
cg09441069	21	47569479	FTCD;FTCD	Body;Body	133	-0.00510105	-4.31424	-0.00743991	-0.00276219	3.11403e-05	0.999995	--
cg05914537	20	4764253	RASSF2;RASSF2	3'UTR;3'UTR	133	0.00662628	4.30276	0.00357999	0.00967256	3.25887e-05	0.999995	++
cg10536067	17	72890001	FADS6	TSS1500	133	0.00467322	4.30275	0.0025248	0.00682163	3.25898e-05	0.999995	++
cg06191165	1	82591536			133	0.00639931	4.2981	0.00345418	0.00934444	3.31945e-05	0.999995	++
cg24383528	10	127541906	BCCIP;DHX32	3'UTR;Body	133	0.00956966	4.247	0.00511246	0.0140269	4.05951e-05	0.999995	++
cg06598634	4	63416083			133	0.00643494	4.1991	0.00340359	0.0094663	4.89536e-05	0.999995	++
cg14817542	10	102295790	HIF1AN	1stExon	133	0.00312257	4.17797	0.00164416	0.00460098	5.31426e-05	0.999995	++
cg16688434	13	110768551			133	0.00859809	4.17527	0.00452461	0.0126716	5.37016e-05	0.999995	++
cg08931196	11	119205177	RNF26	TSS200	133	0.00388396	4.16152	0.00203779	0.00573012	5.66396e-05	0.999995	++
cg18476530	11	67141747	LOC100130987;CLCF1;CLCF1	Body;TSS1500;TSS200	133	0.0033209	4.15285	0.00173908	0.00490273	5.8571e-05	0.999995	++
cg14330078	3	187930521	LPP;LPP	TSS200;5'UTR	133	0.0036522	4.11034	0.00189458	0.00540982	6.89865e-05	0.999995	++
cg12937151	15	87758226			133	0.0198468	4.09043	0.0102491	0.0294445	7.4454e-05	0.999995	++
cg21335266	12	26278677	BHLHE41	TSS1500	133	-0.00250001	-4.07096	-0.00371477	-0.00128524	8.02009e-05	0.999995	--
cg00839132	18	74692235	MBP;MBP;MBP;MBP;MBP	3'UTR;3'UTR;3'UTR;3'UTR;3'UTR	133	0.00524562	4.06443	0.00269265	0.00779858	8.22212e-05	0.999995	++
cg02361493	12	131164500			132	-0.0041393	-4.06462	-0.00615388	-0.00212471	8.24748e-05	0.999995	--
cg26151467	13	112724221	SOX1;SOX1	1stExon;3'UTR	133	0.0114588	4.06058	0.00587667	0.0170409	8.34351e-05	0.999995	++
cg11309842	10	131341115	MGMT	Body	133	0.00528807	4.06013	0.00271172	0.00786443	8.35785e-05	0.999995	++
cg15780465	11	617476	IRF7;MUPCDH;IRF7;MUPCDH	TSS1500;Body;TSS1500;Body	132	0.00527104	4.03501	0.00268681	0.00785526	9.22837e-05	0.999995	++
cg03071143	19	11909233	ZNF491	TSS200	133	0.0054219	4.03022	0.00276074	0.00808305	9.3626e-05	0.999995	++
cg00580689	1	109585095	WDR47;WDR47;WDR47	TSS1500;TSS1500;TSS1500	133	0.00499105	4.02951	0.00254093	0.00744117	9.38781e-05	0.999995	++
cg20811730	1	150293902	PRPF3	TSS200	133	0.0100435	4.02638	0.00510929	0.0149777	9.49963e-05	0.999995	++
cg01453349	22	45705512	FAM118A;FAM118A;FAM118A	5'UTR;1stExon;TSS1500	133	-0.0163588	-4.02565	-0.0243971	-0.00832053	9.52595e-05	0.999995	--
cg10167849	6	34206152	HMGA1;HMGA1;HMGA1;HMGA1;HMGA1;HMGA1	5'UTR;5'UTR;5'UTR;5'UTR;5'UTR;TSS1500	131	0.00284659	4.02739	0.00144826	0.00424493	9.53345e-05	0.999995	++
cg26019112	11	31821313	PAX6;PAX6;PAX6	Body;Body;Body	133	0.00813956	4.02508	0.00413943	0.0121397	9.54656e-05	0.999995	++
cg15039603	21	46308308	ITGB2;ITGB2	Body;Body	133	-0.00360299	-4.02476	-0.0053738	-0.00183219	9.55809e-05	0.999995	--
cg23500835	11	8849195	ST5	5'UTR	133	-0.00726855	-4.00897	-0.010855	-0.00368211	0.000101457	0.999995	--
cg19191357	22	42196520	CCDC134	TSS200	133	0.00498516	4.00231	0.0025213	0.00744902	0.000104034	0.999995	++
cg23794200	6	102617822			133	-0.00811158	-4.00037	-0.0121226	-0.00410058	0.000104797	0.999995	--
cg21652107	4	48782392	FRYL	TSS200	132	0.00531003	3.98766	0.00267577	0.00794428	0.000110322	0.999995	++
cg00032912	15	96887529			133	0.00886752	3.97368	0.00445327	0.0132818	0.000115854	0.999995	++
cg18205465	7	45026543	C7orf40;SNORA9	TSS1500;TSS1500	132	0.00468313	3.97363	0.00235168	0.00701459	0.00011628	0.999995	++
cg22076676	2	43503935	THADA;THADA	Body;Body	133	0.00730752	3.97248	0.00366874	0.0109463	0.000116376	0.999995	++
cg25050951	15	30115147	TJP1;TJP1	TSS1500;TSS1500	133	0.00698661	3.96259	0.00349894	0.0104743	0.000120766	0.999995	++
cg03405789	8	67088895	CRH	3'UTR	133	0.0181046	3.95457	0.00904856	0.0271606	0.000124446	0.999995	++
cg02624129	11	130786230	SNX19;SNX19	1stExon;5'UTR	132	0.00650336	3.92876	0.00322875	0.00977798	0.000137474	0.999995	++
cg25540032	2	98885650	VWA3B	Body	133	0.0170582	3.9244	0.00846001	0.0256564	0.000139253	0.999995	++
cg25023298	10	77156697			133	0.0067048	3.92273	0.0033238	0.0100858	0.000140123	0.999995	++
cg19919303	11	129245922	BARX2;BARX2	1stExon;5'UTR	133	0.00406898	3.92176	0.00201662	0.00612134	0.00014063	0.999995	++
cg24875440	1	27986375			133	0.00570347	3.92044	0.00282573	0.00858121	0.000141317	0.999995	++
cg12417362	1	201617355	NAV1	TSS200	133	0.00887545	3.91825	0.00439475	0.0133562	0.000142474	0.999995	++
cg04801779	11	76998857	GDPD4	TSS1500	131	0.0148955	3.90863	0.00735607	0.022435	0.000148632	0.999995	++
cg01033175	3	101396021	ZBTB11;LOC100009676	TSS200;Body	133	0.00381396	3.89371	0.00187637	0.00575154	0.000156036	0.999995	++
cg07318428	10	11653985	USP6NL	TSS1500	132	-0.00295295	-3.89009	-0.00445463	-0.00145128	0.000158648	0.999995	--
cg12198841	5	115941397			133	0.00523879	3.8824	0.00256961	0.00790798	0.00016269	0.999995	++
cg19571071	16	27561715	GTF3C1;KIAA0556	TSS1500;Body	132	-0.00658691	-3.86555	-0.00995784	-0.00321599	0.000173659	0.999995	--
cg04432594	16	34408014			133	-0.00547444	-3.85206	-0.00828567	-0.00266322	0.000181908	0.999995	--
cg13384867	19	39663807	PAK4;PAK4;PAK4;PAK4;PAK4	Body;Body;Body;Body;Body	130	0.0022603	3.85333	0.00109973	0.00342087	0.000182798	0.999995	++
cg26300597	3	128840676	RAB43	TSS200	133	0.0144558	3.84837	0.00702539	0.0218862	0.000184383	0.999995	++
cg23872082	19	42817715	TMEM145	Body	133	0.00309556	3.84429	0.00150273	0.0046884	0.000187162	0.999995	++
cg18139806	3	64354189			133	0.00824716	3.84341	0.00400258	0.0124918	0.000187765	0.999995	++
cg21333665	17	73840659	UNC13D;UNC13D	5'UTR;1stExon	133	0.00424609	3.84223	0.00206007	0.00643211	0.00018858	0.999995	++
cg17472120	6	28058715	ZSCAN12L1	TSS1500	129	-0.0139202	-3.84392	-0.0210857	-0.00675474	0.000189815	0.999995	--
cg21023126	22	32870150	FBXO7;FBXO7	TSS1500;TSS1500	133	0.0131629	3.83274	0.00636945	0.0199563	0.000195243	0.999995	++
cg01640958	7	51698664			133	0.00479687	3.82379	0.00231538	0.00727836	0.000201737	0.999995	++
cg13446802	18	52576880	CCDC68;CCDC68	Body;Body	133	-0.00520409	-3.81697	-0.00790105	-0.00250713	0.000206819	0.999995	--
cg15920762	18	12657056	SPIRE1;SPIRE1;SPIRE1	TSS1500;Body;Body	132	0.00818292	3.81643	0.00394131	0.0124245	0.000207859	0.999995	++
cg18069290	12	58013539	SLC26A10	TSS200	133	-0.00314502	-3.81025	-0.00477776	-0.00151228	0.000211943	0.999995	--
cg22548015	20	30539544	PDRG1	Body	132	-0.0029636	-3.79761	-0.00450738	-0.00141981	0.000222578	0.999995	--
cg06336824	6	41755399	TOMM6;TOMM6	1stExon;5'UTR	133	-0.00315221	-3.79668	-0.00479453	-0.00150989	0.000222665	0.999995	--
cg10709246	19	17488116	PLVAP;PLVAP	5'UTR;1stExon	133	0.0089841	3.79155	0.00429698	0.0136712	0.000226859	0.999995	++
cg19267325	12	45270229	NELL2;NELL2;NELL2;NELL2;NELL2;NELL2;NELL2	Body;5'UTR;Body;1stExon;TSS1500;1stExon;5'UTR	133	0.00241896	3.78984	0.00115639	0.00368153	0.00022827	0.999995	++
cg09605254	8	124780730	FAM91A1	TSS200	133	0.00908844	3.78899	0.00434369	0.0138332	0.000228973	0.999995	++
cg15843818	2	165477582	GRB14	Body	132	0.00484351	3.78789	0.00231397	0.00737306	0.000230571	0.999995	++
cg06400065	11	111800554			133	0.0150837	3.78267	0.00719589	0.0229716	0.000234278	0.999995	++
cg22403811	8	85096015	RALYL;RALYL;RALYL;RALYL;RALYL	5'UTR;TSS1500;5'UTR;5'UTR;1stExon	133	0.0151034	3.77878	0.00719715	0.0230097	0.000237604	0.999995	++
cg09828625	20	23331259	NXT1	TSS200	133	-0.00362418	-3.7748	-0.00552334	-0.00172501	0.000241048	0.999995	--
cg14039020	8	99989605			132	-0.0145959	-3.77472	-0.0222453	-0.00694655	0.000241828	0.999995	--
cg26724186	19	3676340	PIP5K1C	Body	133	-0.00418211	-3.76929	-0.00637686	-0.00198737	0.000245903	0.999995	--
cg25196088	1	7703835	CAMTA1	Body	133	-0.00559798	-3.7678	-0.00853692	-0.00265904	0.000247226	0.999995	--
cg23405575	3	11034281	SLC6A1	TSS200	133	0.00705825	3.76243	0.00334738	0.0107691	0.000252067	0.999995	++
cg01081083	22	25202766	SGSM1;SGSM1;SGSM1;SGSM1	Body;Body;Body;Body	133	0.00873326	3.76121	0.00414026	0.0133263	0.000253183	0.999995	++
cg26744402	11	28588618			133	0.0197568	3.75988	0.00936261	0.030151	0.000254404	0.999995	++
cg26577658	16	84423876	ATP2C2	Body	131	-0.00332903	-3.75803	-0.00508156	-0.00157649	0.000257593	0.999995	--
cg21399079	2	105858139	GPR45	TSS200	133	0.00473067	3.75294	0.00223723	0.0072241	0.000260845	0.999995	++
cg00770693	12	132932098			133	-0.00539711	-3.75236	-0.00824226	-0.00255196	0.000261396	0.999995	--
cg07154904	12	133143645	FBRSL1	Body	132	-0.00384473	-3.75126	-0.00587226	-0.0018172	0.000263183	0.999995	--
cg26226202	17	44928552	WNT9B	TSS1500	133	0.0038646	3.74612	0.00182394	0.00590527	0.000267336	0.999995	++
cg22216491	4	110624749	CASP6;CASP6	TSS200;TSS200	133	0.00280995	3.73878	0.00132327	0.00429663	0.000274487	0.999995	++
cg08229018	4	119274133	PRSS12	TSS1500	131	0.0076721	3.73699	0.00361046	0.0117337	0.000277827	0.999995	++
cg14505299	7	51344674	COBL	Body	133	0.00569459	3.72964	0.00267434	0.00871484	0.000283638	0.999995	++
cg23049429	13	113345944	ATP11A;ATP11A	Body;Body	133	0.00881103	3.72616	0.00413354	0.0134885	0.000287204	0.999995	++
cg15234312	19	54372324	MYADM;MYADM;MYADM;MYADM;MYADM	TSS1500;5'UTR;5'UTR;5'UTR;TSS1500	133	0.00382127	3.72351	0.00179124	0.0058513	0.000289946	0.999995	++
cg19640500	14	55982148			133	0.00502462	3.72049	0.00235315	0.00769609	0.000293095	0.999995	++
cg13286620	3	14715425	C3orf20	TSS1500	133	0.0168184	3.72023	0.00787584	0.025761	0.000293371	0.999995	++
cg25091367	4	7289507	SORCS2	Body	133	0.0104218	3.71805	0.00487712	0.0159664	0.000295673	0.999995	++
cg01908551	17	81036175	METRNL	TSS1500	133	-0.00801237	-3.71641	-0.012277	-0.0037477	0.000297415	0.999995	--
cg17716930	19	51017331	ASPDH;ASPDH	TSS200;Body	133	-0.0119174	-3.71465	-0.0182635	-0.00557121	0.000299294	0.999995	--
cg16628119	14	93582398	ITPK1;ITPK1;ITPK1	TSS200;TSS200;TSS200	133	-0.00397559	-3.71204	-0.00609412	-0.00185705	0.000302096	0.999995	--
cg18108262	15	40857029	C15orf57;C15orf57;C15orf57;C15orf57;C15orf57	1stExon;5'UTR;1stExon;5'UTR;5'UTR	133	0.0040845	3.71105	0.00190734	0.00626166	0.000303175	0.999995	++
cg02084046	5	139027359	CXXC5	TSS1500	133	0.00552203	3.70898	0.00257698	0.00846707	0.00030542	0.999995	++
cg12079740	1	240473071	FMN2	Body	133	0.00630708	3.70321	0.0029381	0.00967606	0.000311785	0.999995	++
cg21245618	9	136847709	VAV2;VAV2	Body;Body	132	-0.0059009	-3.70383	-0.0090526	-0.00274919	0.000311947	0.999995	--
cg07063351	19	41060190	SPTBN4;SPTBN4	Body;Body	133	0.00483051	3.69446	0.00224414	0.00741688	0.00032167	0.999995	++
cg14675404	19	3292224	BRUNOL5	Body	132	0.016542	3.67973	0.00764895	0.025435	0.000339882	0.999995	++
cg24714106	15	37179779	LOC145845	TSS1500	133	0.00885498	3.67747	0.00409191	0.013618	0.000341713	0.999995	++

## Sheet: S15
Table S15. MZ discordant within-pair EWAS in adults, RH vs LH (adjusted)
	CHR	Position	Gene	Gene region	Weight	Estimate	t	CI low	CI high	p-value	q-value	Direction
cg12760522	chr14	83513860			83	-0.013377	-5.18016	-0.0185141	-0.00823986	1.55653e-06	0.999944	--
cg27340584	chr6	100439050	MCHR2;MCHR2	5'UTR;5'UTR	83	-0.0145781	-5.00001	-0.0203782	-0.00877804	3.20226e-06	0.999944	--
cg02676199	chr14	23016309			84	-0.01336	-4.90299	-0.0187797	-0.00794036	4.62302e-06	0.999944	--
cg20104456	chr19	51568523	KLK13	TSS200	82	-0.00577216	-4.79723	-0.0081662	-0.00337812	7.22129e-06	0.999944	--
cg09296044	chr15	43477606	CCNDBP1;CCNDBP1;CCNDBP1;CCNDBP1;CCNDBP1	1stExon;Body;TSS1500;5'UTR;Body	65	-0.0830213	-4.70965	-0.118237	-0.0478055	1.3778e-05	0.999944	--
cg27437721	chr10	134420300	INPP5A	Body	82	-0.0143132	-4.59749	-0.0205076	-0.00811876	1.55593e-05	0.999944	--
cg20023049	chr12	7295542	CLSTN3	Body	83	-0.00808408	-4.57997	-0.0115954	-0.00457275	1.64084e-05	0.999944	--
cg18053628	chr13	103294959	TPP2	Body	84	-0.0302915	-4.51077	-0.0436481	-0.0169349	2.10637e-05	0.999944	--
cg25166820	chr11	68177631	LRP5	Body	78	-0.0184043	-4.51672	-0.026518	-0.0102905	2.2296e-05	0.999944	--
cg21850254	chr19	37959853	ZNF570	TSS200	83	-0.00390156	-4.48293	-0.0056329	-0.00217023	2.36873e-05	0.999944	--
cg25257189	chr10	61666537	CCDC6	TSS200	83	-0.00123239	-4.41988	-0.00178707	-0.00067771	3.00013e-05	0.999944	--
cg12330998	chr2	42722347	KCNG3;KCNG3	TSS1500;TSS1500	82	-0.00292755	-4.41673	-0.00424638	-0.00160872	3.07188e-05	0.999944	--
cg15211655	chr18	21977340	OSBPL1A	5'UTR	79	-0.00391616	-4.421	-0.00567966	-0.00215265	3.13851e-05	0.999944	--
cg08692733	chr10	112404738	RBM20	Body	84	-0.0263242	-4.36844	-0.0383096	-0.0143387	3.59265e-05	0.999944	--
cg05894673	chr19	42747827	GSK3A	TSS1500	77	-0.0045428	-4.3827	-0.00660722	-0.00247837	3.70852e-05	0.999944	--
cg23378869	chr11	44630741	CD82;CD82	Body;Body	84	0.00589329	4.35539	0.00320202	0.00858455	3.7711e-05	0.999944	++
cg11323295	chr2	19986514			84	-0.0309358	-4.30992	-0.0452121	-0.0166594	4.46245e-05	0.999944	--
cg05480623	chr6	32815009	TAP1	Body	84	-0.0202111	-4.30704	-0.0295445	-0.0108778	4.51021e-05	0.999944	--
cg02653834	chr6	108169834			82	-0.00437272	-4.29253	-0.00639958	-0.00234587	4.861e-05	0.999944	--
cg00463551	chr5	61708395	IPO11	TSS200	79	-0.00253049	-4.30027	-0.003702	-0.00135898	4.88891e-05	0.999944	--
cg21795544	chr5	42993440			84	-0.00574967	-4.26275	-0.00843242	-0.00306693	5.30862e-05	0.999944	--
cg07161172	chr15	71184870	LRRC49;THAP10	TSS200;TSS200	82	-0.00191696	-4.26387	-0.00281148	-0.00102243	5.39863e-05	0.999944	--
cg06766817	chr6	158515036	SYNJ2	Body	82	0.00715064	4.26173	0.0038122	0.0104891	5.44096e-05	0.999944	++
cg04371358	chr3	194808257	XXYLT1;XXYLT1	Body;Body	84	-0.020476	-4.24464	-0.0300707	-0.0108813	5.6729e-05	0.999944	--
cg24875634	chr14	75083434			83	-0.0134372	-4.23928	-0.0197427	-0.00713165	5.84428e-05	0.999944	--
cg23505015	chr15	57859418			83	-0.0194832	-4.21924	-0.0286692	-0.0102971	6.28718e-05	0.999944	--
cg21142153	chr1	78444553	FUBP1	Body	76	-0.00478836	-4.23264	-0.00704201	-0.00253471	6.46895e-05	0.999944	--
cg06931444	chr8	129874054			83	-0.0206921	-4.21074	-0.0304679	-0.0109164	6.48457e-05	0.999944	--
cg23124630	chr1	51208502	FAF1	Body	84	-0.0179343	-4.19911	-0.0264291	-0.00943948	6.69836e-05	0.999944	--
cg11157525	chr5	1378503			83	-0.0130019	-4.18082	-0.0191885	-0.00681533	7.22857e-05	0.999944	--
cg08763169	chr12	30990639			83	0.00780026	4.18059	0.00408853	0.011512	7.23449e-05	0.999944	++
cg10088477	chr19	36182907			84	-0.016715	-4.15338	-0.0247195	-0.0087106	7.90682e-05	0.999944	--
cg07167493	chr1	85086352	LINC01461	Body	84	-0.0120845	-4.12935	-0.0179052	-0.00626385	8.62351e-05	0.999944	--
cg25960044	chr4	103656296	MANBA	Body	83	-0.0205633	-4.11229	-0.0305108	-0.0106158	9.25425e-05	0.999944	--
cg18216046	chr9	73484191	TRPM3;TRPM3;TRPM3;TRPM3;TRPM3;TRPM3;TRPM3;TRPM3;TRPM3	TSS1500;TSS1500;TSS1500;TSS1500;TSS1500;TSS1500;TSS1500;TSS1500;Body	83	-0.0277394	-4.10822	-0.0411716	-0.0143072	9.3906e-05	0.999944	--
cg07534157	chr20	3669782	SIGLEC1;SIGLEC1	ExonBnd;Body	84	-0.0133301	-4.10394	-0.0197904	-0.00686969	9.44925e-05	0.999944	--
cg07322402	chr15	66393410	MEGF11	Body	83	-0.0139045	-4.09985	-0.0206513	-0.00715782	9.67635e-05	0.999944	--
cg15339810	chr6	126277710	HINT3	TSS200	77	-0.0305686	-4.10179	-0.0454116	-0.0157257	0.00010194	0.999944	--
cg00865505	chr12	56351272	PMEL;PMEL;PMEL	Body;Body;Body	82	-0.0157338	-4.08361	-0.0233999	-0.00806771	0.000103498	0.999944	--
cg15996950	chr13	112282703			84	0.0126843	4.05631	0.00646473	0.0189039	0.000112056	0.999944	++
cg26676468	chr5	112539223	MCC;MCC	Body;Body	84	-0.0358104	-4.03752	-0.0534512	-0.0181695	0.000119818	0.999944	--
cg09713125	chr7	45077876	CCM2;CCM2;CCM2;CCM2;CCM2	Body;Body;Body;Body;Body	82	-0.014056	-4.04042	-0.0209778	-0.00713417	0.00012068	0.999944	--
cg12222906	chr2	20738909			82	-0.0194647	-4.03953	-0.0290521	-0.00987727	0.000121063	0.999944	--
cg06177967	chr1	27332971	FAM46B	Body	83	-0.00607987	-4.03698	-0.00907587	-0.00308387	0.000121086	0.999944	--
cg12670073	chr20	56287532	PMEPA1	TSS1500	84	-0.00842384	-4.02968	-0.0125817	-0.00426603	0.000123202	0.999944	--
cg17052783	chr17	1814742			79	0.00800929	4.04096	0.00406338	0.0119552	0.000123838	0.999944	++
cg00804324	chr21	44490289	CBS;CBS;CBS	Body;Body;Body	83	-0.028154	-4.0284	-0.0420571	-0.0142509	0.000124832	0.999944	--
cg16863920	chr14	24836447	NFATC4;NFATC4;NFATC4;NFATC4	TSS1500;TSS1500;Body;Body	81	-0.00268725	-4.01759	-0.00401834	-0.00135615	0.000132004	0.999944	--
cg25579477	chr7	151496334	PRKAG2;PRKAG2	5'UTR;Body	84	-0.0207994	-4.00988	-0.0311162	-0.0104826	0.000132173	0.999944	--
cg23583420	chr9	115913515	SLC31A2	Body	76	-0.00314661	-4.03061	-0.0047018	-0.00159142	0.000132278	0.999944	--
cg15672725	chr2	85838476	C2orf68;USP39;USP39;USP39	Body;TSS1500;TSS1500;Body	81	-0.0176157	-4.01509	-0.0263469	-0.00888456	0.000133174	0.999944	--
cg11493038	chr5	158583464			83	0.0265473	4.00789	0.0133705	0.039724	0.000134237	0.999944	++
cg08976342	chr10	31318135	ZNF438;ZNF438;ZNF438;ZNF438;ZNF438;ZNF438;ZNF438	5'UTR;5'UTR;5'UTR;5'UTR;5'UTR;5'UTR;Body	84	-0.0141795	-4.0054	-0.0212206	-0.0071384	0.000134286	0.999944	--
cg02045559	chr21	43540621	UMODL1;UMODL1;UMODL1;UMODL1	Body;Body;Body;Body	70	-0.0305422	-4.04396	-0.0456092	-0.0154753	0.000134907	0.999944	--
cg17406148	chr7	87257356	RUNDC3B;RUNDC3B;ABCB1;RUNDC3B	TSS1500;TSS1500;5'UTR;TSS1500	83	-0.00228	-4.0029	-0.00341309	-0.00114691	0.000136623	0.999944	--
cg06335372	chr3	42806748	CCDC13	5'UTR	83	-0.0172209	-4.00216	-0.0257807	-0.00866104	0.000136983	0.999944	--
cg14263489	chr11	62378600	EML3;EML3;EML3	Body;Body;Body	81	-0.0161515	-4.00574	-0.0241756	-0.00812739	0.000137632	0.999944	--
cg19620629	chr10	132007272			84	0.00855541	3.99377	0.00429468	0.0128161	0.000139932	0.999944	++
cg11498487	chr8	131309621	ASAP1IT1;ASAP1	TSS1500;Body	84	-0.0155201	-3.99295	-0.023251	-0.00778929	0.000140335	0.999944	--
cg12043561	chr19	4152810	CREB3L3;CREB3L3;CREB3L3;CREB3L3	TSS1500;TSS1500;TSS1500;TSS1500	83	-0.0175854	-3.99385	-0.0263447	-0.00882621	0.000141062	0.999944	--
cg25029444	chr10	47623455	ANTXRLP1;ANTXRLP1	Body;Body	83	-0.0180486	-3.99202	-0.0270427	-0.00905457	0.000141977	0.999944	--
cg16240683	chr1	23697258	C1orf213;C1orf213;C1orf213;ZNF436	3'UTR;Body;1stExon;TSS1500	83	-0.0232003	-3.98758	-0.0347745	-0.0116262	0.000144217	0.999944	--
cg04819351	chr15	36872220	C15orf41	Body	84	-0.0198927	-3.97912	-0.0298361	-0.00994935	0.000147363	0.999944	--
cg02957042	chr3	15201510			84	-0.0252837	-3.97761	-0.0379266	-0.0126409	0.000148151	0.999944	--
cg21151950	chr7	1718485			80	-0.0056008	-3.98454	-0.00839865	-0.00280296	0.000149596	0.999944	--
cg09361491	chr1	47070176	MKNK1;MKNK1;MKNK1;MKNK1;MKNK1	TSS1500;TSS1500;TSS1500;TSS1500;TSS1500	83	-0.00396992	-3.97662	-0.00595589	-0.00198395	0.000149893	0.999944	--
cg01559787	chr19	19416804	SF4	Body	83	-0.011051	-3.97538	-0.0165811	-0.00552098	0.000150549	0.999944	--
cg17154057	chr2	42722051	KCNG3;KCNG3	TSS1500;TSS1500	82	-0.00211831	-3.97405	-0.00317888	-0.00105773	0.000152527	0.999944	--
cg05204315	chr10	129245728	DOCK1	Body	82	0.00938487	3.97187	0.00468357	0.0140862	0.000153697	0.999944	++
cg19888509	chr12	125145641			80	-0.0106534	-3.97575	-0.015987	-0.0053198	0.00015427	0.999944	--
cg14125542	chr2	16796185	FAM49A	5'UTR	84	-0.0169669	-3.96595	-0.0254759	-0.00845784	0.000154362	0.999944	--
cg14212442	chr13	44816973			84	-0.00953765	-3.96594	-0.0143209	-0.00475442	0.000154368	0.999944	--
cg25013011	chr12	130389010	TMEM132D	TSS1500	81	-0.00471922	-3.9728	-0.00708319	-0.00235526	0.000154515	0.999944	--
cg09379385	chr6	27774865	HIST1H2AI	TSS1500	83	-0.00495988	-3.96022	-0.00745135	-0.00246841	0.000158788	0.999944	--
cg15405028	chr17	20945555	USP22	Body	81	-0.00317906	-3.95418	-0.00477902	-0.0015791	0.000164912	0.999944	--
cg15806732	chr1	67886406	SERBP1;SERBP1;SERBP1;SERBP1	Body;Body;Body;Body	84	-0.0239955	-3.94192	-0.0361028	-0.0118882	0.000167969	0.999944	--
cg02337166	chr17	38257303	NR1D1	TSS1500	79	-0.0037942	-3.95184	-0.00570563	-0.00188277	0.000169182	0.999944	--
cg10841124	chr5	433274	AHRR	Body	83	-0.0170579	-3.93474	-0.0256821	-0.00843382	0.000173624	0.999944	--
cg14375111	chr3	14165186	TMEM43;CHCHD4;CHCHD4	TSS1500;Body;5'UTR	84	-0.0196591	-3.92828	-0.0296129	-0.00970535	0.000176197	0.999944	--
cg06072822	chr13	113652069	MCF2L;MCF2L	Body;Body	84	-0.0125883	-3.9271	-0.0189639	-0.00621271	0.000176924	0.999944	--
cg24110768	chr12	58159478	CYP27B1	Body	81	-0.00731199	-3.93074	-0.0110139	-0.00361007	0.000178964	0.999944	--
cg25975192	chr4	897587	GAK	Body	84	-0.0193706	-3.91394	-0.0292142	-0.00952696	0.000185261	0.999944	--
cg04136449	chr1	221920271			84	0.00850216	3.91368	0.0041813	0.012823	0.000185428	0.999944	++
cg20715780	chr1	186814701	PLA2G4A	5'UTR	83	0.0169633	3.91266	0.00833861	0.0255879	0.000187545	0.999944	++
cg09159452	chr7	2609861	IQCE;IQCE	Body;Body	84	-0.0171624	-3.90913	-0.0258946	-0.00843019	0.0001884	0.999944	--
cg18598016	chr22	39641127	PDGFB	TSS200	78	-0.00770661	-3.92249	-0.0116189	-0.00379435	0.000188975	0.999944	--
cg14122138	chr17	36719737	SRCIN1	Body	78	0.0106987	3.91657	0.0052593	0.0161381	0.000192883	0.999944	++
cg06443042	chr11	31327199	DCDC1	Body	83	-0.00987353	-3.90378	-0.014905	-0.00484211	0.000193436	0.999944	--
cg04755227	chr16	88449254			84	-0.011771	-3.8991	-0.0177755	-0.00576652	0.000195112	0.999944	--
cg16486836	chr17	1456888	PITPNA	Body	83	-0.0264198	-3.90085	-0.0398932	-0.0129465	0.00019542	0.999944	--
cg14257107	chr1	145510921	GNRHR2;RBM8A	Body;3'UTR	84	-0.0212949	-3.89696	-0.0321636	-0.0104263	0.000196571	0.999944	--
cg13966883	chr4	185940549	HELT	Body	78	-0.00338478	-3.90599	-0.00511032	-0.00165923	0.000200054	0.999944	--
cg18655113	chr17	78152199	CARD14;CARD14;CARD14	TSS200;TSS200;Body	83	-0.00238528	-3.89409	-0.00360382	-0.00116675	0.000200072	0.999944	--
cg13681853	chr17	17766145	TOM1L2;TOM1L2;TOM1L2;TOM1L2;TOM1L2;TOM1L2;TOM1L2;TOM1L2;TOM1L2;TOM1L2;TOM1L2;TOM1L2	ExonBnd;ExonBnd;ExonBnd;ExonBnd;ExonBnd;ExonBnd;Body;Body;Body;Body;Body;Body	84	-0.0115991	-3.88874	-0.0175316	-0.00566654	0.000202282	0.999944	--
cg03370752	chr11	61136373	TMEM138;TMEM138	3'UTR;Body	82	-0.032506	-3.89161	-0.0491255	-0.0158864	0.000203388	0.999944	--
cg19411980	chr17	18056388	MYO15A	Body	84	-0.0189011	-3.88526	-0.028577	-0.00922517	0.000204744	0.999944	--
cg05632718	chr20	49066839			84	0.0220116	3.87915	0.0107256	0.0332976	0.000209144	0.999944	++
cg15598952	chr16	12549470	SNX29	Body	82	0.00660287	3.88305	0.00321954	0.00998621	0.000209514	0.999944	++
cg16614500	chr11	694704	TMEM80;DEAF1;TMEM80	TSS1500;Body;TSS1500	78	-0.00814796	-3.89248	-0.0123162	-0.00397975	0.000209585	0.999944	--
cg04884798	chr14	24791720	ADCY4	Body	84	-0.013173	-3.87193	-0.0199398	-0.00640619	0.000214455	0.999944	--

## Sheet: S16
Table S16. MZ discordant within-pair EWAS in children, RH vs LH (basic)
	CHR	Position	Gene	Gene region	Weight	Estimate	t	CI low	CI high	p-value	q-value	Direction
cg12760522	chr14	83513860			85	-0.0135252	-5.33835	-0.0185635	-0.00848686	7.84351e-07	0.617842	--
cg02676199	chr14	23016309			86	-0.013129	-4.85696	-0.0185036	-0.00775446	5.37347e-06	0.999978	--
cg27340584	chr6	100439050	MCHR2;MCHR2	5'UTR;5'UTR	85	-0.0138976	-4.7909	-0.0196662	-0.00812895	7.07127e-06	0.999978	--
cg20023049	chr12	7295542	CLSTN3	Body	85	-0.00816483	-4.71155	-0.011611	-0.0047187	9.63216e-06	0.999978	--
cg09296044	chr15	43477606	CCNDBP1;CCNDBP1;CCNDBP1;CCNDBP1;CCNDBP1	1stExon;Body;TSS1500;5'UTR;Body	66	-0.0815445	-4.72813	-0.115988	-0.0471005	1.26002e-05	0.999978	--
cg08692733	chr10	112404738	RBM20	Body	86	-0.0265223	-4.53959	-0.0381386	-0.0149059	1.84239e-05	0.999978	--
cg20104456	chr19	51568523	KLK13	TSS200	84	-0.00542717	-4.54049	-0.00780453	-0.0030498	1.88199e-05	0.999978	--
cg05894673	chr19	42747827	GSK3A	TSS1500	79	-0.00454879	-4.51922	-0.00655267	-0.00254492	2.17823e-05	0.999978	--
cg18053628	chr13	103294959	TPP2	Body	86	-0.0297995	-4.49206	-0.0429893	-0.0166097	2.2074e-05	0.999978	--
cg06766817	chr6	158515036	SYNJ2	Body	84	0.0074597	4.48012	0.00414795	0.0107715	2.36483e-05	0.999978	++
cg25166820	chr11	68177631	LRP5	Body	80	-0.0179032	-4.47746	-0.0258621	-0.00994438	2.51188e-05	0.999978	--
cg04371358	chr3	194808257	XXYLT1;XXYLT1	Body;Body	86	-0.0207909	-4.44501	-0.0300908	-0.0114911	2.63728e-05	0.999978	--
cg12330998	chr2	42722347	KCNG3;KCNG3	TSS1500;TSS1500	84	-0.00289033	-4.43435	-0.00418674	-0.00159391	2.80887e-05	0.999978	--
cg27437721	chr10	134420300	INPP5A	Body	84	-0.0136233	-4.4016	-0.0197793	-0.00746733	3.17494e-05	0.999978	--
cg08763169	chr12	30990639			85	0.0080528	4.37496	0.00439245	0.0117131	3.46798e-05	0.999978	++
cg25257189	chr10	61666537	CCDC6	TSS200	85	-0.0011923	-4.35019	-0.00173734	-0.000647263	3.80318e-05	0.999978	--
cg07161172	chr15	71184870	LRRC49;THAP10	TSS200;TSS200	84	-0.00190963	-4.33148	-0.00278651	-0.00103275	4.12068e-05	0.999978	--
cg24875634	chr14	75083434			85	-0.013334	-4.31876	-0.0194738	-0.00719426	4.27369e-05	0.999978	--
cg05480623	chr6	32815009	TAP1	Body	86	-0.019838	-4.30977	-0.02899	-0.0106859	4.37303e-05	0.999978	--
cg00463551	chr5	61708395	IPO11	TSS200	81	-0.00248904	-4.30794	-0.00363886	-0.00133922	4.64539e-05	0.999978	--
cg09361491	chr1	47070176	MKNK1;MKNK1;MKNK1;MKNK1;MKNK1	TSS1500;TSS1500;TSS1500;TSS1500;TSS1500	85	-0.00417636	-4.24917	-0.0061309	-0.00222183	5.5239e-05	0.999978	--
cg25960044	chr4	103656296	MANBA	Body	85	-0.0206468	-4.2337	-0.0303448	-0.0109488	5.84634e-05	0.999978	--
cg11493038	chr5	158583464			85	0.0276728	4.23009	0.0146635	0.0406821	5.92416e-05	0.999978	++
cg15211655	chr18	21977340	OSBPL1A	5'UTR	80	-0.00348973	-4.24283	-0.00512687	-0.00185259	5.95606e-05	0.999978	--
cg06335372	chr3	42806748	CCDC13	5'UTR	85	-0.0176252	-4.22792	-0.0259152	-0.00933517	5.97122e-05	0.999978	--
cg07534157	chr20	3669782	SIGLEC1;SIGLEC1	ExonBnd;Body	86	-0.0133206	-4.21157	-0.0196092	-0.00703198	6.27912e-05	0.999978	--
cg10088477	chr19	36182907			86	-0.016475	-4.19729	-0.0242793	-0.00867075	6.61572e-05	0.999978	--
cg23378869	chr11	44630741	CD82;CD82	Body;Body	86	0.00561535	4.17547	0.00294144	0.00828925	7.16364e-05	0.999978	++
cg00804324	chr21	44490289	CBS;CBS;CBS	Body;Body;Body	85	-0.0287264	-4.16675	-0.0424363	-0.0150165	7.46302e-05	0.999978	--
cg15996950	chr13	112282703			86	0.0127039	4.16185	0.00663479	0.018773	7.52748e-05	0.999978	++
cg23124630	chr1	51208502	FAF1	Body	86	-0.0174228	-4.15453	-0.025761	-0.00908464	7.73048e-05	0.999978	--
cg24110768	chr12	58159478	CYP27B1	Body	83	-0.00754827	-4.15443	-0.0111627	-0.00393384	7.95202e-05	0.999978	--
cg04819351	chr15	36872220	C15orf41	Body	86	-0.0204193	-4.12927	-0.0302514	-0.0105873	8.47184e-05	0.999978	--
cg08504659	chr14	52734888	PTGDR	1stExon	83	-0.0052383	-4.13429	-0.00775884	-0.00271776	8.55081e-05	0.999978	--
cg14212442	chr13	44816973			86	-0.00970636	-4.12294	-0.0143872	-0.00502551	8.66819e-05	0.999978	--
cg14263489	chr11	62378600	EML3;EML3;EML3	Body;Body;Body	83	-0.0164552	-4.12655	-0.0243879	-0.00852252	8.79226e-05	0.999978	--
cg11498487	chr8	131309621	ASAP1IT1;ASAP1	TSS1500;Body	86	-0.015723	-4.10509	-0.0233383	-0.00810767	9.24532e-05	0.999978	--
cg02045559	chr21	43540621	UMODL1;UMODL1;UMODL1;UMODL1	Body;Body;Body;Body	72	-0.0305544	-4.14564	-0.0452503	-0.0158586	9.24591e-05	0.999978	--
cg04884798	chr14	24791720	ADCY4	Body	86	-0.0135571	-4.08543	-0.0201549	-0.0069592	9.92364e-05	0.999978	--
cg21850254	chr19	37959853	ZNF570	TSS200	84	-0.00334683	-4.08659	-0.00497574	-0.00171791	0.000100559	0.999978	--
cg25975192	chr4	897587	GAK	Body	86	-0.019866	-4.07873	-0.0295501	-0.0101818	0.000101656	0.999978	--
cg19888509	chr12	125145641			82	-0.0106084	-4.07116	-0.015793	-0.00542377	0.000108194	0.999978	--
cg02337166	chr17	38257303	NR1D1	TSS1500	81	-0.00380631	-4.0737	-0.00566576	-0.00194687	0.000108221	0.999978	--
cg21795544	chr5	42993440			85	-0.005056	-4.05924	-0.00753292	-0.00257908	0.00010994	0.999978	--
cg26676468	chr5	112539223	MCC;MCC	Body;Body	86	-0.0352581	-4.05633	-0.0525403	-0.0179758	0.00011016	0.999978	--
cg21151950	chr7	1718485			81	-0.00547445	-4.06246	-0.0081562	-0.0027927	0.000112629	0.999978	--
cg25277809	chr2	128453484			86	-0.0378944	-4.04901	-0.0565025	-0.0192864	0.000113085	0.999978	--
cg02960663	chr3	184279415	EPHB3	TSS200	86	-0.00217466	-4.0436	-0.00324396	-0.00110537	0.000115295	0.999978	--
cg11323295	chr2	19986514			85	-0.0289747	-4.04509	-0.0432189	-0.0147304	0.000115641	0.999978	--
cg08976342	chr10	31318135	ZNF438;ZNF438;ZNF438;ZNF438;ZNF438;ZNF438;ZNF438	5'UTR;5'UTR;5'UTR;5'UTR;5'UTR;5'UTR;Body	86	-0.0140017	-4.03183	-0.0209065	-0.00709685	0.000120248	0.999978	--
cg23505015	chr15	57859418			85	-0.0183927	-4.03077	-0.0274669	-0.00931853	0.000121702	0.999978	--
cg25579477	chr7	151496334	PRKAG2;PRKAG2	5'UTR;Body	86	-0.02107	-4.02684	-0.0314734	-0.0106666	0.000122408	0.999978	--
cg18655113	chr17	78152199	CARD14;CARD14;CARD14	TSS200;TSS200;Body	85	-0.00241113	-4.02458	-0.0036025	-0.00121975	0.00012441	0.999978	--
cg09713125	chr7	45077876	CCM2;CCM2;CCM2;CCM2;CCM2	Body;Body;Body;Body;Body	84	-0.0138004	-4.01757	-0.0206326	-0.00696832	0.000128618	0.999978	--
cg25029444	chr10	47623455	ANTXRLP1;ANTXRLP1	Body;Body	85	-0.0178169	-4.01464	-0.0266424	-0.00899151	0.000128887	0.999978	--
cg12043561	chr19	4152810	CREB3L3;CREB3L3;CREB3L3;CREB3L3	TSS1500;TSS1500;TSS1500;TSS1500	85	-0.0173648	-4.01458	-0.0259663	-0.00876319	0.000128915	0.999978	--
cg04136449	chr1	221920271			86	0.0085392	4.00806	0.00430318	0.0127752	0.000130875	0.999978	++
cg09379385	chr6	27774865	HIST1H2AI	TSS1500	85	-0.00492668	-4.0072	-0.00737159	-0.00248177	0.000132341	0.999978	--
cg18216046	chr9	73484191	TRPM3;TRPM3;TRPM3;TRPM3;TRPM3;TRPM3;TRPM3;TRPM3;TRPM3	TSS1500;TSS1500;TSS1500;TSS1500;TSS1500;TSS1500;TSS1500;TSS1500;Body	85	-0.0266349	-4.0033	-0.0398656	-0.0134042	0.000134185	0.999978	--
cg03567117	chr12	52448859	NR4A1;NR4A1	Body;Body	85	-0.0158402	-3.99967	-0.0237159	-0.00796457	0.000135924	0.999978	--
cg15672725	chr2	85838476	C2orf68;USP39;USP39;USP39	Body;TSS1500;TSS1500;Body	83	-0.0175442	-4.00074	-0.0262678	-0.00882054	0.000137672	0.999978	--
cg11157525	chr5	1378503			85	-0.0122952	-3.98924	-0.0184243	-0.00616615	0.000141039	0.999978	--
cg18598016	chr22	39641127	PDGFB	TSS200	80	-0.00765205	-3.99244	-0.011467	-0.00383708	0.000145512	0.999978	--
cg26987083	chr12	25422729			86	0.0132405	3.96868	0.00660713	0.0198738	0.00015049	0.999978	++
cg15339810	chr6	126277710	HINT3	TSS200	81	-0.0285225	-3.97635	-0.0427973	-0.0142477	0.000152602	0.999978	--
cg19411980	chr17	18056388	MYO15A	Body	86	-0.0187447	-3.96368	-0.0281474	-0.00934195	0.000153174	0.999978	--
cg05896042	chr19	11450090	RAB3D	5'UTR	86	-0.00112073	-3.96252	-0.00168308	-0.000558386	0.000153802	0.999978	--
cg19834134	chr7	82791675	PCLO;PCLO	1stExon;1stExon	84	-0.00188845	-3.96425	-0.00283592	-0.000940967	0.000155292	0.999978	--
cg21708468	chr21	43161947	RIPK4	Body	85	-0.013259	-3.96156	-0.0199148	-0.0066033	0.000155533	0.999978	--
cg02653834	chr6	108169834			83	-0.00374653	-3.95634	-0.00563035	-0.00186271	0.000160967	0.999978	--
cg00865505	chr12	56351272	PMEL;PMEL;PMEL	Body;Body;Body	84	-0.0150995	-3.94825	-0.022706	-0.00749303	0.000164278	0.999978	--
cg12670073	chr20	56287532	PMEPA1	TSS1500	86	-0.00807583	-3.93835	-0.0121529	-0.00399876	0.000167488	0.999978	--
cg07167493	chr1	85086352	LINC01461	Body	86	-0.0114378	-3.93469	-0.0172175	-0.00565807	0.000169662	0.999978	--
cg01986350	chr9	123639608	PHF19;PHF19;PHF19;PHF19	TSS200;TSS200;TSS200;Body	83	-0.000702125	-3.94126	-0.00105652	-0.000347733	0.000169707	0.999978	--
cg03114057	chr17	72362302	GPR142	TSS1500	86	-0.015139	-3.93276	-0.0227928	-0.00748525	0.000170814	0.999978	--
cg04898835	chr2	240444554			85	-0.0165287	-3.93479	-0.0248821	-0.00817523	0.000170892	0.999978	--
cg25009733	chr2	233886711			86	-0.0177806	-3.92686	-0.0267834	-0.00877784	0.0001744	0.999978	--
cg06123807	chr7	2761760			85	-0.00454219	-3.92722	-0.0068422	-0.00224218	0.000175497	0.999978	--
cg25278559	chr16	84546838			85	-0.0169535	-3.92693	-0.0255388	-0.0083682	0.000175673	0.999978	--
cg06931444	chr8	129874054			85	-0.0191929	-3.92308	-0.0289218	-0.00946403	0.000178061	0.999978	--
cg23583420	chr9	115913515	SLC31A2	Body	78	-0.00303033	-3.93915	-0.00456217	-0.00149849	0.000178391	0.999978	--
cg09159452	chr7	2609861	IQCE;IQCE	Body;Body	86	-0.0171242	-3.91826	-0.0258137	-0.00843475	0.000179746	0.999978	--
cg19620629	chr10	132007272			85	0.00820446	3.9194	0.00404172	0.0123672	0.00018037	0.999978	++
cg10198568	chr10	13750689	FRMD4A	Body	86	-0.0252137	-3.9143	-0.038021	-0.0124064	0.000182262	0.999978	--
cg07124969	chr16	88356689			86	-0.0189632	-3.90752	-0.0286123	-0.00931415	0.000186642	0.999978	--
cg06072822	chr13	113652069	MCF2L;MCF2L	Body;Body	86	-0.0122616	-3.90709	-0.0185014	-0.00602186	0.000186923	0.999978	--
cg01665174	chr8	119756156			79	-0.0242746	-3.91904	-0.0366059	-0.0119433	0.000189577	0.999978	--
cg09328046	chr4	1505324			85	-0.0191923	-3.90357	-0.0289695	-0.0094151	0.000190646	0.999978	--
cg15598952	chr16	12549470	SNX29	Body	84	0.00650913	3.90558	0.00319428	0.00982397	0.000190748	0.999978	++
cg22163183	chr16	84257546	KCNG4	Body	86	-0.0175125	-3.90092	-0.0264384	-0.00858649	0.000191011	0.999978	--
cg25013011	chr12	130389010	TMEM132D	TSS1500	83	-0.00452988	-3.9007	-0.00684007	-0.00221968	0.000195526	0.999978	--
cg04031424	chr4	152198350	PRSS48	1stExon	85	-0.0110889	-3.89068	-0.0167568	-0.00542114	0.000199428	0.999978	--
cg02957042	chr3	15201510			86	-0.0242761	-3.88847	-0.036689	-0.0118631	0.000199507	0.999978	--
cg05632718	chr20	49066839			86	0.0217961	3.88592	0.0106439	0.0329483	0.000201295	0.999978	++
cg01642168	chr19	55791471	HSPBP1;HSPBP1;HSPBP1	5'UTR;5'UTR;1stExon	75	0.00559507	3.90513	0.00274025	0.00844988	0.000206176	0.999978	++
cg15933527	chr12	51632360	DAZAP2;DAZAP2;DAZAP2;DAZAP2;DAZAP2;DAZAP2	TSS200;TSS200;TSS200;TSS200;TSS200;TSS200	86	-0.00161639	-3.87827	-0.00244506	-0.000787717	0.000206737	0.999978	--
cg25049287	chr16	4091786	ADCY9	Body	78	-0.0154684	-3.89506	-0.0233762	-0.00756053	0.000207734	0.999978	--
cg07233212	chr12	103601576			82	0.0113627	3.88407	0.00554196	0.0171835	0.000208774	0.999978	++
cg20715780	chr1	186814701	PLA2G4A	5'UTR	85	0.0165893	3.86836	0.00806123	0.0251173	0.000215541	0.999978	++
cg12813510	chr11	120765757	GRIK4;GRIK4;GRIK4	Body;Body;Body	85	-0.0212517	-3.86799	-0.0321777	-0.0103258	0.000215823	0.999978	--

## Sheet: S17
Table S17. MZ discordant within-pair EWAS in children, Rh vs LH (adjusted)
	CHR	Position	Gene	Gene region	Weight	Estimate	t	CI low	CI high	p-value	q-value	Direction
cg12760522	chr14	83513860			83	-0.013377	-5.18016	-0.0185141	-0.00823986	1.55653e-06	0.999944	--
cg27340584	chr6	100439050	MCHR2;MCHR2	5'UTR;5'UTR	83	-0.0145781	-5.00001	-0.0203782	-0.00877804	3.20226e-06	0.999944	--
cg02676199	chr14	23016309			84	-0.01336	-4.90299	-0.0187797	-0.00794036	4.62302e-06	0.999944	--
cg20104456	chr19	51568523	KLK13	TSS200	82	-0.00577216	-4.79723	-0.0081662	-0.00337812	7.22129e-06	0.999944	--
cg09296044	chr15	43477606	CCNDBP1;CCNDBP1;CCNDBP1;CCNDBP1;CCNDBP1	1stExon;Body;TSS1500;5'UTR;Body	65	-0.0830213	-4.70965	-0.118237	-0.0478055	1.3778e-05	0.999944	--
cg27437721	chr10	134420300	INPP5A	Body	82	-0.0143132	-4.59749	-0.0205076	-0.00811876	1.55593e-05	0.999944	--
cg20023049	chr12	7295542	CLSTN3	Body	83	-0.00808408	-4.57997	-0.0115954	-0.00457275	1.64084e-05	0.999944	--
cg18053628	chr13	103294959	TPP2	Body	84	-0.0302915	-4.51077	-0.0436481	-0.0169349	2.10637e-05	0.999944	--
cg25166820	chr11	68177631	LRP5	Body	78	-0.0184043	-4.51672	-0.026518	-0.0102905	2.2296e-05	0.999944	--
cg21850254	chr19	37959853	ZNF570	TSS200	83	-0.00390156	-4.48293	-0.0056329	-0.00217023	2.36873e-05	0.999944	--
cg25257189	chr10	61666537	CCDC6	TSS200	83	-0.00123239	-4.41988	-0.00178707	-0.00067771	3.00013e-05	0.999944	--
cg12330998	chr2	42722347	KCNG3;KCNG3	TSS1500;TSS1500	82	-0.00292755	-4.41673	-0.00424638	-0.00160872	3.07188e-05	0.999944	--
cg15211655	chr18	21977340	OSBPL1A	5'UTR	79	-0.00391616	-4.421	-0.00567966	-0.00215265	3.13851e-05	0.999944	--
cg08692733	chr10	112404738	RBM20	Body	84	-0.0263242	-4.36844	-0.0383096	-0.0143387	3.59265e-05	0.999944	--
cg05894673	chr19	42747827	GSK3A	TSS1500	77	-0.0045428	-4.3827	-0.00660722	-0.00247837	3.70852e-05	0.999944	--
cg23378869	chr11	44630741	CD82;CD82	Body;Body	84	0.00589329	4.35539	0.00320202	0.00858455	3.7711e-05	0.999944	++
cg11323295	chr2	19986514			84	-0.0309358	-4.30992	-0.0452121	-0.0166594	4.46245e-05	0.999944	--
cg05480623	chr6	32815009	TAP1	Body	84	-0.0202111	-4.30704	-0.0295445	-0.0108778	4.51021e-05	0.999944	--
cg02653834	chr6	108169834			82	-0.00437272	-4.29253	-0.00639958	-0.00234587	4.861e-05	0.999944	--
cg00463551	chr5	61708395	IPO11	TSS200	79	-0.00253049	-4.30027	-0.003702	-0.00135898	4.88891e-05	0.999944	--
cg21795544	chr5	42993440			84	-0.00574967	-4.26275	-0.00843242	-0.00306693	5.30862e-05	0.999944	--
cg07161172	chr15	71184870	LRRC49;THAP10	TSS200;TSS200	82	-0.00191696	-4.26387	-0.00281148	-0.00102243	5.39863e-05	0.999944	--
cg06766817	chr6	158515036	SYNJ2	Body	82	0.00715064	4.26173	0.0038122	0.0104891	5.44096e-05	0.999944	++
cg04371358	chr3	194808257	XXYLT1;XXYLT1	Body;Body	84	-0.020476	-4.24464	-0.0300707	-0.0108813	5.6729e-05	0.999944	--
cg24875634	chr14	75083434			83	-0.0134372	-4.23928	-0.0197427	-0.00713165	5.84428e-05	0.999944	--
cg23505015	chr15	57859418			83	-0.0194832	-4.21924	-0.0286692	-0.0102971	6.28718e-05	0.999944	--
cg21142153	chr1	78444553	FUBP1	Body	76	-0.00478836	-4.23264	-0.00704201	-0.00253471	6.46895e-05	0.999944	--
cg06931444	chr8	129874054			83	-0.0206921	-4.21074	-0.0304679	-0.0109164	6.48457e-05	0.999944	--
cg23124630	chr1	51208502	FAF1	Body	84	-0.0179343	-4.19911	-0.0264291	-0.00943948	6.69836e-05	0.999944	--
cg11157525	chr5	1378503			83	-0.0130019	-4.18082	-0.0191885	-0.00681533	7.22857e-05	0.999944	--
cg08763169	chr12	30990639			83	0.00780026	4.18059	0.00408853	0.011512	7.23449e-05	0.999944	++
cg10088477	chr19	36182907			84	-0.016715	-4.15338	-0.0247195	-0.0087106	7.90682e-05	0.999944	--
cg07167493	chr1	85086352	LINC01461	Body	84	-0.0120845	-4.12935	-0.0179052	-0.00626385	8.62351e-05	0.999944	--
cg25960044	chr4	103656296	MANBA	Body	83	-0.0205633	-4.11229	-0.0305108	-0.0106158	9.25425e-05	0.999944	--
cg18216046	chr9	73484191	TRPM3;TRPM3;TRPM3;TRPM3;TRPM3;TRPM3;TRPM3;TRPM3;TRPM3	TSS1500;TSS1500;TSS1500;TSS1500;TSS1500;TSS1500;TSS1500;TSS1500;Body	83	-0.0277394	-4.10822	-0.0411716	-0.0143072	9.3906e-05	0.999944	--
cg07534157	chr20	3669782	SIGLEC1;SIGLEC1	ExonBnd;Body	84	-0.0133301	-4.10394	-0.0197904	-0.00686969	9.44925e-05	0.999944	--
cg07322402	chr15	66393410	MEGF11	Body	83	-0.0139045	-4.09985	-0.0206513	-0.00715782	9.67635e-05	0.999944	--
cg15339810	chr6	126277710	HINT3	TSS200	77	-0.0305686	-4.10179	-0.0454116	-0.0157257	0.00010194	0.999944	--
cg00865505	chr12	56351272	PMEL;PMEL;PMEL	Body;Body;Body	82	-0.0157338	-4.08361	-0.0233999	-0.00806771	0.000103498	0.999944	--
cg15996950	chr13	112282703			84	0.0126843	4.05631	0.00646473	0.0189039	0.000112056	0.999944	++
cg26676468	chr5	112539223	MCC;MCC	Body;Body	84	-0.0358104	-4.03752	-0.0534512	-0.0181695	0.000119818	0.999944	--
cg09713125	chr7	45077876	CCM2;CCM2;CCM2;CCM2;CCM2	Body;Body;Body;Body;Body	82	-0.014056	-4.04042	-0.0209778	-0.00713417	0.00012068	0.999944	--
cg12222906	chr2	20738909			82	-0.0194647	-4.03953	-0.0290521	-0.00987727	0.000121063	0.999944	--
cg06177967	chr1	27332971	FAM46B	Body	83	-0.00607987	-4.03698	-0.00907587	-0.00308387	0.000121086	0.999944	--
cg12670073	chr20	56287532	PMEPA1	TSS1500	84	-0.00842384	-4.02968	-0.0125817	-0.00426603	0.000123202	0.999944	--
cg17052783	chr17	1814742			79	0.00800929	4.04096	0.00406338	0.0119552	0.000123838	0.999944	++
cg00804324	chr21	44490289	CBS;CBS;CBS	Body;Body;Body	83	-0.028154	-4.0284	-0.0420571	-0.0142509	0.000124832	0.999944	--
cg16863920	chr14	24836447	NFATC4;NFATC4;NFATC4;NFATC4	TSS1500;TSS1500;Body;Body	81	-0.00268725	-4.01759	-0.00401834	-0.00135615	0.000132004	0.999944	--
cg25579477	chr7	151496334	PRKAG2;PRKAG2	5'UTR;Body	84	-0.0207994	-4.00988	-0.0311162	-0.0104826	0.000132173	0.999944	--
cg23583420	chr9	115913515	SLC31A2	Body	76	-0.00314661	-4.03061	-0.0047018	-0.00159142	0.000132278	0.999944	--
cg15672725	chr2	85838476	C2orf68;USP39;USP39;USP39	Body;TSS1500;TSS1500;Body	81	-0.0176157	-4.01509	-0.0263469	-0.00888456	0.000133174	0.999944	--
cg11493038	chr5	158583464			83	0.0265473	4.00789	0.0133705	0.039724	0.000134237	0.999944	++
cg08976342	chr10	31318135	ZNF438;ZNF438;ZNF438;ZNF438;ZNF438;ZNF438;ZNF438	5'UTR;5'UTR;5'UTR;5'UTR;5'UTR;5'UTR;Body	84	-0.0141795	-4.0054	-0.0212206	-0.0071384	0.000134286	0.999944	--
cg02045559	chr21	43540621	UMODL1;UMODL1;UMODL1;UMODL1	Body;Body;Body;Body	70	-0.0305422	-4.04396	-0.0456092	-0.0154753	0.000134907	0.999944	--
cg17406148	chr7	87257356	RUNDC3B;RUNDC3B;ABCB1;RUNDC3B	TSS1500;TSS1500;5'UTR;TSS1500	83	-0.00228	-4.0029	-0.00341309	-0.00114691	0.000136623	0.999944	--
cg06335372	chr3	42806748	CCDC13	5'UTR	83	-0.0172209	-4.00216	-0.0257807	-0.00866104	0.000136983	0.999944	--
cg14263489	chr11	62378600	EML3;EML3;EML3	Body;Body;Body	81	-0.0161515	-4.00574	-0.0241756	-0.00812739	0.000137632	0.999944	--
cg19620629	chr10	132007272			84	0.00855541	3.99377	0.00429468	0.0128161	0.000139932	0.999944	++
cg11498487	chr8	131309621	ASAP1IT1;ASAP1	TSS1500;Body	84	-0.0155201	-3.99295	-0.023251	-0.00778929	0.000140335	0.999944	--
cg12043561	chr19	4152810	CREB3L3;CREB3L3;CREB3L3;CREB3L3	TSS1500;TSS1500;TSS1500;TSS1500	83	-0.0175854	-3.99385	-0.0263447	-0.00882621	0.000141062	0.999944	--
cg25029444	chr10	47623455	ANTXRLP1;ANTXRLP1	Body;Body	83	-0.0180486	-3.99202	-0.0270427	-0.00905457	0.000141977	0.999944	--
cg16240683	chr1	23697258	C1orf213;C1orf213;C1orf213;ZNF436	3'UTR;Body;1stExon;TSS1500	83	-0.0232003	-3.98758	-0.0347745	-0.0116262	0.000144217	0.999944	--
cg04819351	chr15	36872220	C15orf41	Body	84	-0.0198927	-3.97912	-0.0298361	-0.00994935	0.000147363	0.999944	--
cg02957042	chr3	15201510			84	-0.0252837	-3.97761	-0.0379266	-0.0126409	0.000148151	0.999944	--
cg21151950	chr7	1718485			80	-0.0056008	-3.98454	-0.00839865	-0.00280296	0.000149596	0.999944	--
cg09361491	chr1	47070176	MKNK1;MKNK1;MKNK1;MKNK1;MKNK1	TSS1500;TSS1500;TSS1500;TSS1500;TSS1500	83	-0.00396992	-3.97662	-0.00595589	-0.00198395	0.000149893	0.999944	--
cg01559787	chr19	19416804	SF4	Body	83	-0.011051	-3.97538	-0.0165811	-0.00552098	0.000150549	0.999944	--
cg17154057	chr2	42722051	KCNG3;KCNG3	TSS1500;TSS1500	82	-0.00211831	-3.97405	-0.00317888	-0.00105773	0.000152527	0.999944	--
cg05204315	chr10	129245728	DOCK1	Body	82	0.00938487	3.97187	0.00468357	0.0140862	0.000153697	0.999944	++
cg19888509	chr12	125145641			80	-0.0106534	-3.97575	-0.015987	-0.0053198	0.00015427	0.999944	--
cg14125542	chr2	16796185	FAM49A	5'UTR	84	-0.0169669	-3.96595	-0.0254759	-0.00845784	0.000154362	0.999944	--
cg14212442	chr13	44816973			84	-0.00953765	-3.96594	-0.0143209	-0.00475442	0.000154368	0.999944	--
cg25013011	chr12	130389010	TMEM132D	TSS1500	81	-0.00471922	-3.9728	-0.00708319	-0.00235526	0.000154515	0.999944	--
cg09379385	chr6	27774865	HIST1H2AI	TSS1500	83	-0.00495988	-3.96022	-0.00745135	-0.00246841	0.000158788	0.999944	--
cg15405028	chr17	20945555	USP22	Body	81	-0.00317906	-3.95418	-0.00477902	-0.0015791	0.000164912	0.999944	--
cg15806732	chr1	67886406	SERBP1;SERBP1;SERBP1;SERBP1	Body;Body;Body;Body	84	-0.0239955	-3.94192	-0.0361028	-0.0118882	0.000167969	0.999944	--
cg02337166	chr17	38257303	NR1D1	TSS1500	79	-0.0037942	-3.95184	-0.00570563	-0.00188277	0.000169182	0.999944	--
cg10841124	chr5	433274	AHRR	Body	83	-0.0170579	-3.93474	-0.0256821	-0.00843382	0.000173624	0.999944	--
cg14375111	chr3	14165186	TMEM43;CHCHD4;CHCHD4	TSS1500;Body;5'UTR	84	-0.0196591	-3.92828	-0.0296129	-0.00970535	0.000176197	0.999944	--
cg06072822	chr13	113652069	MCF2L;MCF2L	Body;Body	84	-0.0125883	-3.9271	-0.0189639	-0.00621271	0.000176924	0.999944	--
cg24110768	chr12	58159478	CYP27B1	Body	81	-0.00731199	-3.93074	-0.0110139	-0.00361007	0.000178964	0.999944	--
cg25975192	chr4	897587	GAK	Body	84	-0.0193706	-3.91394	-0.0292142	-0.00952696	0.000185261	0.999944	--
cg04136449	chr1	221920271			84	0.00850216	3.91368	0.0041813	0.012823	0.000185428	0.999944	++
cg20715780	chr1	186814701	PLA2G4A	5'UTR	83	0.0169633	3.91266	0.00833861	0.0255879	0.000187545	0.999944	++
cg09159452	chr7	2609861	IQCE;IQCE	Body;Body	84	-0.0171624	-3.90913	-0.0258946	-0.00843019	0.0001884	0.999944	--
cg18598016	chr22	39641127	PDGFB	TSS200	78	-0.00770661	-3.92249	-0.0116189	-0.00379435	0.000188975	0.999944	--
cg14122138	chr17	36719737	SRCIN1	Body	78	0.0106987	3.91657	0.0052593	0.0161381	0.000192883	0.999944	++
cg06443042	chr11	31327199	DCDC1	Body	83	-0.00987353	-3.90378	-0.014905	-0.00484211	0.000193436	0.999944	--
cg04755227	chr16	88449254			84	-0.011771	-3.8991	-0.0177755	-0.00576652	0.000195112	0.999944	--
cg16486836	chr17	1456888	PITPNA	Body	83	-0.0264198	-3.90085	-0.0398932	-0.0129465	0.00019542	0.999944	--
cg14257107	chr1	145510921	GNRHR2;RBM8A	Body;3'UTR	84	-0.0212949	-3.89696	-0.0321636	-0.0104263	0.000196571	0.999944	--
cg13966883	chr4	185940549	HELT	Body	78	-0.00338478	-3.90599	-0.00511032	-0.00165923	0.000200054	0.999944	--
cg18655113	chr17	78152199	CARD14;CARD14;CARD14	TSS200;TSS200;Body	83	-0.00238528	-3.89409	-0.00360382	-0.00116675	0.000200072	0.999944	--
cg13681853	chr17	17766145	TOM1L2;TOM1L2;TOM1L2;TOM1L2;TOM1L2;TOM1L2;TOM1L2;TOM1L2;TOM1L2;TOM1L2;TOM1L2;TOM1L2	ExonBnd;ExonBnd;ExonBnd;ExonBnd;ExonBnd;ExonBnd;Body;Body;Body;Body;Body;Body	84	-0.0115991	-3.88874	-0.0175316	-0.00566654	0.000202282	0.999944	--
cg03370752	chr11	61136373	TMEM138;TMEM138	3'UTR;Body	82	-0.032506	-3.89161	-0.0491255	-0.0158864	0.000203388	0.999944	--
cg19411980	chr17	18056388	MYO15A	Body	84	-0.0189011	-3.88526	-0.028577	-0.00922517	0.000204744	0.999944	--
cg05632718	chr20	49066839			84	0.0220116	3.87915	0.0107256	0.0332976	0.000209144	0.999944	++
cg15598952	chr16	12549470	SNX29	Body	82	0.00660287	3.88305	0.00321954	0.00998621	0.000209514	0.999944	++
cg16614500	chr11	694704	TMEM80;DEAF1;TMEM80	TSS1500;Body;TSS1500	78	-0.00814796	-3.89248	-0.0123162	-0.00397975	0.000209585	0.999944	--
cg04884798	chr14	24791720	ADCY4	Body	84	-0.013173	-3.87193	-0.0199398	-0.00640619	0.000214455	0.999944	--

## Sheet: S18
Table S18. Handedness, EWAS, ALSPAC at birth, RH vs LH (basic model )
	CHR	Position	Gene	Gene region	Weight	Estimate	SE	p-value	q-value	Direction
cg20157693	1	1419379	ATAD3B	Body	697	-0.0163213	0.00335215	1.40257e-06	0.661265	--
cg18531146	11	12715649	TEAD1	5'UTR	694	-0.00448783	0.00097578	5.07887e-06	1	--
cg20126878	20	57464571	GNAS;GNAS;GNAS;GNAS	3'UTR;Body;3'UTR;Body	703	0.0239832	0.00536203	9.06168e-06	1	++
cg10753298	10	98807172	SLIT1	Body	703	-0.0322972	0.00722092	9.06419e-06	1	--
cg01395898	5	68629755			691	-0.0220964	0.00502746	1.2894e-05	1	--
cg14071869	6	41624407			701	0.0187724	0.00428886	1.39508e-05	1	++
cg17454831	2	66667073	MEIS1	Body	703	-0.0221365	0.0051213	1.77639e-05	1	--
cg13187967	11	13485012	BTBD10	TSS200	697	0.00326452	0.000776921	3.00754e-05	1	++
cg08668281	13	25726655			703	0.0497902	0.0119725	3.61482e-05	1	++
cg07651452	2	240323957	HDAC4	TSS1500	697	-0.0101262	0.00244505	3.89331e-05	1	--
cg27311476	18	77794419	C18orf22;C18orf22	5'UTR;1stExon	699	0.00158562	0.00038443	4.18139e-05	1	++
cg14138610	19	58338986	FKBP1AP1	TSS200	703	-0.0193569	0.00472092	4.63196e-05	1	--
cg25629326	8	95274342	GEM;GEM;GEM	5'UTR;5'UTR;1stExon	698	0.00752278	0.00184904	5.29736e-05	1	++
cg21534486	5	43557482	PAIP1;PAIP1;PAIP1;PAIP1	5'UTR;TSS1500;1stExon;TSS1500	699	0.00110094	0.000270978	5.42296e-05	1	++
cg02906827	16	84217575	TAF1C;TAF1C	5'UTR;Body	690	-0.0173558	0.00428396	5.69819e-05	1	--
cg20017797	14	24563410	PCK2;PCK2	TSS200;TSS200	700	0.00135544	0.000334737	5.73819e-05	1	++
cg09044296	5	176739296	MXD3;MXD3	TSS200;TSS200	698	0.00990424	0.00245724	6.20314e-05	1	++
cg01288184	18	20811408	CABLES1;CABLES1;CABLES1	Body;Body;Body	703	-0.00997857	0.00248487	6.59311e-05	1	--
cg05068146	1	6507693	ESPN	Body	698	0.00604949	0.00150766	6.68709e-05	1	++
cg03803811	16	54962045			689	0.00731491	0.00182477	6.8034e-05	1	++
cg06807726	18	74090695	ZNF516	Body	700	-0.0229755	0.00574628	7.08827e-05	1	--
cg00043095	2	223289277	SGPP2	TSS200	699	0.00194792	0.000489502	7.66397e-05	1	++
cg27551227	7	154877217	HTR5A	3'UTR	701	-0.0296168	0.00744453	7.69504e-05	1	--
cg01459116	15	41954072	MGA;MGA	5'UTR;5'UTR	700	-0.00754761	0.00189943	7.84645e-05	1	--
cg09824615	14	77600014	ZDHHC22	3'UTR	703	0.0292857	0.00737499	7.92979e-05	1	++
cg00067414	6	151188081	MTHFD1L	Body	687	0.00229452	0.000579462	8.32232e-05	1	++
cg15656901	18	67873348	RTTN	TSS1500	694	0.00240545	0.000607683	8.35952e-05	1	++
cg08723131	20	55043694	C20orf43;C20orf43	1stExon;5'UTR	689	0.0030611	0.000774174	8.51667e-05	1	++
cg16513467	10	28822500	WAC;WAC;WAC;WAC;WAC	1stExon;5'UTR;1stExon;5'UTR;Body	700	0.00629872	0.00159339	8.53721e-05	1	++
cg14365143	21	48088046			699	0.00511981	0.00129568	8.5935e-05	1	++
cg26332285	10	134915746	GPR123	Body	702	-0.0253625	0.00642528	8.73651e-05	1	--
cg07174177	17	46988726	UBE2Z	Body	701	0.0280446	0.00710578	8.75794e-05	1	++
cg26959053	7	129073870	FAM40B;FAM40B	TSS1500;TSS1500	700	-0.00315906	0.000800541	8.77963e-05	1	--
cg01274643	11	1283946			604	0.00251328	0.00064212	0.000101661	1	++
cg17468569	1	162041135	NOS1AP;NOS1AP	Body;Body	702	-0.0188915	0.00485147	0.000108461	1	--
cg04747678	19	45805662	MARK4	Body	696	-0.0285277	0.00733331	0.000110241	1	--
cg24884572	19	58661833	ZNF329	5'UTR	696	0.00124154	0.000319559	0.00011248	1	++
cg17819489	7	50862067	GRB10	TSS1500	686	0.0177793	0.00459063	0.000118302	1	++
cg03144446	7	20366667			703	-0.0342825	0.00886146	0.000120045	1	--
cg12178465	12	57405251	TAC3	3'UTR	697	0.0198591	0.00513439	0.00012056	1	++
cg15708382	8	102903909	NCALD;NCALD;NCALD;NCALD;NCALD;NCALD;NCALD	5'UTR;5'UTR;5'UTR;5'UTR;5'UTR;5'UTR;5'UTR	701	-0.00395884	0.00102541	0.000123968	1	--
cg26762050	16	67022599	CES8	TSS200	695	-0.0184977	0.0048036	0.000129111	1	--
cg21364719	18	72919061	ZADH2	Body	700	-0.0159067	0.00413547	0.000131304	1	--
cg06589507	5	179234594	SQSTM1;SQSTM1;MGAT4B	5'UTR;5'UTR;TSS1500	693	0.0124614	0.00323986	0.000131502	1	++
cg22469274	7	27187553	HOXA6	TSS200	618	0.00192396	0.000502163	0.000141155	1	++
cg15557486	10	135207703	MTG1;MTG1	1stExon;5'UTR	702	0.00151648	0.000396191	0.000141459	1	++
cg10600851	12	132650493			703	0.0336955	0.0088035	0.00014151	1	++
cg15911651	3	33427876	FBXL2	3'UTR	703	-0.023436	0.00612493	0.000142177	1	--
cg16692781	19	21937852	ZNF100	Body	702	-0.0136128	0.00356253	0.000145185	1	--
cg01780164	14	70343734			699	-0.0215264	0.00563883	0.000147307	1	--
cg22627826	19	1240265	ATP5D;ATP5D	TSS1500;TSS1500	693	0.000868836	0.000228088	0.000152358	1	++
cg08824335	9	38622360	C9orf122	Body	702	-0.0085024	0.00224048	0.000161031	1	--
cg12177010	15	44083728	SERF2	TSS1500	684	-0.012768	0.00336835	0.000164193	1	--
cg10129665	12	54133618			694	0.0121344	0.00320535	0.000167175	1	++
cg25017620	1	247802802			694	0.0249876	0.00660246	0.000167881	1	++
cg25049374	6	27560507			694	-0.0126138	0.00333495	0.000169396	1	--
cg08004919	12	56652272	ANKRD52	TSS200	699	0.00147392	0.000389815	0.000170124	1	++
cg25519033	11	695585	TMEM80;TMEM80;DEAF1;DEAF1	TSS200;TSS200;5'UTR;1stExon	699	0.000835827	0.000221109	0.000170727	1	++
cg20570458	3	124069933	KALRN;KALRN	Body;Body	696	0.0236758	0.00626797	0.000172746	1	++
cg16794406	11	46143014	PHF21A;PHF21A	TSS200;TSS200	702	0.00172847	0.000458052	0.000175178	1	++
cg03761979	4	57843892	C4orf14;POLR2B	TSS200;TSS1500	676	0.00307446	0.000814962	0.000176454	1	++
cg11222836	8	142203937	DENND3	Body	701	-0.0243465	0.00645857	0.000177884	1	--
cg24507519	7	2578674	C7orf27	Body	699	0.0289142	0.00768019	0.000181355	1	++
cg22586996	5	158523907	EBF1	Body	699	-0.0334977	0.00892009	0.000188202	1	--
cg16665614	15	61302584	RORA	Body	703	0.0292466	0.00779299	0.000189865	1	++
cg01705052	16	12996234	SHISA9;SHISA9	1stExon;1stExon	699	0.00132952	0.000354389	0.000190961	1	++
cg25449484	5	92929372	NR2F1	Body	691	0.00146838	0.000391633	0.000192798	1	++
cg26810816	20	708630			691	0.0106615	0.00284438	0.000193631	1	++
cg01800614	6	29719096	IFITM4P	TSS200	687	-0.0143836	0.00383866	0.000194676	1	--
cg19337241	10	102536137	PAX2;PAX2;PAX2;PAX2;PAX2	Body;Body;Body;Body;Body	698	0.0163749	0.00437608	0.000198338	1	++
cg16720616	2	149866889	KIF5C	Body	702	-0.0335564	0.00898339	0.000203341	1	--
cg12038521	19	2111714	AP3D1;AP3D1	Body;Body	703	-0.0139277	0.00373824	0.000211097	1	--
cg23791813	20	39317833	MAFB;MAFB	5'UTR;1stExon	702	0.00608925	0.00163734	0.000216709	1	++
cg08457169	2	242805904			703	0.0153216	0.00412145	0.000217933	1	++
cg00959636	6	134499464	SGK1;SGK1	Body;TSS1500	690	-0.00342293	0.00092196	0.00022241	1	--
cg05158566	1	171711606	VAMP4	TSS1500	694	0.00319328	0.000860136	0.000222422	1	++
cg26109568	2	105697685	MRPS9	Body	703	0.0322898	0.00870157	0.000223677	1	++
cg03562531	3	53764604	CACNA1D;CACNA1D;CACNA1D	Body;Body;Body	700	0.0209974	0.00565974	0.000224488	1	++
cg07908508	19	35417702	ZNF30;ZNF30;ZNF30;ZNF30	TSS200;TSS200;TSS200;TSS200	696	-0.00488968	0.00131842	0.000225645	1	--
cg21205320	2	3648280	COLEC11;COLEC11	5'UTR;5'UTR	700	-0.0299036	0.00806658	0.000226985	1	--
cg24361098	2	60748951	BCL11A;BCL11A;BCL11A	Body;Body;Body	703	0.0300316	0.00811178	0.000231218	1	++
cg17161421	6	32120077	PRRT1;PPT2	TSS1500;TSS1500	701	-0.0129574	0.00350114	0.000232451	1	--
cg24604604	1	115213147	DENND2C	TSS1500	681	-0.00617292	0.00166958	0.000236275	1	--
cg10563131	22	50636443	TRABD	Body	701	-0.0374906	0.0101496	0.000238933	1	--
cg14660726	1	221047545			699	0.0141249	0.00382517	0.000240069	1	++
cg13634501	15	60690026	ANXA2;ANXA2;ANXA2;ANXA2	5'UTR;5'UTR;Body;5'UTR	700	0.00453854	0.00122922	0.000240413	1	++
cg26675329	2	103033753	IL18RAP	TSS1500	702	-0.0199383	0.00540282	0.000242093	1	--
cg14493094	4	132896579			703	-0.0669539	0.0181433	0.000242117	1	--
cg15002713	2	19092241			702	0.0177384	0.0048075	0.000242656	1	++
cg20536983	8	13134166	DLC1	Body	696	0.00133326	0.000361428	0.000243651	1	++
cg25621096	1	151032116	CDC42SE1;CDC42SE1;CDC42SE1;MLLT11;CDC42SE1	5'UTR;1stExon;5'UTR;TSS200;1stExon	698	0.00915179	0.00248181	0.000244819	1	++
cg02250071	6	150465049	PPP1R14C	Body	690	0.00457979	0.0012438	0.000250238	1	++
cg20046040	8	121135930	COL14A1	TSS1500	653	0.004501	0.00122361	0.000254933	1	++
cg12051027	1	48931095	SPATA6	Body	703	0.0245418	0.0066798	0.000257739	1	++
cg22004069	19	5585648			702	0.0204587	0.00557231	0.000260274	1	++
cg05710090	12	34442705			703	0.0349129	0.0095119	0.000261301	1	++
cg15796978	2	48982509	LHCGR	Body	698	0.0146248	0.00398497	0.000261903	1	++
cg08020574	16	89557182	ANKRD11	TSS1500	698	0.00162552	0.000443076	0.000263189	1	++
cg00859314	19	46147548			700	0.0317239	0.00865715	0.000267437	1	++
cg20731798	11	36616365	C11orf74;RAG2	5'UTR;5'UTR	697	-0.00331421	0.000904731	0.000268843	1	--

## Sheet: S19
Table S19. Handedness, EWAS, ALSPAC at birth, RH vs LH (adjusted model )
	CHR	Position	Gene	Gene region	Weight	Estimate	SE	p-value	q-value	Direction
cg20157693	1	1419379	ATAD3B	Body	682	-0.0172132	0.00347694	9.43583e-07	0.444866	--
cg18531146	11	12715649	TEAD1	5'UTR	680	-0.00442455	0.000963086	5.22311e-06	1	--
cg01395898	5	68629755			676	-0.0229207	0.00508482	7.78636e-06	1	--
cg14138610	19	58338986	FKBP1AP1	TSS200	688	-0.0210693	0.00480057	1.32735e-05	1	--
cg16665614	15	61302584	RORA	Body	688	0.0345101	0.00795986	1.68276e-05	1	++
cg10753298	10	98807172	SLIT1	Body	688	-0.0319159	0.00736586	1.70193e-05	1	--
cg26823149	15	81673470			688	0.0334667	0.00780818	2.09112e-05	1	++
cg20126878	20	57464571	GNAS;GNAS;GNAS;GNAS	3'UTR;Body;3'UTR;Body	688	0.0228202	0.0053456	2.25381e-05	1	++
cg09824615	14	77600014	ZDHHC22	3'UTR	688	0.0323339	0.00757518	2.25938e-05	1	++
cg07174177	17	46988726	UBE2Z	Body	686	0.0304058	0.00720154	2.76293e-05	1	++
cg03803811	16	54962045			674	0.00779986	0.00186176	3.18709e-05	1	++
cg02906827	16	84217575	TAF1C;TAF1C	5'UTR;Body	675	-0.017921	0.00430489	3.56998e-05	1	--
cg17454831	2	66667073	MEIS1	Body	688	-0.0216333	0.00522193	3.88019e-05	1	--
cg04747678	19	45805662	MARK4	Body	681	-0.0308543	0.00746035	4.00269e-05	1	--
cg24507519	7	2578674	C7orf27	Body	684	0.0321058	0.00776345	4.00484e-05	1	++
cg24884572	19	58661833	ZNF329	5'UTR	681	0.00133192	0.000322971	4.20833e-05	1	++
cg11316517	5	72666838			684	0.0321553	0.00780701	4.29902e-05	1	++
cg06807726	18	74090695	ZNF516	Body	685	-0.0241238	0.0058889	4.72206e-05	1	--
cg12178465	12	57405251	TAC3	3'UTR	682	0.0203479	0.00498692	5.05811e-05	1	++
cg15656901	18	67873348	RTTN	TSS1500	680	0.0025097	0.000615119	5.0649e-05	1	++
cg09044296	5	176739296	MXD3;MXD3	TSS200;TSS200	683	0.0102352	0.0025099	5.1069e-05	1	++
cg26959053	7	129073870	FAM40B;FAM40B	TSS1500;TSS1500	685	-0.0032892	0.000812294	5.75448e-05	1	--
cg25449484	5	92929372	NR2F1	Body	676	0.00160933	0.000398763	6.09542e-05	1	++
cg26572488	7	132299669	PLXNA4	5'UTR	679	0.00342945	0.000853929	6.6114e-05	1	++
cg00067414	6	151188081	MTHFD1L	Body	674	0.00236062	0.000590339	7.10815e-05	1	++
cg06589507	5	179234594	SQSTM1;SQSTM1;MGAT4B	5'UTR;5'UTR;TSS1500	678	0.0129741	0.00324747	7.20972e-05	1	++
cg27311476	18	77794419	C18orf22;C18orf22	5'UTR;1stExon	684	0.00156406	0.000391828	7.3055e-05	1	++
cg15825264	17	655740	ELP2P;GEMIN4	TSS200;TSS1500	673	0.00290907	0.000729003	7.35567e-05	1	++
cg12177010	15	44083728	SERF2	TSS1500	669	-0.013565	0.00340093	7.41755e-05	1	--
cg25017620	1	247802802			681	0.0262895	0.0066765	9.11978e-05	1	++
cg01274643	11	1283946			591	0.00256276	0.000651702	9.4668e-05	1	++
cg04158730	1	242011433	EXO1;EXO1;EXO1	TSS1500;TSS200;TSS1500	687	0.00282527	0.000723205	0.000103324	1	++
cg01780164	14	70343734			684	-0.0222169	0.00569827	0.000106646	1	--
cg22586996	5	158523907	EBF1	Body	684	-0.035584	0.00915279	0.000111523	1	--
cg26332285	10	134915746	GPR123	Body	687	-0.0257767	0.00663045	0.000111541	1	--
cg13634501	15	60690026	ANXA2;ANXA2;ANXA2;ANXA2	5'UTR;5'UTR;Body;5'UTR	685	0.00497166	0.00127992	0.000113058	1	++
cg20706316	1	8398600	SLC45A1	Body	667	-0.00438802	0.00112977	0.000113533	1	--
cg07731455	3	14220336	LSM3;XPC;XPC;XPC;LSM3	1stExon;TSS200;TSS200;TSS200;5'UTR	680	0.00236203	0.00060918	0.000116345	1	++
cg14071869	6	41624407			686	0.0168935	0.00435733	0.000116412	1	++
cg23728669	11	63258734	HRASLS5;HRASLS5;HRASLS5	TSS200;TSS200;TSS200	673	0.00228107	0.000590092	0.000122094	1	++
cg08004919	12	56652272	ANKRD52	TSS200	684	0.00151908	0.000393123	0.000122623	1	++
cg08668281	13	25726655			688	0.0471693	0.0122259	0.000125535	1	++
cg08627768	10	11511100	USP6NL;USP6NL	Body;Body	688	0.0309867	0.00804815	0.000129595	1	++
cg14951193	19	4535211	PLIN5	TSS200	682	0.00146983	0.000382311	0.000132627	1	++
cg13972661	9	99776416	HIATL2	TSS1500	688	0.0335428	0.00875371	0.000139416	1	++
cg25060765	6	7680990			688	-0.0251128	0.00655734	0.000140595	1	--
cg24695972	1	117113752	CD58;CD58;CD58	TSS200;TSS200;TSS200	685	0.00905416	0.00236412	0.000140595	1	++
cg21205320	2	3648280	COLEC11;COLEC11	5'UTR;5'UTR	685	-0.0315246	0.00824632	0.000144527	1	--
cg20017797	14	24563410	PCK2;PCK2	TSS200;TSS200	685	0.00130351	0.000341664	0.000149004	1	++
cg00783952	10	134999606	KNDC1	Body	686	0.0331158	0.00868574	0.000150477	1	++
cg11222836	8	142203937	DENND3	Body	686	-0.0247988	0.00651447	0.000154055	1	--
cg17468569	1	162041135	NOS1AP;NOS1AP	Body;Body	687	-0.0188769	0.00495962	0.000154399	1	--
cg05068146	1	6507693	ESPN	Body	683	0.00572423	0.00150634	0.000158209	1	++
cg06259996	5	92921023	NR2F1	1stExon	673	-0.00612427	0.00161246	0.000159686	1	--
cg00348621	5	90680542	LOC100129716;ARRDC3	Body;TSS1500	688	-0.0166372	0.00438154	0.000159978	1	--
cg24604604	1	115213147	DENND2C	TSS1500	666	-0.00640175	0.00168843	0.000164017	1	--
cg27582527	1	15734285			688	-0.0275732	0.00728546	0.000167996	1	--
cg26810816	20	708630			676	0.0110284	0.00291466	0.000168879	1	++
cg23180938	5	115152485	CDO1	TSS200	682	0.00137713	0.000365197	0.000177467	1	++
cg01288184	18	20811408	CABLES1;CABLES1;CABLES1	Body;Body;Body	688	-0.00942538	0.00250127	0.000179211	1	--
cg16692781	19	21937852	ZNF100	Body	687	-0.0136676	0.00363242	0.000183172	1	--
cg01300852	6	166955885	RPS6KA2;RPS6KA2	Body;Body	667	-0.0118268	0.00314315	0.000183635	1	--
cg05710090	12	34442705			688	0.0361189	0.00964036	0.000195002	1	++
cg11691589	7	116165612	CAV1	Body	685	-0.00779567	0.002081	0.000195464	1	--
cg07651452	2	240323957	HDAC4	TSS1500	682	-0.00961739	0.00256807	0.000196412	1	--
cg19384106	6	33289202	DAXX;DAXX;DAXX;DAXX	Body;Body;Body;Body	676	-0.0142595	0.00380859	0.000197298	1	--
cg00297741	10	1198879			679	-0.0107961	0.00288961	0.000203335	1	--
cg25358410	9	95055763	IARS;IARS;SNORA84;IARS	5'UTR;5'UTR;TSS1500;1stExon	684	0.00550509	0.00147543	0.000207201	1	++
cg23791813	20	39317833	MAFB;MAFB	5'UTR;1stExon	687	0.00624891	0.00167926	0.000215289	1	++
cg05428912	6	42989345	C6orf153	TSS200	672	0.00301826	0.000811754	0.000218249	1	++
cg22459320	17	62658827	SMURF2	TSS1500	680	0.00675796	0.00181925	0.000221	1	++
cg10928931	7	144051247	ARHGEF5	TSS1500	687	0.0165021	0.00445035	0.00022656	1	++
cg20536983	8	13134166	DLC1	Body	681	0.00137839	0.000371743	0.000226842	1	++
cg26762050	16	67022599	CES8	TSS200	680	-0.0183119	0.00494128	0.00022864	1	--
cg01862172	6	147829799	SAMD5	TSS1500	683	-0.00150364	0.00040586	0.000229511	1	--
cg14365143	21	48088046			684	0.0048752	0.00131709	0.000232461	1	++
cg11427028	4	188391387			671	-0.019297	0.00521391	0.000233225	1	--
cg25629326	8	95274342	GEM;GEM;GEM	5'UTR;5'UTR;1stExon	683	0.00693088	0.00187292	0.000233301	1	++
cg03677069	10	88718317	SNCG;SNCG;MMRN2	1stExon;5'UTR;TSS1500	688	-0.0394445	0.0106807	0.000240029	1	--
cg07912453	15	99551585	LOC145814	TSS1500	688	-0.0123376	0.00334247	0.000241772	1	--
cg16068401	18	54317872	WDR7;WDR7	TSS1500;TSS1500	685	-0.00932591	0.00253099	0.000247969	1	--
cg20570458	3	124069933	KALRN;KALRN	Body;Body	681	0.0234854	0.00638231	0.000252827	1	++
cg08824335	9	38622360	C9orf122	Body	687	-0.00849897	0.00231213	0.000256503	1	--
cg17162808	20	33266296	PIGU	TSS1500	688	0.0274849	0.0074813	0.000258448	1	++
cg19939503	1	223919461	CAPN2;CAPN2	Body;Body	676	-0.0115394	0.00314076	0.000258556	1	--
cg14272860	19	42580418	ZNF574;ZNF574	5'UTR;1stExon	680	0.00210319	0.000573252	0.000263652	1	++
cg11418595	2	177052486	HOXD1	TSS1500	687	-0.0144459	0.00393839	0.000264334	1	--
cg13187967	11	13485012	BTBD10	TSS200	682	0.00294251	0.000802699	0.000266738	1	++
cg02827075	19	46094683	GPR4	Body	687	0.0340434	0.00929044	0.00026803	1	++
cg13471996	2	228497892	C2orf83;C2orf83;C2orf83;C2orf83	1stExon;1stExon;5'UTR;5'UTR	687	-0.0193709	0.00529014	0.000270756	1	--
cg21863334	20	36157405	BLCAP;BLCAP;BLCAP;BLCAP	TSS1500;TSS1500;TSS1500;TSS1500	687	-0.020223	0.00552709	0.000273684	1	--
cg24593372	1	54562121	C1orf83	Body	687	0.0234984	0.00642257	0.000273863	1	++
cg25503149	17	6160770			686	-0.0497377	0.0136186	0.000280823	1	--
cg05043627	14	100769643	SLC25A29	Body	681	0.0156772	0.00429589	0.00028403	1	++
cg26837479	8	146228149	ZNF252;C8orf77	Body;TSS200	680	0.00132322	0.000362765	0.000285965	1	++
cg25360147	5	140566664	PCDHB9	TSS1500	681	-0.00647603	0.00177669	0.000288784	1	--
cg12566149	19	11525678	RGL3;RGL3	Body;Body	688	0.0150975	0.00414233	0.00028889	1	++
cg08225549	8	80550161	STMN2	Body	681	-0.0596387	0.0163788	0.000292983	1	--
cg25621096	1	151032116	CDC42SE1;CDC42SE1;CDC42SE1;MLLT11;CDC42SE1	5'UTR;1stExon;5'UTR;TSS200;1stExon	683	0.0091398	0.00251233	0.00029654	1	++
cg24382918	3	141634157	ATP1B3	Body	682	-0.00978312	0.00269617	0.000307421	1	--

## Sheet: S20
Table S20. Handedness, EWAS, ALSPAC 7 years, RH vs LH (basic model )
	CHR	Position	Gene	Gene region	Weight	Estimate	SE	p-value	q-value	Direction
cg19587237	1	54797076	SSBP3;SSBP3;SSBP3	Body;Body;Body	756	0.0254038	0.00477066	1.34694e-07	0.0635037	++
cg13048285	2	117509771			757	0.0381003	0.00738229	3.17084e-07	0.149494	++
cg11239826	5	180685955	TRIM52	Body	753	-0.0320602	0.00624609	3.67061e-07	0.173056	--
cg13289118	15	75255681			751	-0.0102293	0.00210782	1.49075e-06	0.702838	--
cg24902920	6	10416373	TFAP2A;TFAP2A	Body;TSS1500	745	0.00969165	0.00203982	2.44364e-06	1	++
cg11098525	4	1320231	MAEA;MAEA	Body;Body	707	-0.00795688	0.00168611	2.8789e-06	1	--
cg06678594	2	43573198	THADA;THADA	Body;Body	748	0.0134747	0.00289365	3.82818e-06	1	++
cg16590190	1	13909522	PDPN;PDPN	TSS1500;TSS1500	755	0.0386029	0.0083566	4.55157e-06	1	++
cg17097923	17	6679541	FBXO39	TSS200	749	0.00709686	0.00154091	4.86202e-06	1	++
cg17482706	9	77643371	C9orf41	TSS200	755	0.00417154	0.000910111	5.3813e-06	1	++
cg11858880	18	77319357			756	-0.0113541	0.00249294	6.15561e-06	1	--
cg25685519	14	52536721	NID2	TSS1500	751	0.0120468	0.00264594	6.20722e-06	1	++
cg03150378	16	29196699			736	-0.00521657	0.00115998	8.04883e-06	1	--
cg09641576	7	5338965	SLC29A4;SLC29A4	Body;Body	756	-0.0173902	0.00387565	8.39276e-06	1	--
cg26771272	17	18163183	FLII;SMCR7;SMCR7;SMCR7	TSS1500;TSS1500;TSS1500;TSS1500	733	-0.0102617	0.00229006	8.67074e-06	1	--
cg05529156	10	90107539	RNLS;RNLS	Body;Body	756	-0.00592106	0.00132707	9.41785e-06	1	--
cg16331281	10	4445958			757	0.0245063	0.00552619	1.06495e-05	1	++
cg23414876	16	67197396	HSF4;HSF4;HSF4;HSF4;FBXL8	5'UTR;1stExon;1stExon;5'UTR;Body	754	0.00423197	0.00096288	1.27262e-05	1	++
cg18639734	17	2860745	RAP1GAP2;RAP1GAP2	Body;Body	747	0.00665548	0.00151475	1.28206e-05	1	++
cg25190094	1	9321735	H6PD	Body	756	-0.019613	0.00449683	1.47835e-05	1	--
cg08571362	7	100224015	TFR2	Body	757	0.0231134	0.00530152	1.4896e-05	1	++
cg09519273	2	218550825	DIRC3	Body	752	-0.0102042	0.002353	1.65211e-05	1	--
cg26980937	14	56991775			744	-0.019249	0.00444769	1.72024e-05	1	--
cg10185767	6	169196473			699	-0.0214956	0.0049852	1.86205e-05	1	--
cg21961890	7	12510665			737	-0.0124519	0.00289789	1.97461e-05	1	--
cg22960133	10	3457118			746	-0.00696816	0.00162247	1.98958e-05	1	--
cg25580782	10	6003621	IL15RA;IL15RA	Body;Body	743	-0.00842703	0.00196233	1.994e-05	1	--
cg11973877	1	52195423	OSBPL9;OSBPL9;OSBPL9;OSBPL9;OSBPL9;OSBPL9;OSBPL9	TSS200;Body;5'UTR;Body;Body;TSS200;TSS200	752	0.00415593	0.000969731	2.06876e-05	1	++
cg21763226	7	15240141	TMEM195	3'UTR	751	0.0262809	0.00614503	2.15123e-05	1	++
cg07076845	14	103553804			757	-0.0166928	0.00391118	2.23342e-05	1	--
cg03296910	6	76309300			754	-0.00770097	0.00181027	2.37448e-05	1	--
cg26088333	12	9557316			747	-0.012673	0.00298423	2.4552e-05	1	--
cg27357675	7	149733103			712	-0.0168109	0.00396133	2.50173e-05	1	--
cg08699355	12	80328999	PPP1R12A;PPP1R12A	TSS200;5'UTR	754	0.0101203	0.00239933	2.77754e-05	1	++
cg07201017	10	102996571	FLJ41350	Body	757	-0.00972655	0.00232182	3.14314e-05	1	--
cg13381243	7	1103063	C7orf50;C7orf50;C7orf50	Body;Body;Body	754	-0.0255084	0.00611112	3.35531e-05	1	--
cg05502283	19	13203715	NFIX	3'UTR	755	-0.0222751	0.00533978	3.3915e-05	1	--
cg18492115	19	7528785	ARHGEF18;ARHGEF18	Body;Body	746	-0.00306991	0.00073607	3.40898e-05	1	--
cg09261403	7	923516	C7orf20	Body	754	0.0226829	0.00544457	3.47148e-05	1	++
cg03052541	17	78925543	RPTOR;RPTOR	Body;Body	755	0.0213731	0.00513093	3.47992e-05	1	++
cg26009192	2	120282200	SCTR	TSS200	757	-0.0272442	0.0065491	3.56236e-05	1	--
cg01167323	1	90284686			757	-0.020473	0.0049291	3.66254e-05	1	--
cg01924776	7	102087663	ORAI2;ORAI2	3'UTR;3'UTR	752	-0.0139496	0.00336631	3.81907e-05	1	--
cg11081694	1	91871709	HFM1	TSS1500	747	-0.00842975	0.00203431	3.82328e-05	1	--
cg13094252	8	104153753	C8orf56;BAALC;BAALC	TSS200;Body;Body	757	0.013801	0.00333429	3.89436e-05	1	++
cg07957806	17	17046995	MPRIP;MPRIP	Body;Body	742	-0.00457627	0.00110598	3.92581e-05	1	--
cg16545079	17	8055888	PER1	TSS200	755	0.00774269	0.0018735	4.00271e-05	1	++
cg16239257	14	75052674	LTBP2	Body	745	-0.0151511	0.00368224	4.32831e-05	1	--
cg18951587	2	64067908	UGP2;UGP2	TSS1500;TSS200	757	0.00386421	0.000941399	4.50545e-05	1	++
cg24533007	12	132146956			757	0.0264304	0.0064686	4.87736e-05	1	++
cg13804738	10	133000233	TCERG1L	Body	749	0.0206097	0.00505263	5.02795e-05	1	++
cg05268122	16	2288808			751	-0.0127715	0.00313257	5.06846e-05	1	--
cg27285720	1	89664782	GBP4	TSS200	756	-0.0150799	0.00369908	5.07262e-05	1	--
cg01602690	2	176987161	HOXD9	TSS1500	738	0.0118691	0.00291306	5.13313e-05	1	++
cg26593946	15	96869043	NR2F2	TSS200	752	-0.0112632	0.00276616	5.18052e-05	1	--
cg20662169	11	123504302	SCN3B;SCN3B	3'UTR;3'UTR	757	0.0373397	0.00917476	5.21957e-05	1	++
cg14071186	14	71635288			755	0.0329066	0.0080893	5.26315e-05	1	++
cg22047295	2	175462522	WIPF1;WIPF1	5'UTR;5'UTR	756	-0.00959209	0.00235925	5.31042e-05	1	--
cg05716278	10	6221273	PFKFB3	Body	753	-0.0111602	0.00275496	5.65241e-05	1	--
cg27306119	2	9144605	MBOAT2	TSS1500	755	0.00176025	0.000434673	5.68256e-05	1	++
cg23784160	7	2260593	MAD1L1;MAD1L1;MAD1L1	Body;Body;Body	728	-0.00793009	0.00195835	5.70997e-05	1	--
cg00399807	16	11368889	PRM3	TSS1500	755	-0.011679	0.0028866	5.77035e-05	1	--
cg08555612	3	71834640	PROK2;PROK2	TSS1500;TSS1500	746	0.00253287	0.000627369	5.98949e-05	1	++
cg03820837	3	28431690	ZCWPW2	TSS1500	743	0.0107551	0.00266583	6.06393e-05	1	++
cg23184756	7	63646960			753	-0.010969	0.00271932	6.07326e-05	1	--
cg23235622	20	34039349			754	-0.0119281	0.00295807	6.10572e-05	1	--
cg01592369	12	133564113	ZNF26	Body	744	-0.0722502	0.0179268	6.1684e-05	1	--
cg06687732	19	5892460			757	0.0323583	0.00803379	6.22186e-05	1	++
cg08732919	5	180581301	OR2V2	TSS1500	752	-0.0138415	0.00343871	6.29334e-05	1	--
cg17434154	1	217306590	ESRRG	5'UTR	757	0.046386	0.0115292	6.3372e-05	1	++
cg14829516	17	38249430	THRA;NR1D1	Body;Body	743	-0.0182038	0.00452783	6.42732e-05	1	--
cg01843999	5	137438732			746	-0.00829901	0.00206844	6.64702e-05	1	--
cg09192377	10	94834219	CYP26A1;CYP26A1	Body;Body	753	0.00521358	0.00130006	6.69464e-05	1	++
cg08732879	17	41180520	RND2	Body	757	0.0213521	0.00533359	6.88601e-05	1	++
cg26219458	14	95916220	C14orf49	Body	748	-0.02057	0.00515063	7.17444e-05	1	--
cg19419801	4	25235712	PI4K2B;PI4K2B	1stExon;5'UTR	757	0.00317455	0.00079531	7.2281e-05	1	++
cg01995067	16	863240	PRR25	Body	756	-0.0220725	0.00553431	7.32806e-05	1	--
cg12606891	1	7913872	UTS2;UTS2	TSS1500;TSS1500	750	-0.0126415	0.00316976	7.33813e-05	1	--
cg18358662	13	111305805	CARS2	Body	752	-0.0199392	0.00500244	7.40493e-05	1	--
cg25844605	20	5485475	LOC149837	TSS1500	757	-0.0377973	0.00949118	7.50842e-05	1	--
cg15513657	14	101244606			750	0.0104579	0.00262645	7.53376e-05	1	++
cg00561081	16	71493275	ZNF23	5'UTR	755	-0.0153147	0.00385067	7.67279e-05	1	--
cg07148651	8	1155617			750	-0.00623525	0.00156805	7.70136e-05	1	--
cg05944174	7	157368901	PTPRN2;PTPRN2;PTPRN2	Body;Body;Body	753	0.0268274	0.00674996	7.76104e-05	1	++
cg04969937	1	9883887	CLSTN1;CLSTN1;CLSTN1;CLSTN1	1stExon;1stExon;5'UTR;5'UTR	757	0.00450037	0.00113368	7.91018e-05	1	++
cg12060132	1	47395331	CYP4A11	3'UTR	756	-0.0384977	0.00972785	8.3176e-05	1	--
cg13608171	5	169931831	KCNIP1;KCNIP1;KCNIP1	Body;Body;Body	749	-0.0134964	0.00341393	8.46721e-05	1	--
cg14843337	3	12194691	SYN2;TIMP4;SYN2	Body;3'UTR;Body	757	-0.0105596	0.00267149	8.4803e-05	1	--
cg06837568	12	108634212	WSCD2	Body	757	0.0560844	0.0141895	8.48711e-05	1	++
cg02259550	16	58005416	CNGB1;CNGB1	TSS1500;TSS1500	757	0.0129984	0.00329298	8.66958e-05	1	++
cg27193021	11	14284425	SPON1	Body	749	-0.00417063	0.00105824	8.90167e-05	1	--
cg00546180	10	103815814	C10orf76	5'UTR	754	0.00327843	0.000832261	8.9657e-05	1	++
cg15913645	5	71603588	MRPS27	Body	749	0.0097844	0.0024849	9.03155e-05	1	++
cg16883805	17	52946			738	-0.0100326	0.00255262	9.31446e-05	1	--
cg03350366	11	71752919	NUMA1	5'UTR	747	0.0102675	0.00261365	9.37658e-05	1	++
cg20855001	13	114761326	RASA3	Body	757	-0.0236337	0.00604016	9.97997e-05	1	--
cg00090197	1	43738732	TMEM125	Body	750	-0.0108087	0.00276335	0.000100413	1	--
cg24650114	10	38692317	CDC10L	TSS1500	705	0.00682709	0.00174732	0.000102775	1	++
cg16679297	5	168534069	SLIT3	Body	755	-0.010587	0.00271328	0.000104296	1	--
cg11467680	2	817308			748	-0.0216619	0.00555157	0.000104378	1	--

## Sheet: S21
Table S21. Handedness, EWAS, ALSPAC 7 years, RH vs LH (adjusted model )
	CHR	Position	Gene	Gene region	Weight	Estimate	SE	p-value	q-value	Direction
cg11239826	5	180685955	TRIM52	Body	738	-0.0348171	0.00635266	5.90007e-08	0.0278167	--
cg13048285	2	117509771			742	0.0395564	0.00738129	1.13219e-07	0.053379	++
cg13289118	15	75255681			736	-0.0109567	0.00212433	3.25289e-07	0.153362	--
cg19587237	1	54797076	SSBP3;SSBP3;SSBP3	Body;Body;Body	741	0.0240935	0.00478211	5.96787e-07	0.281364	++
cg18492115	19	7528785	ARHGEF18;ARHGEF18	Body;Body	731	-0.00355707	0.000746361	2.28807e-06	1	--
cg11858880	18	77319357			741	-0.011855	0.00251256	2.8658e-06	1	--
cg21961890	7	12510665			722	-0.0136322	0.00291847	3.60317e-06	1	--
cg06678594	2	43573198	THADA;THADA	Body;Body	733	0.0137413	0.00294612	3.7108e-06	1	++
cg27306119	2	9144605	MBOAT2	TSS1500	740	0.00199427	0.000436471	5.77869e-06	1	++
cg25685519	14	52536721	NID2	TSS1500	737	0.012034	0.0026397	6.06268e-06	1	++
cg10185767	6	169196473			684	-0.0230427	0.00507625	6.72142e-06	1	--
cg18639734	17	2860745	RAP1GAP2;RAP1GAP2	Body;Body	732	0.00677296	0.00152151	9.92157e-06	1	++
cg03296910	6	76309300			739	-0.00802097	0.00181969	1.20598e-05	1	--
cg24902920	6	10416373	TFAP2A;TFAP2A	Body;TSS1500	730	0.00893041	0.00204604	1.46536e-05	1	++
cg07201017	10	102996571	FLJ41350	Body	742	-0.0102177	0.00235379	1.62484e-05	1	--
cg16545079	17	8055888	PER1	TSS200	740	0.00814323	0.00188391	1.76358e-05	1	++
cg22700686	1	153538764	S100A2	TSS1500	741	-0.018911	0.00438879	1.8721e-05	1	--
cg09261403	7	923516	C7orf20	Body	739	0.0239363	0.00556161	1.9153e-05	1	++
cg22047295	2	175462522	WIPF1;WIPF1	5'UTR;5'UTR	741	-0.0101865	0.00237602	2.05977e-05	1	--
cg11081694	1	91871709	HFM1	TSS1500	732	-0.00865225	0.00203081	2.31874e-05	1	--
cg08699355	12	80328999	PPP1R12A;PPP1R12A	TSS200;5'UTR	739	0.010287	0.00241613	2.34516e-05	1	++
cg25844605	20	5485475	LOC149837	TSS1500	742	-0.0409018	0.0096279	2.44147e-05	1	--
cg05502283	19	13203715	NFIX	3'UTR	740	-0.0227586	0.0053668	2.52463e-05	1	--
cg26593946	15	96869043	NR2F2	TSS200	737	-0.0118789	0.00280839	2.64738e-05	1	--
cg02953457	6	30638580	DHX16;DHX16	Body;Body	742	-0.0220073	0.00521035	2.7152e-05	1	--
cg23414876	16	67197396	HSF4;HSF4;HSF4;HSF4;FBXL8	5'UTR;1stExon;1stExon;5'UTR;Body	739	0.00408593	0.000974583	3.10927e-05	1	++
cg00399807	16	11368889	PRM3	TSS1500	740	-0.0122781	0.00293162	3.16731e-05	1	--
cg13381243	7	1103063	C7orf50;C7orf50;C7orf50	Body;Body;Body	739	-0.0259588	0.00622384	3.41184e-05	1	--
cg24923219	11	94964236	SESN3;SESN3	1stExon;5'UTR	735	0.00250558	0.000600922	3.43303e-05	1	++
cg03150378	16	29196699			721	-0.00487967	0.00117187	3.52407e-05	1	--
cg17097923	17	6679541	FBXO39	TSS200	734	0.00638816	0.00153461	3.53563e-05	1	++
cg21411674	3	10332589	GHRL;GHRL;GHRL;GHRL;GHRL;GHRL;GHRL;GHRLOS;GHRL;GHRLOS;GHRLOS;GHRL;GHRL;GHRL;GHRL;GHRLOS	TSS200;Body;Body;TSS200;Body;Body;Body;Body;Body;Body;Body;Body;Body;Body;Body;Body	739	-0.0116619	0.00280416	3.59269e-05	1	--
cg07834682	2	45232641	SIX2	3'UTR	737	-0.0138172	0.00332593	3.66201e-05	1	--
cg11098525	4	1320231	MAEA;MAEA	Body;Body	693	-0.00699246	0.00168385	3.71707e-05	1	--
cg16331281	10	4445958			742	0.023188	0.00560437	3.93226e-05	1	++
cg17482706	9	77643371	C9orf41	TSS200	740	0.00380944	0.000923118	4.11769e-05	1	++
cg16590190	1	13909522	PDPN;PDPN	TSS1500;TSS1500	740	0.0348394	0.00845181	4.19872e-05	1	++
cg02866639	17	1808743			742	-0.0411538	0.00999307	4.26716e-05	1	--
cg23235622	20	34039349			739	-0.0119656	0.00290618	4.28625e-05	1	--
cg12163448	2	170430473	FASTKD1	TSS200	741	-0.00726009	0.00176351	4.29292e-05	1	--
cg06911113	1	20512617	UBXN10;UBXN10	5'UTR;1stExon	740	0.00539548	0.00131829	4.75302e-05	1	++
cg02095605	5	60141082	ELOVL7;ELOVL7	TSS1500;TSS1500	736	0.00694683	0.00170238	5.00468e-05	1	++
cg07957806	17	17046995	MPRIP;MPRIP	Body;Body	727	-0.00459388	0.00113005	5.34746e-05	1	--
cg16411251	14	59932250	GPR135	TSS200	733	0.0048136	0.0011867	5.54568e-05	1	++
cg06211794	20	48330587	B4GALT5	TSS200	738	0.00594308	0.00146794	5.72302e-05	1	++
cg16239257	14	75052674	LTBP2	Body	730	-0.0151099	0.00373346	5.76353e-05	1	--
cg19343464	11	105481509	GRIA4;GRIA4;GRIA4;GRIA4;GRIA4	5'UTR;5'UTR;5'UTR;1stExon;5'UTR	729	-0.00609682	0.00150713	5.80891e-05	1	--
cg18358662	13	111305805	CARS2	Body	737	-0.0203896	0.00504268	5.84884e-05	1	--
cg21763226	7	15240141	TMEM195	3'UTR	736	0.0253273	0.00626541	5.87413e-05	1	++
cg02980604	17	34058433	RASL10B	TSS1500	740	-0.0171446	0.00424506	5.96182e-05	1	--
cg11236526	3	64430940			714	0.0111448	0.00276088	6.03538e-05	1	++
cg13237147	3	188745304			735	0.0114882	0.00285079	6.19049e-05	1	++
cg22960133	10	3457118			731	-0.00657796	0.00163397	6.29993e-05	1	--
cg07076845	14	103553804			742	-0.0157584	0.00391653	6.34743e-05	1	--
cg27357675	7	149733103			699	-0.0160446	0.00398845	6.40985e-05	1	--
cg15939920	17	35457385	ACACA;ACACA;ACACA;ACACA;ACACA	Body;Body;Body;Body;Body	742	-0.0198571	0.0049388	6.42509e-05	1	--
cg00561081	16	71493275	ZNF23	5'UTR	740	-0.0158155	0.00393435	6.4483e-05	1	--
cg25415932	3	9791051	OGG1;OGG1;OGG1;OGG1;OGG1;OGG1;OGG1;OGG1	TSS1500;TSS1500;TSS1500;TSS1500;TSS1500;TSS1500;TSS1500;TSS1500	738	0.0202077	0.00504576	6.86212e-05	1	++
cg25580782	10	6003621	IL15RA;IL15RA	Body;Body	728	-0.0079385	0.00198474	7.01901e-05	1	--
cg26771272	17	18163183	FLII;SMCR7;SMCR7;SMCR7	TSS1500;TSS1500;TSS1500;TSS1500	718	-0.00934256	0.00233752	7.11628e-05	1	--
cg26980937	14	56991775			729	-0.0176851	0.00442845	7.20166e-05	1	--
cg27285720	1	89664782	GBP4	TSS200	741	-0.0149888	0.00375397	7.21125e-05	1	--
cg00090197	1	43738732	TMEM125	Body	735	-0.0111754	0.00279929	7.23373e-05	1	--
cg08813349	13	100630430			737	-0.0069242	0.00173484	7.26078e-05	1	--
cg06263843	15	83240550	CPEB1;CPEB1;CPEB1;CPEB1;CPEB1;CPEB1;CPEB1	5'UTR;5'UTR;5'UTR;1stExon;Body;1stExon;1stExon	742	-0.0102235	0.00256344	7.34739e-05	1	--
cg03928961	3	196693980	PIGZ	5'UTR	740	-0.0306138	0.0076768	7.36064e-05	1	--
cg18023666	5	173148154			741	-0.0141204	0.00354303	7.43406e-05	1	--
cg09519273	2	218550825	DIRC3	Body	737	-0.00946961	0.00237833	7.55445e-05	1	--
cg26765300	8	42691869	THAP1;THAP1	3'UTR;3'UTR	724	-0.0177136	0.00445003	7.6017e-05	1	--
cg26088333	12	9557316			732	-0.0121236	0.00304772	7.67559e-05	1	--
cg14058848	9	130479114	TTC16;PTRH1	Body;TSS1500	739	0.0232833	0.00585847	7.78338e-05	1	++
cg01995067	16	863240	PRR25	Body	741	-0.0223631	0.00563927	8.06424e-05	1	--
cg09794600	7	158858998	VIPR2	Body	741	-0.00975042	0.00245904	8.07954e-05	1	--
cg11133658	8	27779092	SCARA5	Body	676	-0.0334606	0.00844077	8.19012e-05	1	--
cg18951587	2	64067908	UGP2;UGP2	TSS1500;TSS200	742	0.0038012	0.000959656	8.21641e-05	1	++
cg10927178	20	56883965	RAB22A;PPP4R1L	TSS1500;Body	740	-0.0199962	0.00504995	8.26326e-05	1	--
cg19234484	1	242159456	MAP1LC3C	3'UTR	740	-0.0204599	0.00516717	8.26618e-05	1	--
cg13137376	6	30712221	IER3	1stExon	737	0.004745	0.00119894	8.33529e-05	1	++
cg14843337	3	12194691	SYN2;TIMP4;SYN2	Body;3'UTR;Body	742	-0.0107446	0.002716	8.38567e-05	1	--
cg06002524	14	74225627	C14orf43;C14orf43	5'UTR;5'UTR	741	0.00415345	0.00105103	8.53413e-05	1	++
cg13804738	10	133000233	TCERG1L	Body	734	0.020059	0.00507607	8.54533e-05	1	++
cg09641576	7	5338965	SLC29A4;SLC29A4	Body;Body	741	-0.0153258	0.00388826	8.89717e-05	1	--
cg03820837	3	28431690	ZCWPW2	TSS1500	728	0.0105581	0.0026811	9.04407e-05	1	++
cg16591816	6	170190914	C6orf122;C6orf208	Body;Body	733	0.00602163	0.00153016	9.13764e-05	1	++
cg00018896	13	25671476	PABPC3	1stExon	740	0.0172772	0.00439105	9.15328e-05	1	++
cg08422456	4	88720194	IBSP	TSS1500	742	0.0173108	0.00440115	9.20271e-05	1	++
cg22537597	7	149530984	SSPO	3'UTR	737	0.0196261	0.00499254	9.29033e-05	1	++
cg12606891	1	7913872	UTS2;UTS2	TSS1500;TSS1500	735	-0.0127213	0.00323687	9.32932e-05	1	--
cg03970229	11	92702507	MTNR1B	TSS1500	742	-0.0225021	0.00572837	9.39419e-05	1	--
cg06837568	12	108634212	WSCD2	Body	742	0.0559978	0.0142749	9.60147e-05	1	++
cg25228280	19	22321700			731	0.0109898	0.00280712	9.92721e-05	1	++
cg03052541	17	78925543	RPTOR;RPTOR	Body;Body	740	0.0202605	0.00518048	0.000100789	1	++
cg07148651	8	1155617			735	-0.00625145	0.00160128	0.00010371	1	--
cg24533007	12	132146956			742	0.02553	0.00654354	0.000104662	1	++
cg18068059	3	172083178	FNDC3B;FNDC3B	Body;Body	742	0.017921	0.00459393	0.000104892	1	++
cg01019028	6	132722810	MOXD1	TSS200	731	-0.0051555	0.00132177	0.000105277	1	--
cg17107501	10	98982314	ARHGAP19	3'UTR	719	-0.0230571	0.00591256	0.000105775	1	--
cg14283328	11	66823587	RHOD	TSS1500	742	-0.0315235	0.00808521	0.00010579	1	--
cg24650114	10	38692317	CDC10L	TSS1500	691	0.00690569	0.00177223	0.000107515	1	++
cg12060132	1	47395331	CYP4A11	3'UTR	741	-0.0378998	0.00975958	0.00011266	1	--

## Sheet: S22
Table S22. Handedness, EWAS, ALSPAC 17 years, RH vs LH (basic model)
	CHR	Position	Gene	Gene region	Weight	Estimate	SE	p-value	q-value	Direction
cg12906880	6	34294802	NUDT3	Body	759	-0.0153445	0.00301404	4.53662e-07	0.213886	--
cg01942127	3	53529259	CACNA1D;CACNA1D;CACNA1D	1stExon;1stExon;1stExon	748	0.0131157	0.00262647	7.44321e-07	0.350921	++
cg27648808	5	168439973	SLIT3	Body	742	-0.0124351	0.00261104	2.31686e-06	1	--
cg00425827	5	131346715	ACSL6;ACSL6	Body;Body	755	-0.0174343	0.0036805	2.61003e-06	1	--
cg19992906	12	126055778	TMEM132B	Body	759	0.027969	0.00600447	3.79342e-06	1	++
cg14655855	9	13278626			753	0.0197252	0.00424707	4.05006e-06	1	++
cg15501231	6	31737630	C6orf27	Body	758	0.0133823	0.00292679	5.66565e-06	1	++
cg02242894	16	31494799	SLC5A2	Body	758	-0.0133098	0.0029274	6.38071e-06	1	--
cg20548564	13	28240073	POLR1D	Body	747	0.00682436	0.00150343	6.61974e-06	1	++
cg08815670	10	76995827	COMTD1	TSS200	750	0.00334579	0.000758212	1.17672e-05	1	++
cg19922189	5	139505246	C5orf53	TSS1500	754	0.0133754	0.00306444	1.45799e-05	1	++
cg24227397	22	49640134			757	-0.0163631	0.00377175	1.6385e-05	1	--
cg13226861	2	42001767			759	0.0320282	0.0074013	1.71932e-05	1	++
cg18179491	4	763508	PCGF3	3'UTR	727	-0.0135657	0.00314847	1.87833e-05	1	--
cg17039011	10	694058	DIP2C	Body	759	-0.0152464	0.00354054	1.88741e-05	1	--
cg07645004	6	30520221	GNL1	Body	759	-0.0163569	0.0037997	1.89946e-05	1	--
cg16722964	19	57078783	ZNF470	TSS200	754	0.00708539	0.00165078	2.01e-05	1	++
cg00951302	6	166131985			759	-0.0307225	0.0071774	2.114e-05	1	--
cg07710833	5	112022460			759	-0.0243653	0.00569967	2.16638e-05	1	--
cg10729167	10	111220101			759	0.0253891	0.00595363	2.26709e-05	1	++
cg03208501	2	111435828	BUB1	TSS200	758	0.00462222	0.00108592	2.34768e-05	1	++
cg12812394	12	123473974	PITPNM2	Body	758	-0.0185028	0.0043472	2.35021e-05	1	--
cg04088212	11	2019859	H19	TSS1500	754	-0.0223999	0.00526831	2.39766e-05	1	--
cg08181060	6	143663339			753	0.0107833	0.00253947	2.45665e-05	1	++
cg26154937	10	49674883	ARHGAP22	Body	759	0.0352938	0.00836759	2.77574e-05	1	++
cg04993795	4	57770421			756	-0.00678131	0.00161097	2.88073e-05	1	--
cg08179155	4	132646574			759	-0.0380996	0.00907335	3.01126e-05	1	--
cg26402555	14	105750534	BRF1	Body	742	0.0102979	0.00246815	3.38743e-05	1	++
cg06620541	2	155101803	GALNT13	Body	759	-0.0249059	0.00597171	3.40244e-05	1	--
cg14179950	9	81889973			759	0.0238084	0.00570863	3.40319e-05	1	++
cg07007152	7	155601965	SHH	Body	757	0.00853301	0.00205399	3.64928e-05	1	++
cg16359521	1	19535871	UBR4	Body	752	0.00310625	0.000748804	3.74805e-05	1	++
cg03269363	22	50007725			754	-0.0159916	0.00386838	3.98307e-05	1	--
cg12596171	3	113251061	SIDT1	TSS200	754	0.0035479	0.000858315	3.98912e-05	1	++
cg25561792	17	62050205	SCN4A;SCN4A	5'UTR;1stExon	758	-0.0264167	0.00639137	3.99348e-05	1	--
cg27539720	17	60023175	MED13	3'UTR	759	0.0283165	0.00689842	4.50358e-05	1	++
cg25074751	2	173601133	RAPGEF4;LOC91149	Body;TSS200	748	0.00657919	0.00160283	4.51189e-05	1	++
cg18962288	2	65541060	SPRED2;SPRED2	Body;Body	749	-0.0179731	0.00438086	4.55126e-05	1	--
cg08225549	8	80550161	STMN2	Body	748	-0.0560875	0.0136856	4.63648e-05	1	--
cg11620409	11	61519687	C11orf9	TSS1500	759	-0.0257106	0.00629142	4.86261e-05	1	--
cg05218689	11	94680856			747	-0.00878046	0.00215069	4.95328e-05	1	--
cg09894136	22	43833175	MPPED1	Body	759	-0.0228147	0.00559292	5.01649e-05	1	--
cg09888183	7	63020706			759	0.0404987	0.00994473	5.16258e-05	1	++
cg24237813	20	50385486	ATP9A	TSS1500	756	0.00879306	0.00216312	5.32724e-05	1	++
cg27539234	17	7218945	GPS2	TSS1500	759	0.0112957	0.00278359	5.4842e-05	1	++
cg03492469	16	126855	MPG;MPG;MPG	TSS200;TSS1500;TSS1500	759	0.0116316	0.0028673	5.5151e-05	1	++
cg09816180	4	72650088	GC	TSS1500	754	-0.0130683	0.00323146	5.81571e-05	1	--
cg00810292	13	75900518	TBC1D4	Body	759	0.0349829	0.00866053	5.92749e-05	1	++
cg03717442	2	45172201	SIX3	3'UTR	759	0.0240432	0.00595306	5.94127e-05	1	++
cg24089600	13	110960177	COL4A1;COL4A2	TSS1500;5'UTR	751	0.0143403	0.00355489	6.06848e-05	1	++
cg25868286	17	42092488	TMEM101	TSS200	750	0.00745872	0.00185	6.12629e-05	1	++
cg10775195	14	77292399	C14orf166B	TSS1500	756	-0.0205897	0.00511539	6.29368e-05	1	--
cg04688476	22	37215656	PVALB	TSS200	759	-0.022061	0.00548226	6.3168e-05	1	--
cg23112213	5	137549144	CDC23	TSS200	751	-0.00636097	0.00158141	6.36939e-05	1	--
cg20165301	17	46181346			757	0.0198612	0.00494214	6.45976e-05	1	++
cg03082830	7	1165370	C7orf50;C7orf50;C7orf50	Body;Body;Body	757	-0.0211437	0.00526551	6.54685e-05	1	--
cg16910379	17	30186525	C17orf79	TSS200	756	-0.00187733	0.000467703	6.59087e-05	1	--
cg23073439	6	18155296	KDM1B;TPMT;TPMT	TSS1500;1stExon;5'UTR	751	-0.00813944	0.00202773	6.59194e-05	1	--
cg11090826	3	69101654	TMF1	TSS200	757	0.00119634	0.000298522	6.76717e-05	1	++
cg19516105	1	26551710			757	0.0257062	0.00641501	6.77661e-05	1	++
cg13922757	9	140613912	EHMT1;EHMT1	Body;Body	746	-0.0100979	0.00251977	6.77917e-05	1	--
cg14833439	1	114324759	RSBN1	Body	754	-0.0131136	0.00327452	6.84885e-05	1	--
cg00001510	19	54746945	LILRA6	TSS1500	759	-0.0168172	0.00419972	6.85455e-05	1	--
cg06376992	15	79296424	RASGRF1;RASGRF1;RASGRF1	Body;Body;5'UTR	732	0.015443	0.00385636	6.87461e-05	1	++
cg16636271	6	139694487	CITED2;CITED2;CITED2	Body;Body;Body	758	0.00841347	0.00210837	7.25971e-05	1	++
cg07625619	16	69050940	TMCO7	Body	752	-0.00865257	0.00216979	7.34863e-05	1	--
cg21913888	19	50084626	PRRG2;NOSIP;PRRG2	1stExon;TSS1500;5'UTR	759	0.0274683	0.00689706	7.49873e-05	1	++
cg26230390	2	203130314	NOP58	TSS200	754	0.00463727	0.00116526	7.59747e-05	1	++
cg25588680	2	201635383	AOX2P	TSS200	755	-0.00853201	0.00214396	7.59768e-05	1	--
cg12591770	15	100913571			754	0.00899462	0.00226644	7.94836e-05	1	++
cg15039414	2	43454687	ZFP36L2;LOC100129726	TSS1500;Body	751	-0.00251115	0.000632891	7.98002e-05	1	--
cg10938046	6	43969577	C6orf223	Body	754	-0.0169531	0.00427474	8.03789e-05	1	--
cg12594581	3	196750426	MFI2;MFI2	Body;Body	759	-0.0271644	0.00685217	8.08339e-05	1	--
cg22965016	13	111917916	ARHGEF7;ARHGEF7;ARHGEF7;ARHGEF7;ARHGEF7	Body;Body;Body;Body;Body	752	0.0112164	0.00282998	8.12216e-05	1	++
cg04392578	14	33668261	NPAS3;NPAS3;NPAS3;NPAS3	Body;Body;Body;Body	759	-0.0128672	0.00325004	8.25932e-05	1	--
cg17579753	17	34079998	GAS2L2	TSS200	759	-0.0202563	0.00511936	8.33764e-05	1	--
cg19188632	2	3702481			758	-0.0206772	0.00522708	8.37332e-05	1	--
cg12368694	11	70391098	SHANK2;SHANK2	Body;Body	759	0.028346	0.00716886	8.43219e-05	1	++
cg04919274	3	154146871	GPR149	1stExon	756	0.00836046	0.00211516	8.4839e-05	1	++
cg04301682	4	76598670	G3BP2;G3BP2;G3BP2	TSS200;TSS1500;TSS200	758	-0.00264501	0.000669496	8.54758e-05	1	--
cg23322531	2	8821658	ID2	TSS1500	758	-0.00147194	0.000372818	8.63923e-05	1	--
cg23648991	6	158586534	SERAC1	5'UTR	748	-0.0117423	0.00297586	8.73154e-05	1	--
cg20255699	19	458405	SHC2	Body	755	0.0260479	0.00660244	8.74732e-05	1	++
cg22877212	3	4355346	SETMAR;SETMAR	Body;Body	749	-0.00837177	0.00212398	8.8851e-05	1	--
cg06619766	2	223171105			756	0.00533415	0.00135769	9.34887e-05	1	++
cg00627621	8	126442449	TRIB1	TSS200	749	-0.00210231	0.000535217	9.39112e-05	1	--
cg09496391	8	701366			753	0.0152858	0.00389379	9.47411e-05	1	++
cg20411340	1	1175370			759	0.0306087	0.00781326	9.78566e-05	1	++
cg25695424	13	114783597	RASA3	Body	744	0.00685148	0.00174959	9.86347e-05	1	++
cg14786381	18	56802613			755	0.0138695	0.00354361	9.93408e-05	1	++
cg01351295	3	195700735	SDHAP1	Body	758	-0.0220123	0.00562528	9.9646e-05	1	--
cg14241836	7	48124921			756	0.0169686	0.00433633	9.96601e-05	1	++
cg18061259	12	106977641	RFX4	Body	745	-0.00298063	0.000761654	9.97012e-05	1	--
cg27666046	17	80279077	SECTM1	3'UTR	759	-0.0331026	0.00846657	0.000100975	1	--
cg10185767	6	169196473			731	-0.0325849	0.00833512	0.000101518	1	--
cg26339484	1	935863	HES4;HES4	TSS1500;TSS1500	754	0.00447916	0.00114609	0.000101695	1	++
cg03672621	16	21514406	LOC100271836	TSS1500	758	-0.0106075	0.0027204	0.000105405	1	--
cg24651966	4	123664110	BBS12	Body	758	-0.0104469	0.0026794	0.000105513	1	--
cg22396279	1	154580739	ADAR;ADAR;ADAR;ADAR	5'UTR;TSS200;TSS200;TSS200	756	0.00846659	0.00217171	0.000105703	1	++
cg20105583	4	143819041			757	-0.0145549	0.00373401	0.000105971	1	--

[truncated: 5 more sheets: S23, S24, S25, S26, S27]
